1  
2  
3  
4  
5  
6  
7  
8  
9  
10  
11  
12  
13  
14  
15  
16  
17  
18  
19  
20  
21  
22  
23  
24  
25  
26  
27  
28  
29  
30  
31  
32  
33  
34

**The *wtf* meiotic driver gene family has unexpectedly persisted for over 100 million years**

Authors: Mickael De Carvalho<sup>1,2\*</sup>, Guo-Song Jia<sup>3,4\*</sup>, Ananya Nidamangala Srinivasa<sup>1,5</sup>, R. Blake Billmyre<sup>1</sup>, Yan-Hui Xu<sup>4</sup>, Jeffrey J. Lange<sup>1</sup>, Ibrahim M. Sabbarini<sup>1</sup>, Li-Lin Du<sup>4,6#</sup>, Sarah E. Zanders<sup>1,5#</sup>

\* These authors contributed equally

Affiliations:

- 1 Stowers Institute for Medical Research, Kansas City, MO 64110, USA
- 2 Open University, Milton Keynes, MK7 6BJ, UK.
- 3 PTN Joint Graduate Program, School of Life Sciences, Tsinghua University, Beijing, China
- 4 National Institute of Biological Sciences, Beijing, China
- 5 Department of Molecular and Integrative Physiology, University of Kansas Medical Center, Kansas City, KS 66160, USA
- 6 Tsinghua Institute of Multidisciplinary Biomedical Research, Tsinghua University, Beijing, China

# Corresponding authors:

Li-Lin Du  
Address: 7 Science Park Road, Zhongguancun Life Science Park, Beijing 102206, China  
Email: [dulilin@nibs.ac.cn](mailto:dulilin@nibs.ac.cn)  
Phone: 86-10-80713938

Sarah E. Zanders  
1000 E 50th Street  
Stowers Institute for Medical Research  
Kansas City, MO 64110, USA  
Email: [sez@stowers.org](mailto:sez@stowers.org)  
Phone: (816) 926-4000

## 35 **Abstract**

36 Meiotic drivers are selfish elements that bias their own transmission into more than half of the  
37 viable progeny produced by a driver+/driver- heterozygote. Meiotic drivers are thought to exist  
38 for relatively short evolutionary timespans because a driver gene or gene family is often found in  
39 a single species or in a group of very closely related species. Additionally, drivers are generally  
40 considered doomed to extinction when they spread to fixation or when suppressors arise. In this  
41 study, we examine the evolutionary history of the *wtf* meiotic drivers first discovered in the  
42 fission yeast *Schizosaccharomyces pombe*. We identify homologous genes in three other  
43 fission yeast species *S. octosporus*, *S. osmophilus*, and *S. cryophilus*, which are estimated to  
44 have diverged over 100 million years ago from the *S. pombe* lineage. Synteny evidence  
45 supports that *wtf* genes were present in the common ancestor of these four species. Moreover,  
46 the ancestral genes were likely drivers as *wtf* genes in *S. octosporus* cause meiotic drive. Our  
47 findings indicate that active meiotic drive systems can be maintained for long evolutionary  
48 timespans.

49

## 50 **Introduction**

51 During meiosis, the two alleles at a given locus segregate from each other and are each  
52 transmitted into an equal number of the viable gametes produced by a heterozygous organism.  
53 This fundamental rule of genetics is known as Mendel's Law of Segregation (Abbott and  
54 Fairbanks, 2016). Most genetic loci follow this law, which facilitates natural selection by allowing  
55 alternate variants to compete on an even playing field (Crow, 1991). Meiotic drivers, however,  
56 are genetic loci that manipulate gametogenesis to gain an unfair transmission advantage into  
57 gametes. Rather than being transmitted to 50% of the gametes produced by a driver+/driver-  
58 heterozygote, meiotic drivers are transmitted to most or even all of the functional gametes  
59 (Sandler and Novitski, 1957; Zimmering et al., 1970).

60

61 Meiotic drivers are found in diverse eukaryotes including plants, fungi and animals (Bravo  
62 Núñez et al., 2018b; Burt and Trivers, 2006; Courret et al., 2019a; Lindholm et al., 2016).  
63 Despite their broad phylogenetic distribution, drivers in different systems are not thought to  
64 share common evolutionary origins. Instead, empirical observations combined with theoretical  
65 work have led to the expectation that drivers are evolutionarily short-lived (Burt and Trivers,  
66 2006). Specifically, drivers are believed to have been born repeatedly, but each driver can only  
67 persist for a short evolutionary period before extinction, and as a result, drive systems are  
68 lineage-specific (Hatcher, 2000; Price et al., 2019).

69

70 Understanding the birth of a driver is conceptually straightforward: if a sequence acquires the  
71 ability to drive, it can spread in the population (Crow, 1991). The paths to driver extinction are  
72 more complex but one route to extinction is through suppression (Bastide et al., 2011; Bravo  
73 Núñez et al., 2018a; Carvalho and Vaz, 1999; Courret et al., 2019b; Tao et al., 2007; Unckless  
74 et al., 2015). Drive is generally costly to fitness, so natural selection is thought to favor the  
75 evolution of drive suppressors unlinked to the drive locus (Cazemajor et al., 1997; Crow, 1991;  
76 Finseth et al., 2021; Kumon et al., 2021; Zanders and Unckless, 2019). Suppressed drivers  
77 have no transmission advantage and are expected to accumulate inactivating mutations (Burt  
78 and Trivers, 2006). In a second path to driver extinction, the driver evades suppression and  
79 spreads to fixation. If the driver is on a sex chromosome or the driving haplotype acquires  
80 strongly deleterious mutations, driver fixation can lead to driver extinction via host extinction  
81 (Dyer et al., 2007; Hamilton, 1967). If the fixed driver is autosomal, it experiences no  
82 transmission advantage and can accumulate inactivating mutations, in a fate similar to that of  
83 suppressed drivers.

84

85 The molecularly identified meiotic drivers largely support the idea that drivers have limited  
86 evolutionary lifespans and confined species distribution, with a driver gene or gene family often

87 only found in a single species (Finseth et al., 2021; Lindholm et al., 2016; Lyon, 2003; Price et  
88 al., 2019; Zanders and Johannesson, 2021). In *Drosophila*, for example, the sister species *D.*  
89 *melanogaster* and *D. simulans* shared a common ancestor only 5.4 million years ago (Tamura,  
90 2003), but they each contain distinct meiotic drive systems (Cazemajor et al., 1997; Helleu et  
91 al., 2016; Larracuenta and Presgraves, 2012; Lin et al., 2018; Tao et al., 2007).

92

93 There are a few known exceptions where a drive gene is found in more than one species. For  
94 example, sequences homologous to the *Dox* driver of *Drosophila simulans* are also found in *D.*  
95 *mauritiana* and *D. sechellia* (Muirhead and Presgraves, 2021; Vedanayagam et al., 2021).

96 Although there have been more recent introgressions involving *Dox* between *D. simulans* and  
97 *D. mauritiana*, sequences homologous to *Dox* appear to have existed 0.2 million years ago in  
98 the ancestor of the *D. simulans* clade (Meiklejohn et al., 2018; Muirhead and Presgraves, 2021;  
99 Vedanayagam et al., 2021). In rice (*Oryza*), many meiotic drive systems and potential meiotic  
100 drive loci have been mapped as sterility loci in crosses between domesticated varieties/species,  
101 or between domesticated and wild varieties/species (representing up to ~0.9 million years of  
102 divergence). Homologs of genes in these drive systems exist in more distantly related rice  
103 species, but whether they are meiotic drivers or precursors of drivers is unclear (Chen et al.,  
104 2008; Huang et al., 2015; Koide et al., 2018; Long et al., 2008; Sakata et al., 2021; Shen et al.,  
105 2017; Xie et al., 2019, 2017; Yang et al., 2012; Yu et al., 2016). Another crop drive system is the  
106 'knobs' found in maize (*Zea mays*) and its wild relative *Tripsacum dactyloides*. These two  
107 species diverged about 1 million years ago (Ross-Ibarra et al., 2009), but drive of knobs has  
108 only been conclusively demonstrated in maize (Dawe et al., 2018; Kanizay et al., 2013). In  
109 fungi, the *Spok* genes first identified as drivers in *Podospora anserina* are found in several  
110 distantly related fungal species. However, horizontal gene transfer is a more likely explanation  
111 for the phylogenetic distribution of *Spok* genes than shared descent from a common ancestor  
112 (Grognet et al., 2014; Vogan et al., 2021).

113

114 In this work, we explore the long-term evolutionary dynamics of drive systems using the recently  
115 discovered *wtf* drivers as a model system. *wtf* driver genes are found in all sequenced isolates  
116 of the fission yeast *Schizosaccharomyces pombe*. Each sequenced *S. pombe* isolate contains  
117 between 4-14 distinct predicted *wtf* driver genes (Eickbush et al., 2019; Hu et al., 2017). The *wtf*  
118 drivers are killer meiotic drivers as they act by destroying the meiotic products (spores) that do  
119 not inherit the *wtf* driver from a *wtf*<sup>+</sup>/*wtf*<sup>-</sup> heterozygote (Figure 1A). To cause selective spore  
120 death, each *wtf* driver employs a poison protein and an antidote protein produced from two  
121 overlapping transcripts. All developing spores are exposed to the poison, while only spores that  
122 inherit the *wtf* drivers express the antidote and are rescued from destruction (Bravo Núñez et  
123 al., 2020a, 2020b, 2018a; Hu et al., 2017; Nuckolls et al., 2017).

124

125 Here, we analyzed the phylogenetic distribution of *wtf* genes and found highly diverged but  
126 homologous *wtf* genes in *Schizosaccharomyces octosporus*, *Schizosaccharomyces osmophilus*  
127 and *Schizosaccharomyces cryophilus*, three species that have diverged more than 100 million  
128 years ago from the *S. pombe* lineage (Brysch-Herzberg et al., 2019; Rhind et al., 2011).  
129 Analyses of synteny support that the *wtf* gene family existed in the common ancestor of *S.*  
130 *pombe* and these three other fission yeast species. Like the *S. pombe wtf* genes, the newly  
131 described *wtf* genes exhibit evolutionary signatures of genetic conflict, namely rapid evolution.  
132 Moreover, we demonstrate that at least one *wtf* gene in each of the species can encode poison  
133 and antidote proteins on overlapping coding sequences. We investigated a subset of the *S.*  
134 *octosporus wtf* genes further and found that some cause meiotic drive when heterozygous. We  
135 conclude that *wtf* drivers have been active for over 100 million years. Finally, we present a  
136 model in which *wtf* drivers outrun extinction through perpetual gene birth and renewal via  
137 recombination mechanisms.

138

139 **Results**

140

141 **Genes with homology to *wtf* drivers are found in *S. octosporus*, *S. osmophilus* and *S.***  
142 ***cryophilus***

143 As a first step in understanding the long-term evolution of the *wtf* meiotic drivers, we analyzed  
144 the phylogenetic distribution of the *wtf* gene family. There are four described

145 *Schizosaccharomyces* species in addition to *S. pombe*: *S. octosporus*, *S. osmophilus*, *S.*  
146 *cryophilus* and *S. japonicus* (Figure 1B) (Brysch-Herzberg et al., 2019; Rhind et al., 2011).

147 These species are thought to have shared a common ancestor around 200 million years ago.

148 The amino acid divergence of 1:1 orthologs between *S. pombe* and *S. japonicus* is 55%, which  
149 is similar to that observed between humans and lancelets (a cephalochordate) (Rhind et al.,  
150 2011).

151

152 At the time this work was initiated, genome assemblies were available for all species except *S.*

153 *osmophilus*, which was only recently described (Brysch-Herzberg et al., 2019). We therefore

154 sequenced *S. osmophilus* using both Illumina paired-end reads and Oxford nanopore reads. We

155 used these data to assemble a draft of the *S. osmophilus* genome consisting of 11 contigs. We

156 then predicted the coding sequences of *S. osmophilus* genes using *S. octosporus* annotations

157 as a guide (Figure 1-supplement 1-1 2) (Tong et al. 2019; Hoff & Stanke, 2018). We found that

158 1:1 orthologs between *S. osmophilus* and *S. octosporus* share 88.9% amino acid identity on

159 average, while *S. osmophilus* and *S. cryophilus* orthologs share 85.2% amino acid identity on

160 average (Xu et al., 2019) (Table S1). Our results are consistent with the previously proposed

161 phylogeny of the fission yeasts that used limited sequencing data from *S. osmophilus* ((Brysch-

162 Herzberg et al., 2019); Figure 1B).

163

164 We next searched for *wtf* gene homologs in the genome assemblies of *S. octosporus*, *S.*  
165 *osmophilus*, *S. cryophilus* and *S. japonicus*. Even within *S. pombe*, the *wtf* genes are diverse  
166 and a standard BLAST (Basic Local Alignment Search Tool) search using one *wtf* gene as a  
167 query does not identify all members of the family (Altschul et al., 1990). Because of this, we  
168 searched for homologs using PSI-BLAST (Position-Specific Iterated BLAST). PSI-BLAST uses  
169 the results from an initial search to create a profile of the multi-alignment between the query  
170 protein and the best hits. This profile is then used to find other proteins and the iterative process  
171 continues until no more significant hits are found (Altschul et al., 1997). Using the protein  
172 encoded by *S. pombe wtf4* as an initial query, we were able to find potential *wtf* homologs in *S.*  
173 *octosporus*, *S. osmophilus* and *S. cryophilus* but not *S. japonicus* (Figure 1B). We repeated PSI-  
174 BLAST searches using as queries proteins encoded by candidate *wtf* genes from non-*pombe*  
175 species (*S. octosporus wtf25*, *S. cryophilus wtf1* and *S. osmophilus wtf14*). These searches all  
176 identified *S. pombe* Wtf proteins as hits. None of our PSI-BLAST searches found candidate *wtf*  
177 homologs in *S. japonicus* or outside of fission yeasts.

178

179 We then used the nucleotide sequences of candidate *wtf* genes as queries to perform additional  
180 BLASTn searches to find potential pseudogenes missed by our PSI-BLAST searches. For  
181 example, we used the nucleotide sequences of all the *S. octosporus wtf* genes identified by the  
182 PSI-BLAST search as queries to search for homologous pseudogenes within *S. octosporus*.  
183 Only hits more than 200 base pairs long were considered, although there were additional  
184 shorter hits that are likely homologous. We then used sequence alignments of candidate *wtf*  
185 genes within each species, and sometimes between species, to refine the predicted coding  
186 sequences. In *S. octosporus*, we also generated long-read RNA sequencing data from a meiotic  
187 sample to facilitate the delineation of exon-intron boundaries of *wtf* genes.

188

189 Overall, we identified 48 predicted *wtf* genes and 35 predicted *wtf* pseudogenes in *S.*  
190 *octosporus*; 31 predicted *wtf* genes and 11 predicted *wtf* pseudogenes in *S. osmophilus*; and 2  
191 predicted *wtf* genes and 3 predicted *wtf* pseudogenes in *S. cryophilus* (Figure 1B; Figure 1-  
192 figure supplement 1; Table S2-S4). Previously, 16 intact *wtf* genes and 9 pseudogenes were  
193 described in the reference isolate of *S. pombe* (Bowen et al., 2003; Eickbush et al., 2019; Hu et  
194 al., 2017). We were concerned that the lack of PSI-BLAST hits in *S. japonicus* could have been  
195 due to extensive divergence rather than a lack of potential *wtf* gene homologs. However, a more  
196 extensive search not dependent on high sequence homology also failed to find potential *wtf*  
197 homologs in *S. japonicus* (see Methods).

198

### 199 **Candidate *wtf* genes of *S. octosporus*, *S. osmophilus* and *S. cryophilus* share additional** 200 **features with *S. pombe wtf* genes**

201 The homology between the *S. pombe wtf* genes and those found in the other  
202 *Schizosaccharomyces* species is low (Figure 2-figure supplement 1). For example, the most  
203 similar *wtf* gene pair between *S. pombe* (FY29033 *wtf25*) and *S. octosporus* (*S. octosporus*  
204 *wtf56*) shares only 16% amino acid identity, compared to an average of 65.3% amino acid  
205 identity between orthologous gene pairs (Table S1 and S5). Given this high divergence, we  
206 examined features other than protein sequences to further test if the candidate *wtf* genes are  
207 truly members of the *wtf* gene family.

208

209 We first looked for similarities in overall gene structure between the *S. pombe wtf* genes and the  
210 candidate *wtf* genes in *S. octosporus*, *S. osmophilus* and *S. cryophilus*. The *wtf* genes of *S.*  
211 *pombe* have been classified into three broad categories: predicted meiotic drivers (4-14 per  
212 isolate), predicted suppressors of drive that encode only antidote proteins (9-17 per isolate) and  
213 genes of unknown function (4 in each isolate) (Bravo Núñez et al., 2020b, 2018a; Eickbush et  
214 al., 2019; Hu et al., 2017; Nuckolls et al., 2017). We found that the overall gene structure of the



215 candidate *wtf* genes in all three species was similar to that of the 5-exon *wtf* drivers and 5-exon  
216 *wtf* suppressors in *S. pombe* (Figure 2A). Moreover, the relative sizes of the corresponding  
217 exons and introns are remarkably similar between the species, even though the actual  
218 sequences are generally quite different (Figure 2-figure supplement 1).

219

220 We next looked for similarities between promoters controlling the transcription of the *S. pombe*  
221 *wtf* genes and the potential promoters of the candidate *wtf* genes in other species. The  
222 promoters of the *S. pombe wtf4* gene are representative of the promoters of *wtf* drivers in *S.*  
223 *pombe* (Nuckolls et al., 2021). The Wtf4<sup>antidote</sup> protein is encoded on exons 1-6, with the  
224 promoter found upstream of exon 1. We found no shared homology between the *S. pombe*  
225 *wtf<sup>antidote</sup>* promoter sequences and sequences upstream of exon 1 in the candidate *wtf* genes  
226 found in the other species.

227

228 The Wtf4<sup>poison</sup> protein is encoded on exons 2-6 and the promoter is found within what is intron 1  
229 of the *wtf4<sup>antidote</sup>* transcript. The *S. pombe wtf4* poison promoter contains a cis-regulatory FLEX  
230 motif that is bound by the Mei4 master meiotic transcription factor and is essential for  
231 expression of the Wtf4<sup>poison</sup> protein (Nuckolls et al., 2021). The consensus sequence of the  
232 FLEX motif has been defined as GTAAACAAACA(A/T)A(A/C), with the first 11 nucleotides  
233 being more invariant (Abe and Shimoda, 2001). All verified *S. pombe wtf* drivers contain in their  
234 intron 1 the 11-bp GTAAACAAACA FLEX motif sequence (Nuckolls et al., 2021).

235

236 To examine whether Mei4 also regulates the expression of the candidate *wtf* genes outside of  
237 *S. pombe*, we first analyzed the conservation of the Mei4-binding motif. We compiled a list of 49  
238 *S. pombe* Mei4 target genes that have 1:1:1:1 orthologs in *S. octosporus*, *S. osmophilus* and *S.*  
239 *cryophilus* (Table S6) and used MEME (Multiple Em for Motif Elicitation) to perform *de novo*  
240 motif discovery in 1000-bp sequences upstream of the start codons of this set of genes in each

241 species (Bailey et al., 2015). Manual inspection of the MEME-discovered motifs revealed that  
242 the FLEX motif is highly conserved in these four species (Figure 2-figure supplement 2A).  
243 Combining the 196 genes from all four species as the input for MEME analysis resulted in a 11-  
244 bp motif matching the GTAAACAAACA FLEX motif sequence (Figure 2-figure supplement 2A).  
245 This MEME-identified 11-bp motif was submitted to the FIMO (Find Individual Motif  
246 Occurrences) tool of the MEME Suite to perform motif scanning in the genomes of the four  
247 species using the default  $P$  value cutoff of  $1E-4$ . The resulting 33089 FIMO hits were classified  
248 into unreliable hits ( $P$  value  $> 3E-6$ ) and confident hits ( $P$  value  $\leq 3E-6$ ) based on a comparison  
249 of the number of hits in the Mei4 target genes in *S. pombe* and the number of hits in other *S.*  
250 *pombe* genes. A total of 2917 confident hits (476, 716, 827 and 898 in *S. pombe*, *S. octosporus*,  
251 *S. osmophilus* and *S. cryophilus*, respectively) were found (Tables S7-S8).

252  
253 As expected, among the *wtf* genes in the *S. pombe* reference genome, only the four genes that  
254 can express the *wtf<sup>poison</sup>* transcript (*wtf4*, *wtf13*, *wtf19* and *wtf23*) possess confident FIMO hits in  
255 intron 1 (Figure 2-figure supplement 2B). Inspecting intron 1 of the candidate *wtf* genes in the  
256 other three species showed that, 20 of the 48 intact *wtf* candidate genes in *S. octosporus*  
257 possess confident FIMO hits in intron 1, one of the two intact *wtf* candidate genes in *S.*  
258 *cryophilus* possesses confident FIMO hits in intron 1, whereas none of the 31 intact *wtf*  
259 candidate genes in *S. osmophilus* possesses confident FIMO hits in intron 1 (Figure 2-figure  
260 supplement 2B, Tables S2-S4). Thus, the presence of the FLEX motif in intron 1 appears to be  
261 a feature conserved in a substantial fraction of candidate *wtf* genes in *S. octosporus*.

262  
263 To assess whether the presence of the FLEX motif in intron 1 of *wtf* candidate genes in *S.*  
264 *octosporus* is an indication of the ability to express the *wtf<sup>poison</sup>* transcript, we analyzed our long-  
265 read RNA sequencing data of meiotic *S. octosporus* cells. All 48 intact *S. octosporus wtf*  
266 candidate genes have long transcripts initiating from upstream of exon 1, and 31 of them also

267 have detectable short transcripts initiating from within intron 1 (Figure 2B, Figure 2-figure  
268 supplement 3, Table S2). Out of 20 intact *S. octosporus wtf* candidate genes with confident  
269 FIMO hits in intron 1, 17 have detectable short transcripts initiating from within intron 1. Thus,  
270 the presence of the FLEX motif in intron 1 correlates with the expression of short transcripts that  
271 likely correspond to the *wtf<sup>poison</sup>* transcripts ( $P = 0.016$ , Fisher's exact test). Furthermore, among  
272 the 31 genes with detectable short transcripts, those with higher levels of the short transcript are  
273 more likely to harbor the FLEX motif in intron 1, as 9 of the top 10 genes ranked by the  
274 expression level of the short transcript contain the FLEX motif, whereas only 2 of the bottom 10  
275 genes contain the FLEX motif ( $P = 0.0055$ , Fisher's exact test). Because 14 *S. octosporus wtf*  
276 candidate genes without confident FIMO hits in intron 1 nonetheless do have detectable short  
277 transcripts initiating from within intron 1, the lack of a conserved FLEX motif in intron 1 does not  
278 appear to preclude the expression of the *wtf<sup>poison</sup>* transcript in *S. octosporus*. It is thus possible  
279 that some of the candidate *wtf* genes in *S. osmophilus* may also be able to express the *wtf<sup>poison</sup>*  
280 transcript despite the absence of a conserved FLEX motif in intron 1.

281

282 Interestingly, most of the intact *wtf* candidate genes have an in-frame alternate translational  
283 start site near the beginning of exon 2, similar to the *wtf* drivers of *S. pombe* (Eickbush et al.,  
284 2019; Hu et al., 2017; Nuckolls et al., 2017). The only exceptions are *S. osmophilus wtf16* and  
285 *S. cryophilus wtf2*, which appear analogous to the *S. pombe* suppressor *wtf* genes in that they  
286 lack an alternate translational start site near the beginning of exon 2 (Figure 1-figure  
287 supplement 1) (Bravo Núñez et al., 2018a; Eickbush et al., 2019). No *wtf* candidate genes  
288 appeared similar to the unknown class of *S. pombe wtf* genes (Table S5) (Bravo Núñez et al.,  
289 2020a; Eickbush et al., 2019). We note that *wtf* candidate genes in *S. octosporus*, *S.*  
290 *osmophilus* and *S. cryophilus* share more homology among themselves than they do with *wtf*  
291 genes in *S. pombe* (Table S5).

292

293 We conclude based on the amino acid conservation, the conserved gene structure, a conserved  
294 promoter feature, and conserved presence of an alternate transcriptional start site in intron 1  
295 and an alternate translational start site near the beginning of exon 2, that candidate *wtf* genes  
296 we identified in *S. octosporus*, *S. cryophilus* and *S. osmophilus* are members of the *wtf* gene  
297 family. We, therefore, will henceforth refer to them as *wtf* genes.

298

299 ***wtf* genes in *S. octosporus*, *S. osmophilus* and *S. cryophilus* are associated with**  
300 **dispersed 5S rDNA sequences.**

301 The *S. pombe wtf* genes derive their names from their association with solo long terminal  
302 repeats (LTRs) of Tf transposons (with Tf) (Bowen et al., 2003; Wood et al., 2002). Most *S.*  
303 *pombe wtf* genes are flanked on at least one side by a solo LTR (Figure 3; Bowen et al., 2003).  
304 A Tf-related full-length transposon was previously discovered in *S. cryophilus* (designated  
305 Tcry1) and we found Tf-related full-length transposons in our *S. osmophilus* assembly (Rhind et  
306 al., 2011; Table S9). In *S. cryophilus*, none of the 10 solo LTRs are associated with *wtf* genes. In  
307 *S. osmophilus*, five out of 36 solo LTRs are associated with *wtf* genes (Figure 3). *S. octosporus*  
308 does not contain recognizable transposons (Rhind et al., 2011).

309

310 Instead of a close association with transposon sequences, we found that most the *wtf* genes  
311 outside of *S. pombe* are closely associated with dispersed 5S rDNA genes (Figure 3, Figure 3-  
312 figure supplement 1). In *S. octosporus*, *S. osmophilus* and *S. cryophilus* respectively, 87%  
313 (72/83), 79% (33/42) and 40% (2/5) of *wtf* genes are associated with 5S rDNA genes (Table  
314 S10). Conversely, 93% (106/114), 55% (59/107) and 3.4% (4/117) of the 5S rDNA genes in  
315 these three species respectively are associated with *wtf* genes (Table S10).

316

317 In *S. octosporus*, *S. osmophilus* and *S. cryophilus*, we found there is often a gene from an  
318 uncharacterized gene family situated between the *wtf* gene and an upstream 5S rDNA gene.

319 We named this new gene family *wag* for **w***tf*-**a**ssociated **g**ene (Figure 3; Table S2-S4, S11).  
320 Overall, we found that the genomic context of *wtf* genes could be described by a limited number  
321 of patterns, including those first identified in *S. pombe* that are largely specific to that species  
322 (Figure 3) (Bowen et al., 2003). These patterns likely reflect a few genomic contexts that were  
323 duplicated multiple times during the expansion of the gene family as not only the genes, but also  
324 the intergenic sequences within a given type of *wtf*-5S rDNA unit or 5S rDNA-*wag*-*wtf* unit are  
325 highly similar within a species (Figure 3-figure supplements 2-6).

326

327 ***wtf* genes were likely present in the common ancestor of *S. octosporus*, *S. osmophilus*,**  
328 ***S. cryophilus* and *S. pombe***

329 We next examined whether the *wtf* genes were present in the common ancestor of *S.*  
330 *octosporus*, *S. osmophilus*, *S. cryophilus* and *S. pombe*. The alternate hypothesis is that the *wtf*  
331 genes were transferred between the species by horizontal gene transfer or by introgression.  
332 Horizontal gene transfer does occur in fission yeast but the possibility of cross-species  
333 introgression is unclear (Dawe et al., 2018; Jeffares et al., 2017; Rhind et al., 2011; Seike et al.,  
334 2019, 2015; Sipiczki, 1979; Sipiczki et al., 1982).

335

336 At the genome level, synteny is limited between *S. pombe* and non-*pombe* fission yeast species  
337 (Rhind et al., 2011). However, if the *wtf* gene family was vertically inherited from a common  
338 ancestor, it is possible that we may find one or more *wtf* loci that exhibit synteny between *S.*  
339 *pombe* and at least one non-*pombe* species. We therefore inspected the genes flanking *S.*  
340 *pombe wtf* genes to look for situations where orthologous genes in another species also flanked  
341 a *wtf* gene (Table S12). We found that in *S. octosporus*, *S. osmophilus* and *S. pombe*, one or  
342 more *wtf* genes are present between the *clr4* and *met17* genes (Figure 4A). This shared  
343 synteny could reflect that the ancestor of these species contained a *wtf* gene between *clr4* and

344 *met17*, but it could also mean that the whole *clr4-met17* region has undergone horizontal gene  
345 transfer or introgression.

346

347 To distinguish these possibilities, we analyzed the divergence of the *clr4-met17* region between  
348 species. Superficially, the region appears quite divergent, with multiple genes gained and/or lost  
349 in different lineages. This observation supports a long period of divergence that would be  
350 expected if the region descended from the common ancestor of these species. We next  
351 analyzed the divergence more precisely. Given the extremely rapid evolution of the *wtf* genes  
352 (Eickbush et al., 2019), we thought that the flanking genes would prove most informative. If the  
353 region was recently transferred between lineages by horizontal gene transfer, it was possible  
354 there may be two copies of *clr4* and/or *met17* in the recipient genome. *met17* has an ancient  
355 paralog (*SPAC23A1.14c*) present in all fission yeast species, but we found no evidence of  
356 recent duplications of *met17* or *clr4*. We also reconstructed phylogenies of the fission yeast *clr4*  
357 and *met17* genes and found that the gene trees were consistent with the species trees (Figure  
358 4B-C). If the genes had been transferred between species, for example from the lineage leading  
359 to *S. pombe* to the lineage leading to *S. octosporus* and *S. osmophilus*, the gene tree should  
360 reflect that pattern. In this example, the *S. octosporus* and *S. osmophilus* *clr4* and *met17* genes  
361 should group with the *S. pombe* genes on trees, rather than with the *S. cryophilus* genes as we  
362 observed. In addition, the percent amino acid divergence we observed in pairwise comparisons  
363 between the orthologs revealed divergences similar to the average percent divergences  
364 between the species, except for *met17* of *S. octosporus*, which may have gained an intron and  
365 diverged extensively (Table S14). Together, our analyses are consistent with vertical  
366 transmission of *clr4* and *met17* and the *wtf* genes between them. This suggests the ancestor of  
367 *S. octosporus*, *S. osmophilus*, *S. cryophilus* and *S. pombe* had a *wtf* gene between *clr4* and  
368 *met17* and that the *wtf* gene was lost in the lineage leading to *S. cryophilus* (Figure 4A). We  
369 found additional shared synteny between *S. pombe* *wtf6* and *S. cryophilus* *wtf4*. Again,

370 phylogenetic evidence is consistent with a *wtf* gene being present at that locus in the ancestor  
371 of *S. octosporus*, *S. osmophilus*, *S. cryophilus* and *S. pombe* and being lost in the lineage  
372 leading to *S. octosporus* and *S. osmophilus* (Figure 4-figure supplement 1, Table S13-S14).

373

374 There were additional cases where an *S. pombe wtf* gene was flanked on one side by a gene  
375 whose ortholog was also flanked by a *wtf* in one of the other species (Table S12). We designate  
376 this partial synteny. We found three *S. pombe wtf* loci (*wtf27*, the *wtf30+wtf31+wtf10* locus, and  
377 *wtf33* all in the *S. kambucha* isolate) with partial synteny with *wtf* genes in *S. octosporus* (*wtf4*,  
378 *wtf31* and *wtf13*; Table S12) (Eickbush et al., 2019). Amongst those three loci, two were also in  
379 partial synteny with *wtf* genes in *S. osmophilus* (*wtf5* and *wtf15*). Altogether, our analyses  
380 indicate that *S. pombe*, *S. octosporus*, *S. osmophilus* and *S. cryophilus* inherited *wtf* genes from  
381 a common ancestor with multiple *wtf* genes.

382

### 383 ***wtf* genes show evolutionary signatures consistent with a history of genetic conflict**

384 We next wanted to determine if the *wtf* genes are ancient meiotic driver genes or if the genes  
385 more recently acquired the ability to drive in the lineage leading to *S. pombe*. To address this,  
386 we first analyzed the evolutionary history of the gene family in more depth. Meiotic drivers are  
387 predicted to be rapidly evolving and the *S. pombe wtf* genes support this prediction (Eickbush et  
388 al., 2019; Hu et al., 2017). This rapid evolution is thought to be driven by the genetic conflict  
389 predicted to exist between meiotic drivers and the rest of the genome. The conflict arises  
390 because the best interest of the driving haplotype (i.e. drive) is at odds with the best interest of  
391 the rest of the genome, which is Mendelian allele transmission (Crow, 1991). The driving  
392 haplotype gains an evolutionary advantage by driving, but this is generally bad for the fitness of  
393 the organism (Zanders and Unckless, 2019). The rest of the genome therefore gains an  
394 evolutionary advantage by suppressing drive. This leads to rapid evolution due to an



395 evolutionary arms race between the drive locus and unlinked genomic suppressors where each  
396 side must constantly innovate (McLaughlin and Malik, 2017).

397

398 In *S. pombe*, the evolutionary innovation of *wtf* genes stems from gene duplications, expansion  
399 and contraction of tandem repeats within the coding sequences, and extensive non-allelic gene  
400 conversion within the family (Eickbush et al., 2019; Hu et al., 2017). We looked for similar  
401 evidence of rapid evolutionary innovation in the *wtf* genes outside of *S. pombe*. As a first step,  
402 we built a maximum likelihood phylogeny of intact *wtf* genes from all four species. For *S.*  
403 *pombe*, we used the genes from the FY29033 isolate as it contains more intact *wtf* genes than  
404 the reference genome strain. We also excluded genes from the unknown functional class of *S.*  
405 *pombe* (*wtf7*, *wtf11*, *wtf14* and *wtf15*) because these genes are widely diverged from each other  
406 and all other *wtf* genes. We observed that the *S. pombe wtf* genes grouped together in a well-  
407 supported clade (Figure 5).

408

409 For the other three species, *wtf* genes did not cluster into species-specific monophyletic clades  
410 (Figure 5). The *S. cryophilus* genes were found distributed within clades of *S. osmophilus*  
411 genes. 37 *S. octosporus* genes grouped together in a well-supported clade. The remaining 11  
412 *S. octosporus* genes grouped together within a well-supported clade that includes 2 *S.*  
413 *osmophilus* genes (Figure 5). Interestingly, this clade of 13 genes contains most (11/14) of the  
414 *S. octosporus wag*-associated intact *wtf* genes and two *S. osmophilus* genes in the clade are  
415 also *wag*-associated. Overall, these patterns are consistent with a history dominated by  
416 species-specific duplications and/or species-specific homogenization mediated by non-allelic  
417 gene conversion.

418

419 We next explored the variation of *wtf* gene numbers to address if the variation is due to  
420 extensive overall gene loss since these genes diverged from a common ancestor, variable



421 levels of gene duplication between lineages, or a more complex combination of gene gains and  
422 losses. To explore these possibilities, we first returned to our analyses of synteny. If gene loss  
423 was the predominant driver of variation in *wtf* gene number, we would expect to find that the *wtf*  
424 genes were usually found at a site that also contains a *wtf* gene in one or more additional  
425 species. Novel *wtf* gene duplications are more likely to be lineage specific. As described above,  
426 all but five *wtf* loci found in *S. pombe* exhibit no synteny in other species (Table S12). Similarly,  
427 there are 31, 12, and 2, species-specific *wtf* loci in *S. octosporus*, *S. osmophilus* and *S.*  
428 *cryophilus*, respectively (Table S15). These observations are consistent with novel gene  
429 duplications occurring in the lineages leading to all four species. Independent expansions are  
430 additionally supported by the different genomic contexts of the *wtf* genes in *S. pombe* (Tf-  
431 association) and the other species (*wag* and/or 5S rDNA-association). Gene losses are also  
432 likely within all lineages, as mentioned above for the loss of ancestral *wtf* gene(s) between  
433 *met17* and *clr4* in *S. cryophilus* (Figure 4A).

434

435 We next looked for signatures of non-allelic gene conversion within the newly discovered *wtf*  
436 genes. We started with genes found in synteny with a *wtf* gene in another lineage. These genes  
437 should be orthologous and thus group together in a well-supported clade. Non-allelic gene  
438 conversion, however, can overwrite genes and thus cause them to be more similar to *wtf* genes  
439 at ectopic sites. We focused on *S. octosporus* and *S. osmophilus* as these two species are most  
440 closely related and there are a large number—26—*wtf* loci showing synteny between these two  
441 species (Table S16-S17). We found that none of the genes from syntenic loci group together in  
442 a well-supported clade that excludes genes from other loci (Figure 5, Figure 5-source data 1).  
443 This suggests gene conversion has frequently overwritten genes in one or both of these two  
444 lineages.

445

446 We next analyzed all the genes within *S. octosporus* and *S. osmophilus* for signatures of gene  
447 conversion using the GARD (Genetic Algorithm Recombination Detection) program  
448 (Kosakovsky Pond et al., 2006a). This program builds multiple phylogenetic trees using different  
449 segments of genes. If the entire gene shares the same evolutionary history, the trees  
450 constructed from different parts of the genes should be the same. Ectopic gene conversion,  
451 however, can shuffle variation within a gene family and lead to differences between trees  
452 constructed from different parts of the genes. Consistent with the patterns described above,  
453 GARD detected evidence of non-allelic gene conversion within both *S. octosporus* and *S.*  
454 *osmophilus* (Figure 5-figure supplement 1).

455

456 Finally, we looked for potential evolutionary innovation due to expansion and contraction of  
457 tandem repeats within the coding sequences of the newly identified *wtf* genes. Exon 6 of some  
458 *S. pombe wtf* genes encodes a 7 amino acid sequence that can be repeated in tandem multiple  
459 times (Eickbush et al., 2019). An *S. pombe wtf* gene can drive without this sequence, but the  
460 number of repeat units found can be important for conferring specificity between a  $Wtf^{\text{poison}}$   
461 protein and the  $Wtf^{\text{antidote}}$  protein that neutralizes it (Bravo Núñez et al., 2018a; Nuckolls et al.,  
462 2020). The sequence is thus important for functional innovation of drivers and suppressors. We  
463 looked for amino acid repeats in our candidate *wtf* homologs and found a 7 amino acid  
464 sequence that was repeated a variable number of times in tandem in exon 4 of genes from *S.*  
465 *octosporus* and *S. osmophilus*. We generated sequence logos to visualize both the nucleotide  
466 sequences and amino acid sequences of the repeat in each species (Figure 5-figure  
467 supplement 2, Table S18). We found that the repeat sequences were similar in all three  
468 species, consistent with shared ancestry (Figure 5-figure supplement 2). For example, the *S.*  
469 *pombe* and *S. osmophilus* repeats both have IGNXXXG as the most common amino acid  
470 sequence. The region containing this 7-amino-acid repeat exhibits similar length variability in  
471 three species (Figure 5-figure supplement 2). Hence, like the *S. pombe wtf* drivers, the *wtf*

472 drivers of *S. octosporus* and *S. osmophilus* show signatures of evolutionary innovation via  
473 expansion and contraction of a repetitive coding sequence. Together with previous analyses of  
474 *S. pombe*, our analyses demonstrate an extensive history of evolutionary innovation within the  
475 *wtf* genes. This is consistent with the hypothesis that these genes have a long history as meiotic  
476 drivers.

477

#### 478 ***wtf* genes duplicated to pre-existing 5S rDNA genes**

479 Given their association with dispersed 5S rDNA genes, we hypothesized that the *wtf* genes in  
480 the lineages leading to *S. octosporus*, *S. osmophilus* and *S. cryophilus* may have duplicated to  
481 pre-existing 5S rDNA genes. We propose two recombination models by which this could  
482 happen, ectopic gene conversion and integration of extrachromosomal DNA circles (Figure 6-  
483 Figure supplement 1A and B) (Cohen et al., 2010, 1999, 2006; Cohen and Segal, 2009;  
484 Daugherty and Zanders, 2019; Navrátilová et al., 2008; Paulsen et al., 2018). Under both  
485 models, lineage-restricted *wtf* loci flanked with two 5S rDNA genes (e.g., Species A in Figure  
486 6A) are predicted to have synteny with loci containing a single 5S rDNA gene and no *wtf* genes  
487 in other species (e.g., Species B in Figure 6A). To test this, we first looked at sites where the *S.*  
488 *octosporus* locus contains a 5S-rDNA-flanked *wtf* gene, but the syntenic loci in *S. cryophilus*  
489 and *S. osmophilus* do not. There are 6 such *wtf* loci. In 83% (5 out of 6) of those sites, the *S.*  
490 *cryophilus* and *S. osmophilus* loci contain a 5S rDNA gene (Table S17 and S19). This is  
491 consistent with *wtf* genes duplicating to pre-existing 5S rDNA genes.

492

493 We saw similar evidence of *wtf* gene duplication to pre-existing 5S rDNA genes when we  
494 considered other species comparisons (Figure 6B). For example, we found that in 11 out of 12  
495 sites where *S. osmophilus* has a 5S-rDNA-flanked *wtf* gene but *S. cryophilus* has no *wtf* genes,  
496 there is a 5S rDNA gene in *S. cryophilus* (Figure 6B, Table S19). Overall, these analyses  
497 support the hypothesis that *wtf* genes spread to pre-existing 5S rDNA genes in the lineages

498 leading to *S. octosporus* and *S. osmophilus*. It is important to note, however, that lineage-  
499 specific loss of 5S rDNA-associated *wtf* genes could, and likely do, also contribute to the  
500 patterns described above.

501

### 502 ***wtf* genes in *S. octosporus*, *S. osmophilus* and *S. cryophilus* encode poison and antidote** 503 **proteins**

504 We next examined whether there was functional conservation between the *wtf* genes. There are  
505 relatively few genetic tools available in fission yeasts outside of *S. pombe*. We therefore first  
506 tested the functions of the genes outside of their endogenous species. We previously  
507 demonstrated that the *S. pombe* Wtf4<sup>poison</sup> and Wtf4<sup>antidote</sup> proteins can act in the budding yeast,  
508 *Saccharomyces cerevisiae*. Specifically, expression of the Wtf4<sup>poison</sup> protein kills vegetative *S.*  
509 *cerevisiae* cells, and co-expression of the Wtf4<sup>antidote</sup> protein neutralizes the toxicity of the  
510 Wtf4<sup>poison</sup> protein (Nuckolls et al., 2020). We used this system to test if the *wtf* genes from the  
511 other fission yeast species also encode poison and antidote proteins.

512

513 We cloned coding sequences of the putative poison (encoded by exons 2-5) and antidote  
514 (encoded by exons 1-5) proteins of *S. octosporus wtf25* and *wtf61*, *S. osmophilus wtf19* and  
515 *wtf41* and *S. cryophilus wtf1* under the control of a  $\beta$ -estradiol-inducible promoter on separate  
516 plasmids. We then introduced the plasmids into *S. cerevisiae* and analyzed the phenotypes of  
517 the resulting strains. We found that induction of each of the putative Wtf<sup>poison</sup> proteins, except *S.*  
518 *osmophilus wtf19*, inhibited cell proliferation in *S. cerevisiae* (Figure 7A-C, Figure 7-figure  
519 supplement 1). Moreover, the toxicity of each functional Wtf<sup>poison</sup> protein was partially neutralized  
520 by co-expression of the cognate (i.e., encoded on the same gene) Wtf<sup>antidote</sup> proteins (Figure 7A-  
521 C; Figure 7-figure supplement 1B).

522

523 In *S. pombe*, the Wtf<sup>antidote</sup> protein encoded by one *wtf* gene generally cannot neutralize the  
524 Wtf<sup>poison</sup> protein encoded by a different *wtf* gene (Bravo Núñez et al., 2020b, 2018a; Hu et al.,  
525 2017). Instead, a high level of sequence identity appears to be required for a Wtf<sup>antidote</sup> protein to  
526 co-assemble with and neutralize a Wtf<sup>poison</sup> protein (Nuckolls et al., 2020). We tested if this  
527 feature was shared with *wtf* genes outside of *S. pombe*. We tested proteins from five pairs of *wtf*  
528 genes. Excluding the antidote protein-specific residues encoded in exon 1, the proteins encoded  
529 by each pair share from 13-76% amino acid identity. Like our previous observations in *S.*  
530 *pombe*, we found that Wtf<sup>antidote</sup> proteins did not neutralize non-cognate Wtf<sup>poison</sup> proteins (Figure  
531 7-figure supplement 2A-E).

532

533 We imaged tagged versions of the *S. octosporus* Wtf25 proteins to see if the localization of the  
534 proteins in *S. cerevisiae* was similar to what we previously observed for *S. pombe* Wtf4 proteins.  
535 *S. octosporus* Wtf25<sup>poison</sup>-GFP and Wtf25<sup>antidote</sup>-mCherry were both functional (Figure 7A). *S.*  
536 *octosporus* Wtf25<sup>poison</sup>-GFP was distributed throughout the cytoplasm, with some potential  
537 endoplasmic reticulum localization, similar to what we previously observed for *S. pombe*  
538 Wtf4<sup>poison</sup>-GFP (Figure 7D, Figure 7-figure supplement 3). The *S. octosporus* Wtf25<sup>antidote</sup>-  
539 mCherry localization was more restricted. We observed large aggregates outside the vacuole  
540 and some signal inside the vacuole (Figure 7E, Figure 7-figure supplement 3). This is slightly  
541 different from our previous observations with *S. pombe* Wtf4<sup>antidote</sup> as that protein mostly  
542 accumulated outside the vacuole in the insoluble protein deposit, with less Wtf4<sup>antidote</sup> protein  
543 observed within the vacuole (Nuckolls et al., 2020)

544

545 When the *S. octosporus* Wtf25<sup>poison</sup>-GFP and Wtf25<sup>antidote</sup>-mCherry proteins were co-expressed,  
546 we observed some colocalization of the proteins (Figure 7F, Figure 7-figure supplement 3). The  
547 colocalized proteins appear to be trafficked to the vacuole. These localization patterns are  
548 similar to our previous observations of *S. pombe* Wtf4 proteins where the Wtf4<sup>antidote</sup> co-

549 assembles with the Wtf4<sup>poison</sup> and causes a change of localization of the Wtf4<sup>poison</sup> protein. With  
550 *S. pombe* Wtf4 proteins, however, the co-expressed poison and antidote proteins mostly  
551 accumulate outside the vacuole at the insoluble protein deposit, with less protein entering the  
552 vacuole (Nuckolls et al., 2020). Overall, our results are consistent with broad, but not absolute,  
553 functional conservation of the Wtf proteins, despite extensive amino acid divergence.

554

### 555 **Wtf genes can cause meiotic drive in *S. octosporus***

556 We next formally tested if *wtf* genes could cause meiotic drive outside of *S. pombe* using *S.*  
557 *octosporus*, which among *S. octosporus*, *S. osmophilus* and *S. cryophilus* is the only one with  
558 available genetic tools (Seike and Niki, 2017). According to our long-read RNA-seq data, only a  
559 small fraction of *wtf* genes in *S. octosporus* have substantial levels of the short transcript  
560 isoform (poison isoform) initiated from within intron 1 (Figure 2-figure supplement 3). We  
561 preferentially tested such genes as we reasoned that a sufficiently high expression level of the  
562 poison is essential for drive.

563 We successfully deleted seven *wtf* genes (*wtf25*, *wtf68*, *wtf33*, *wtf60*, *wtf46*, *wtf21* and *wtf62*, in  
564 the order of decreasing expression levels of the poison isoform) in heterothallic haploid strains  
565 of both mating types. No growth phenotypes were observed for these deletion mutants. We then  
566 analyzed whether any of the deletions affected viability of spores derived from homozygous and  
567 heterozygous crosses using octad dissection analysis (*S. octosporus* generates eight spores  
568 per meiosis due to a post-meiotic mitosis prior to spore packaging (Chiu, 1996)).

569

570 In homozygous crosses, none of the deletions significantly altered spore viability comparing to  
571 the wild-type control (Figure 8, Table S20). Thus, like previous observations for *S. pombe wtf*  
572 genes (Bravo Núñez et al., 2018a; Hu et al., 2017; Nuckolls et al., 2017), these seven *S.*  
573 *octosporus wtf* genes are not required for mating, meiosis, or sporulation. In heterozygous  
574 crosses, deletion of *wtf25*, *wtf68* or *wtf33* caused notable and significant spore viability reduction

575 (> 5% spore viability reduction and  $P < 0.05$ , Fisher's exact test) and also resulted in significant  
576 allele transmission bias against the *wtf* deletion allele relative to the wild-type *wtf+* allele ( $p <$   
577  $0.05$ , exact binomial test; Table S21-23, Figure 8-9, Figure 9-Figure supplement 1-2). These  
578 results indicate that *wtf25*, *wtf68*, and *wtf33* are active meiotic drivers.

579

580 To further explore the octad dissection data, we classified octads derived from heterozygous  
581 crosses according to the number of viable spores with a *wtf* gene deletion ("R", antibiotic  
582 resistant) and the number of viable spores without a *wtf* gene deletion ("S", antibiotic sensitive)  
583 in an octad. For example, an octad with 7 viable spores can be classified as either the 4R3S  
584 type or the 3R4S type. If spore viability is not affected by *wtf* gene deletion, the ratios of 4R3S to  
585 3R4S, 4R2S to 2R4S, 4R1S to 1R4S, and 4R0S to 0R4S should be about 1:1. For *wtf25*, *wtf68*,  
586 and *wtf33*, the three genes deemed as active meiotic drivers based on the analysis of overall  
587 spore data, most of these octad type ratios significantly deviate from 1:1 ( $P < 0.05$ , exact  
588 binomial test; Figure 9C, Figure 9-figure supplements 1-2). The 4R2S to 2R4S ratio of *wtf60* and  
589 the 4R3S to 3R4S ratio of *wtf46* also significantly deviate from 1:1 (Figure 9-figure supplement  
590 3-4, Tables S24-S25), suggesting that *wtf60* and *wtf46* may have weak meiotic driver activities.  
591 *wtf21* and *wtf62* did not cause significant deviation of octad type ratios (Figure 9-figure  
592 supplements 5-6, Table S26-S27), consistent with the low expression levels of the poison  
593 isoforms of these two genes (Figure 2-figure supplement 3). In fact, the levels of allele  
594 transmission bias favoring the *wtf+* allele appear to be correlated with the expression levels of  
595 the poison isoform (Figure 9D).

596

### 597 ***S. octosporus wtf25* is a poison and antidote meiotic driver**

598 To determine whether an active *wtf* gene in *S. octosporus* can cause meiotic drive at an ectopic  
599 genomic locus, we constructed an integrating plasmid carrying a 2.5-kb genomic region  
600 containing *wtf25* together with its upstream and downstream flanking 5S rDNA genes and



601 integrated the plasmid at the *leu1* locus in the *wtf25* deletion background. Octad dissection  
602 analysis indicated that *wtf25* integrated at the *leu1* locus can act as a meiotic driver in a  
603 heterozygous cross (*leu1Δ::wtf25/leu1*) and the level of meiotic drive was comparable to that  
604 caused by the endogenous *wtf25* gene (Figure 10B). This result indicates that *S. octosporus*  
605 *wtf25* can act in a locus-independent manner like the *S. pombe wtf* drivers.  
606  
607 *wtf25* can express a long transcript isoform and a short transcript isoform through alternative  
608 transcriptional initiation (Figure 2B). Based on what is known about the *S. pombe wtf* genes and  
609 our analyses of *S. octosporus wtf25* in *S. cerevisiae* (Figure 7), we hypothesized that the long  
610 and short isoforms encode antidote and poison proteins, respectively (Hu et al., 2017; Nuckolls  
611 et al., 2017). We introduced point mutations into the predicted start codons of the long and short  
612 isoforms of *wtf25* integrated at the *leu1* locus and analyzed the effects of the mutations on spore  
613 viability (Figure 10A). The mutant with the predicted start codon in the short transcript isoform  
614 mutated (ATG to GCG, methionine to alanine), referred to as *wtf25<sup>antidote-only</sup>*, was unable to kill  
615 spores not inheriting it in a *wtf25* deletion background (Figure 10B, Table S28). This supports  
616 our hypothesis that the short transcript encodes a spore-killing poison.  
617  
618 Analogously, we mutated the predicted start codon in the long transcript isoform and generated  
619 the *wtf25<sup>poison-only</sup>* mutant allele (Figure 10A). We could not obtain transformants of the plasmid  
620 carrying this mutant allele in the *wtf25* deletion background, possibly due to self-killing. Instead,  
621 we integrated the plasmid at the *leu1* locus in the wild-type background and crossed the  
622 resulting strain to a *wtf25Δ* strain. As a control, we integrated an empty vector at the *leu1* locus  
623 in the wild-type background and crossed the resulting strain to a *wtf25Δ* strain. Compared to the  
624 control, *wtf25Δ* spores (spores not inheriting the wild-type *wtf25* at the endogenous locus)  
625 derived from diploids carrying the *wtf25<sup>poison-only</sup>* allele suffered markedly more severe viability  
626 loss (Figure 10C). Among them, the *wtf25Δ* spores that also inherited the *wtf25<sup>poison-only</sup>* mutant



627 allele at the *leu1* locus were all inviable. These results further support the model that the short  
628 isoform encodes a poison protein that confers killing but not protection. In addition, they  
629 demonstrate that the long isoform is required for protection against spore killing.

630

## 631 **Discussion**

### 632 ***wtf* genes are ancient meiotic drivers**

633 Our analyses indicate that *wtf* genes were present in the common ancestor of *S. octosporus*, *S.*  
634 *osmophilus*, *S. cryophilus* and *S. pombe*. As these species are estimated to have diverged ~119  
635 million years ago (Rhind et al., 2011), we propose that the *wtf* gene family is over 100 million  
636 years old. Our results suggest that the gene family has contained active meiotic driver genes  
637 throughout their history in fission yeasts. First, the gene family exhibits several signatures of the  
638 rapid evolutionary innovation typified by genes involved in genetic conflicts (Figure 5, Figure 5-  
639 figure supplements 1-2); (Burt and Trivers, 2006; McLaughlin and Malik, 2017) . Also, genes  
640 from all four species encode both poison and antidote proteins, like the known drivers in *S.*  
641 *pombe* (Figure 7). In addition, genes from at least three species contain the FLEX regulatory  
642 motif upstream of the open reading frame that encodes a poison protein, suggesting the genes  
643 are expressed in meiosis (Figure 2). Our RNA sequencing data confirms this hypothesis in *S.*  
644 *octosporus* (Figure 2B, Figure 2-figure supplement 2). And finally, we demonstrate that the *S.*  
645 *octosporus* genes cause meiotic drive when heterozygous (Figure 9).

646

647 We have been unable to trace the history of the *wtf* gene family farther back than the ancestor  
648 of *S. octosporus*, *S. osmophilus*, *S. cryophilus* and *S. pombe*. It is possible that the genes were  
649 born *de novo* within this lineage. Alternately, it is possible the genes may also have entered the  
650 lineage via horizontal gene transfer. Distinguishing these possibilities will likely prove difficult.  
651 The old age and rapid evolution of the gene family largely restrict our ability to reconstruct the  
652 sequence of the ancestral gene(s) with confidence. In addition, given that the genes encode

653 poison and antidote proteins, it is possible that any potential extant homologs outside of fission  
654 yeast will have experienced a history of genetic conflict and could be quite diverged from their  
655 ancestral state as well.

656

### 657 **Repeat facilitated expansion of the *wtf* gene family**

658 Our results indicate that the ancestor of the four species contained at least 2 *wtf* genes, and the  
659 extant species carry between 5-83 *wtf* genes, including pseudogenes. Our analyses are  
660 consistent with novel gene duplications occurring in the lineages leading to all four species. The  
661 *wtf* genes are compact and can autonomously cause drive. These features likely facilitated their  
662 spread within genomes. In this study, we show that non-allelic recombination using repetitive 5S  
663 rDNA sequences has likely facilitated the expansion of the *wtf* gene family in *S. octosporus* and  
664 *S. osmophilus*. This recombination could be non-allelic gene conversion but could also be  
665 crossovers involving extrachromosomal circles as many *wtf* genes are flanked by direct repeats  
666 of 5S rDNA genes (Figure 3, Figure 6). The later pathway was recently implicated in the spread  
667 of Rsp-like meiotic drive associated sequences in *Drosophila* species (Sproul et al., 2020). The  
668 newly formed *wtf* gene duplicates could be maintained at a high rate by selection given their  
669 potential to cause drive or to suppress drive of other *wtf* genes with a similar sequence.

670

671 It may be relevant that both the Tf LTRs and the dispersed 5S rDNA genes cluster spatially in  
672 the nucleus. The Tf LTR transposons are bound by CENP-B family proteins and are clustered to  
673 a nuclear domain known as the Tf body in a process that requires the CENP-B family protein  
674 Cbp1, the histone lysine H3-K4 methyltransferase Set1 and the Ku protein Pku80 (Johansen  
675 and Cam, 2015). The 5S rDNA genes are transcribed by RNA polymerase III (pol III) and cluster  
676 with other pol III transcribed-genes within the nucleus (Daulny et al., 2016; Haeusler and  
677 Engelke, 2006). Such clustering may promote the duplication of *wtf* genes to novel repeat-  
678 associated sites in the genome. The clusters could potentially affect recombination outcomes.

679 Factors found in the clusters could limit crossover recombination events between non-allelic  
680 sites that would generate costly chromosome rearrangements. The clusters could also facilitate  
681 non-allelic gene conversion that helps enable the rapid evolution of the *wtf* genes (Eickbush et  
682 al., 2019; Hu et al., 2017).

683

684 It is also interesting to note that *Rsp-like* sequences of *Drosophila* mentioned above also spread  
685 to distributed repetitive sequences that cluster within nuclei (Herbette et al., 2021). Furthermore,  
686 genes of the *Dox* gene family in *D. simulans* are associated with satellite DNA 359 which has  
687 been proposed to have facilitated expansion of the family (Muirhead and Presgraves, 2021;  
688 Vedanayagam et al., 2021). Experimental analyses of the effect of clustered repeats on  
689 sequence duplication and ectopic recombination outcomes are required to test these ideas  
690 (Muirhead and Presgraves, 2021; Vedanayagam et al., 2021).

691

### 692 **Model for the long-term persistence of *wtf* drivers**

693 Theoretical models of drive generally consider a single, stationary drive locus (Crow, 1991). The  
694 reality of the long-term evolution of the *wtf* drivers is a great deal more complex. The *wtf* drivers  
695 are part of a large, rapidly evolving gene family that also includes drive suppressors (Bravo  
696 Núñez et al., 2018a). We propose that this complexity creates a cycle of driver death and rebirth  
697 analogous to the mythological phoenix (Figure 11). *wtf* drivers are perpetually reborn anew via  
698 gene duplication and rapid evolution of existing genes. This rebirth allows the genes to evade  
699 extinction by short-circuiting the two main paths to extinction mentioned earlier: extinction  
700 following suppression and extinction following fixation. We discuss both paths in more detail  
701 below.

702

703 We propose that the number and diversity of the *wtf* drivers create a significant challenge for the  
704 evolution of suppressors. The mapped genic suppressors of *wtf* drivers are other *wtf* genes.

705 Importantly, however, the *wtf*-mediated suppression in all known cases is highly specific in that  
706 the antidotes only neutralize poison proteins with amino acid sequences that are highly similar  
707 to the antidote. Because of this, even changing two amino acids is sufficient to disrupt the ability  
708 of a  $Wtf^{\text{antidote}}$  to neutralize a  $Wtf^{\text{poison}}$  (Bravo Núñez et al., 2018a). In addition, the fitness benefits  
709 of suppressing one driver are minimized if there are still several active drivers (Bravo Núñez et  
710 al., 2020b). It is not yet clear if suppressors could act more broadly against multiple *wtf* drivers.  
711 Sequence-directed transcriptional silencing via installation of heterochromatin, similar to that  
712 used to control transposons, could be a potential route for widespread silencing of *wtf* drivers  
713 (Mizuguchi et al., 2017). However, silencing of *wtf* drivers would not be trivial to evolve for  
714 several reasons (Nuckolls et al., 2021). In particular, the regions linked to *wtf* genes benefit from  
715 their drive. Because of this, variants that resisted heterochromatin installation and *wtf* silencing  
716 would have an advantage over those that were permissive to heterochromatin installation.  
717  
718 Driver fixation is a second route to driver extinction. Population surveys of *wtf* gene diversity are  
719 currently available only in *S. pombe* where the entire complement of *wtf* genes has been  
720 assembled for 4 isolates (Eickbush et al., 2019; Hu et al., 2017). This limited analysis suggested  
721 that the rapid evolution of *wtf* genes makes fixation of any given sequence unlikely. Within this  
722 group, there is only one locus (*wtf4*) where all four isolates contain a driver. The sequence of  
723 the *wtf4* driver, however, is not fixed. Even the two most similar *wtf4* drivers, from the reference  
724 genome (*Sp*) and the *S. kambucha* isolate (*Sk*), are distinct drivers in that the antidote from *Sp*  
725 *wtf4* does not neutralize the poison from *Sk wtf4* and *vice versa* (Nuckolls et al., 2017). The non-  
726 allelic gene conversion of *wtf* genes and the expansion and contraction of repetitive coding  
727 sequence that largely drive the evolution of the *wtf* genes in *S. pombe* also occurred in the *S.*  
728 *octosporus* and *S. osmophilus* lineages. Those lineages also have many (>20) *wtf* genes, so  
729 fixation may also be unlikely within those species. *S. cryophilus*, however, has fewer *wtf* genes

730 and has lost the repetitive coding sequence shared by the other drivers, so fixation may be  
731 more likely in that species.

732

733 An alternate hypothesis to explain the long-term persistence of the *wtf* drivers is that the genes  
734 are not merely selfish parasites. It is possible that *wtf* drivers promote fitness in some way that  
735 we have yet to discover. This theoretical additional function of the *wtf* genes could have  
736 promoted their long-term maintenance in fission yeast genomes. It is important to note,  
737 however, that genes do not need to promote fitness to be maintained in genomes and there is  
738 currently no evidence supporting a role of *wtf* drivers in promoting fitness, except in cases  
739 where they suppress other *wtf* drivers.

740

#### 741 **Other ancient drivers?**

742 Currently, the *wtf* drivers are unique amongst cloned meiotic drivers in both their abundance  
743 within genomes and their longevity over evolutionary time. This, however, may very well  
744 change. Currently, many meiotic drive loci are unmapped. Many more drivers that confer more  
745 subtle transmission biases also likely remain undetected (Wei et al., 2017). As more genomes  
746 are fully assembled and more drivers are mapped, it seems plausible that the *wtf* gene family  
747 will be joined by other equally abundant and persistent families of meiotic drivers.

748

#### 749 **Material and Methods**

750

##### 751 **Nanopore sequencing and assembly of the *S. osmophilus* genome**

752 To sequence the *S. osmophilus* genome, we extracted genomic DNA with the QIAGEN  
753 Genomic-tip kit. We then used a standard ligation sequencing prep and kit (SQK-LSK109;  
754 Oxford Nanopore Technologies), including DNA end repair using the NEB End Prep Enzyme,  
755 FFPE prep with the NEB FFPE DNA repair mix, and ligation using NEB Quick Ligase. We

756 sequenced using two Flongle Sequencers and performed base calling with guppy version 2.1.3.  
757 This generated approximately 521 megabases of sequence or approximately 40x coverage. We  
758 then performed de novo assembly pathway using canu v1.8 and the ovl overlapper with a  
759 predicted genome size of 13 mb and a corrected error rate of 0.12. We corrected our assembly  
760 using pilon with paired end illumina data generated with the same DNA. We assembled 11  
761 nuclear contigs with a total length of 11.3 mb and one mitochondrial contig that was 68 kb in  
762 length. Assembly statistics were generated using an existing perl script  
763 ([https://github.com/SchwarzEM/ems\\_perl/blob/master/fasta/count\\_fasta\\_residues.pl](https://github.com/SchwarzEM/ems_perl/blob/master/fasta/count_fasta_residues.pl)). The  
764 assembled genome scored at 89% complete with BUSCO v3.0.2 which is comparable to the  
765 score for the closely related species *S. octosporus* (Simão et al., 2015). Base called reads were  
766 deposited on the SRA under project accession code PRJNA839783.

767

## 768 **RNA sequencing and Nanopore cDNA sequencing**

### 769 **Sample preparation**

770 For RNA sequencing and ONT (Oxford Nanopore Technologies) cDNA sequencing of *S.*  
771 *octosporus* diploid cells undergoing azygotic meiosis, we crossed DY44617 and DY44598 on a  
772 SPASK plate (1% glucose, 7.3 mM KH<sub>2</sub>PO<sub>4</sub>, vitamins, 45 mg/L of leucine, adenine, uracil,  
773 histidine and lysine) for about 12 hours. Cells were spread on YES plates (0.5% yeast extract,  
774 3% glucose, 200 mg/L of leucine, adenine, uracil and histidine) containing nourseothricin (NAT)  
775 and G418 (YES+NAT&G418) for diploid cell selection. After 3 days, colonies grown up on  
776 YES+NAT&G418 plates were collected and spread on YES plates. After 24 hours, cells were  
777 washed off from YES plates and spread on SPASK plates for azygotic meiosis induction.  
778 Approximately 5 OD<sub>600</sub> units of cells were harvested and snap frozen using liquid nitrogen 19  
779 hours after the start of meiosis induction.

780

### 781 **RNA extraction**

782 All collected cells were thawed on ice for about 5 minutes and then washed once with chilled  
783 DEPC water. The cell pellets were resuspended with TES buffer (10 mM Tris pH 7.5, 10 mM  
784 EDTA pH 8.0, 0.5% SDS), and mixed with acidic phenol-chloroform (1:1) immediately. The  
785 samples were incubated in a 65°C heat block for 1 hour. Then the samples were centrifuged at  
786 4°C, and the aqueous phase was collected. The aqueous phase was then treated with phenol-  
787 chloroform (1:1) and chloroform:isoamyl alcohol (24:1) successively. 3 M NaAc (pH 5.2) and  
788 isopropanol were added to the aqueous phase and mixed thoroughly by inverting. The mixture  
789 was stored at -20°C overnight and then centrifuged at 4°C. After centrifuging, the supernatants  
790 were removed, and the RNA pellets were washed with 70% ethanol. RNA samples were  
791 dissolved in DEPC water after air-drying.

792

### 793 **RNA sequencing**

794 For RNA sequencing, we prepared total RNA from *S. octosporus* cells undergoing azygotic  
795 meiosis as described above. Sequencing library construction and Illumina 150-bp paired-end  
796 sequencing were performed by Annoroad Gene Technology (Beijing, China). The raw  
797 sequencing reads were processed using fastp (version:0.20.0), with default parameters. The  
798 cleaned reads were mapped to a high-quality *S. octosporus* reference genome ([http://bifx-](http://bifx-core.bio.ed.ac.uk/~ptong/genome_assembly/oct_genome.fa)  
799 [core.bio.ed.ac.uk/~ptong/genome\\_assembly/oct\\_genome.fa](http://bifx-core.bio.ed.ac.uk/~ptong/genome_assembly/oct_genome.fa)) using STAR (version: 2.6.0a) with  
800 the following settings: '--alignIntronMin 29 --alignIntronMax 819 --outFilterMultimapNmax 1 --  
801 outFilterMismatchNmax 0 --alignEndsType EndToEnd' (Dobin et al., 2016). Illumina  
802 sequencing data were deposited at NCBI SRA under the accession number SRR17543073.

803

### 804 **Long-read cDNA sequencing**

805 For long-read cDNA sequencing using the Oxford Nanopore Technologies (ONT) platform, we  
806 prepared total RNA as described above. Sequencing library construction and ONT cDNA  
807 sequencing were performed by Biomarker Technologies (Qingdao, China). Through processing

808 the reads using pycloppe (version 2.3.1), we obtained 2,839,411 full-length reads. We  
809 performed further data analysis using FLAIR (Full-Length Alternative Isoform analysis of RNA,  
810 version 1.5) (Tang et al., 2020). FLAIR was designed to perform reads mapping, reads  
811 correcting, and isoform clustering for noisy long reads generated by ONT cDNA sequencing,  
812 and it can be run optionally with short-read RNA sequencing data to help increasing the  
813 accuracy of splicing site identification in isoforms. We mapped full-length reads to the *S.*  
814 *octosporus* reference genome mentioned above using ‘flair.py align’ submodule with default  
815 parameters. The splicing junction information generated by short-read RNA sequencing was  
816 firstly extracted using a FLAIR script called “junctions\_from\_sam.py” from the reads mapping  
817 SAM file then submitted to “flair.py correct” submodule. Finally, we generated high-quality  
818 transcript information by running “flair.py collapse” submodule with default parameters (Tang et  
819 al., 2020). The ONT cDNA reads mapping results were visualized using the Integrative  
820 Genomics Viewer (IGV) (Robinson et al., 2011) (an example is shown in Figure 2B) and the  
821 transcripts generated by FLAIR were used for *wtf* and *wag* gene structure annotation polishing.  
822 ONT cDNA sequencing data were deposited at NCBI SRA under the accession number  
823 SRR17543072.

824

### 825 ***S. osmophilus* genome annotation.**

826 For *S. osmophilus*, we annotated all the coding sequences with the Augustus gene prediction  
827 software webpage (Stanke et al., 2006) (<http://bioinf.uni-greifswald.de/webaugustus/>). First, we  
828 trained Augustus software with *S. octosporus* genome from Tong et al., 2019, and we uploaded  
829 the cDNA sequences of *S. octosporus* genes from (Rhind et al., 2011). This training set allowed  
830 Augustus to construct a model to then predict *S. osmophilus* genes. Augustus annotated the  
831 predicted exons and introns of all the genes in *S. osmophilus* genome found in Figure 1-source  
832 data 2. To match *S. osmophilus* genes with orthologous genes within *S. octosporus*, *S.*  
833 *cryophilus* and *S. pombe*, we extracted all the predict translations of *S. osmophilus* genes and



834 used OrthoVenn2 to find orthologs for each genes (Xu et al., 2019). The orthologs are reported  
835 in Figure 1-source data 3.

836

### 837 **Calculating amino acid identity between *Schizosaccharomyces* species.**

838 To calculate the percentage amino acid identity shared between proteins of the different  
839 *Schizosaccharomyces* species, we used BLASTp (default parameters) to compare each protein  
840 sequence to a protein database created for each genome (Altschul et al., 1990). For example,  
841 we compared all the genes of *S. osmophilus* with the *S. octosporus* database. We then  
842 compared all the genes of *S. octosporus* with the *S. osmophilus* database. The best hit was  
843 saved for each gene from the reciprocal BLASTp to calculate the percentage of identity between  
844 two orthologs (Figure 1-source data 3). We then calculate the mean of all the percentage  
845 identity (all the genes) between the two genomes. The percentage of identity for each paired  
846 comparisons between genomes can be found in Table S1. This percentage of identity was used  
847 to verify and construct the *Schizosaccharomyces* phylogeny in Figure 1B in concordance with  
848 previously published results (Brysch-Herzberg et al., 2019; Rhind et al., 2011).

849

### 850 **Sequence homology search**

851 To find *wtf* genes outside of *S. pombe*, we performed a PSI-BLAST search within the  
852 *Schizosaccharomyces* species with the *S. pombe wtf4* gene as a query (E-value threshold 0.05,  
853 Word size=3, matrix=BLOSUM62, gap existence=11, gap extension=1, PSI-BLAST  
854 threshold=0.005) (Altschul et al., 1997). We repeated the search until no new significant hits  
855 were found (E-value threshold <0.05). Then we perform a BLASTn search using novel *wtf*  
856 genes from *S. octosporus*, *S. osmophilus* and *S. cryophilus* as queries to find additional *wtf*  
857 genes and pseudogenes within each genome (E-value threshold <0.05) (Altschul et al., 1990).

858

859 To search for *S. japonicus wtf* genes, we used sequences of *S. octosporus*, *S. cryophilus*, and *S.*  
860 *pombe wtf* genes as query for BLAST with *S. japonicus* (Altschul et al., 1990; Rhind et al.,  
861 2011). This yielded no hits. We also carried out a MEME motif search of all the available *wtf*  
862 genes sequences and then perform PSI-BLAST to find genes with *wtf* genes motifs in *S.*  
863 *japonicus* (parameters: expect threshold: 10, word size: 3, matrix: BLOSUM62, gap costs =  
864 existence: 11, extension: 1, PSI-BLAST threshold: 0.005) (Altschul et al., 1997). This also  
865 yielded no conclusive hits. Finally, we manually inspected *S. japonicus* genes defined as  
866 lineage-specific by OrthoVenn2 to search for multi-exon (5-6) candidate genes with a potential  
867 alternate translational start site in intron 1 or exon 2, similar to the *wtf* drivers (Xu et al., 2019).  
868 This search also yielded no promising hits.

869

#### 870 ***wtf*, *wag*, LTR and 5S rDNA gene annotation *S. octosporus wtf* and *wag* genes**

871 To annotate *wtf* genes in *S. octosporus* we used two different approaches listed below.  
872 First, we aligned the short-read RNA-sequencing data described above to the *S. octosporus*  
873 genome using Geneious Prime® 2021.1.1 (<https://www.geneious.com>). For each *wtf* and *wag*  
874 gene identified, we manually viewed RNA-sequencing data and used it to annotate the exons  
875 and introns. For genes and pseudogenes with insufficient sequence coverage, we determined  
876 coding sequences using homology to other *wtf* or *wag* genes that we were able to annotate with  
877 RNA-sequencing data. Specifically, we first aligned the unannotated genes with annotated  
878 genes using MAFFT with parameters L-INS-I (200PAM scoring matrix/k=2; Gap open penalty of  
879 2; offset of 0.123) (Kato, 2002; Kato and Standley, 2013). We then used the alignment to  
880 manually inspect genes to annotate splicing sites and predict coding sequences. Genes with  
881 incomplete coding sequences, including those determined to have lost splice sites, were  
882 considered pseudogenes.

883

884 Secondly, we further polished the annotation of *wtf* and *wag* genes according to the ONT cDNA  
885 sequencing data. We generated high-quality transcript information using the FLAIR pipeline as  
886 described above and we predicted the longest open reading frame of these transcripts using  
887 TransDecoder (version: 5.5.0). We manually compared the coding frame of FLAIR transcripts  
888 mapped at the *wtf* or *wag* loci with the gene annotation obtained in the first approach and  
889 refined the gene structure annotation. Both pipeline of annotation gave similar results, we  
890 resolved manually the discrepancies between the different annotations and reported the  
891 annotation of *S. octosporus wtf* genes in Table S2.

892

### 893 ***S. osmophilus wtf* and *wag* genes annotations**

894 We first annotated *S. osmophilus wtf* and *wag* genes using Augustus prediction (trained with *S.*  
895 *octosporus* data) (Stanke et al., 2008). We then manually inspected the annotations using  
896 alignments of all the *S. osmophilus wtf* or *wag* genes generated by MAFFT (L-INS-I; 200PAM  
897 scoring matrix/k=2; Gap open penalty of 2; offset of 0.123) (Katoh, 2002; Katoh and Standley,  
898 2013). Genes with 4 exons were annotated as pseudogenes when a 5<sup>th</sup> exon was not predicted  
899 by Augustus and was found to be absent after inspection of the alignment. In many of these  
900 pseudogenes, the 5<sup>th</sup> exons were degenerate with accumulated stop codons.

901

### 902 **5S rDNA annotation**

903 To annotate 5S rDNA in the genomes of *S. octosporus* and *S. cryophilus* we used BLASTn  
904 using annotated 5S rDNA sequences in each genome as a query (Altschul et al., 1990). For *S.*  
905 *osmophilus*, we used an *S. octosporus* 5S rDNA gene as a query. In all genomes, hits with 70-  
906 100% DNA sequences identity were considered 5S rDNA genes. All 5S rDNA can be found in  
907 GTF files of annotated genomes (Figure 1-source data 4 to 6)

908

### 909 **LTR annotation**

910 To annotate Tf transposon LTRs in *S. osmophilus*, we used BLASTn to search for sequences  
911 similar to the already annotated LTRs found in *S. cryophilus* and *S. pombe* (Rhind et al., 2011).  
912 We found many hits in *S. osmophilus* (E-value less than 0.05). In addition, we also used the  
913 LTR\_retriever program which identified additional LTRs in *S. osmophilus* (Ou and Jiang, 2018).  
914 All the LTR identified are reported in Table S9.

915

### 916 ***de novo* discovery and genome-wide scanning of the FLEX motif (Mei4-binding motif)**

917 To identify Mei4-binding motifs, we firstly compiled a list of 70 *S. pombe* Mei4 target genes.  
918 These genes were selected as Mei4 target genes based on the following criterion: (1) they were  
919 shown to contain Mei4 ChIP-seq peaks at two time points during meiosis (3 hour and 4 hour into  
920 meiosis) (Alves-Rodrigues et al., 2016); and (2) they are among the middle meiosis genes  
921 whose transcript levels were reduced in *mei4Δ* and increased when Mei4p was overexpressed  
922 (Mata et al., 2007). Among these 70 *S. pombe* Mei4 target genes, we further selected 49 genes  
923 that have single copy orthologs in other fission yeast species according to Rhind et al 2011 and  
924 the result of our orthoVenn2 analysis (Table S6). We extracted the 1000-bp sequences  
925 upstream of the start codon of these 49 genes in each species and performed *de novo* motif  
926 discovery using MEME (<http://meme-suite.org/index.html>) (Bailey and Elkan, 1994). Manual  
927 inspection of all resulting motifs identified FLEX motifs in *S. pombe*, *S. octosporus*, *S.*  
928 *osmophilus* and *S. cryophilus* (Figure 2-figure supplementary 2A). We then combined all 196  
929 genes in the four fission yeast species as input for *de novo* motif discovery and the resulting 11-  
930 bp FLEX motif was submitted to the FIMO tool (Grant et al., 2011) for genome-wide motif  
931 scanning. A total of 33089 FIMO hits were found in the four fission yeast species using the  
932 default *P* value cutoff of 1E-4. By comparing the number of hits in Mei4 target genes and the  
933 number of hits in other genes, we chose *P* value < 3E-6 as the criterion for deeming a FIMO hit  
934 confident. In the reference *S. pombe* genome, there are a total of 476 FIMO hits meeting this  
935 criterion. Among the 49 *S. pombe* genes used for motif discovery, 59.2% (29 out of 49 genes)

936 harbor at least one confident hit in the 1000-bp region upstream of the start codon, whereas for  
937 the other *S. pombe* genes, 6.5% (328 out of 5073 genes) harbor at least one confident hit in the  
938 1000-bp region upstream of the start codon ( $P = 7.47E-22$ , Fisher's exact test). The statistics of  
939 FIMO hits is shown in Table S7, and all confident FIMO hits are listed in Table S8.

940

#### 941 **DNA Sequence alignments and phylogenic tree construction.**

942 All DNA or amino acid sequence alignments were constructed using the MAFFT (Katoh, 2002;  
943 Katoh and Standley, 2013) plugin in Geneious Prime® 2021.1.1 with parameters L-INS-I  
944 (200PAM scoring matrix/k=2; Gap open penalty of 2; offset of 0.123). We generated trees using  
945 the PhyML 3.0 (Guindon et al., 2010) in the webpage <http://www.atgc-montpellier.fr/phyml/>. The  
946 substitution model used was selected by Smart model Selection which calculates an AIC  
947 (Akaike Information Criterion) for each substitution model and then selects the best model for  
948 the dataset (Akaike, 1998; Lefort et al., 2017). The starting tree for each phylogeny was  
949 generated by BIONJ, an improved version of neighbor-joining (Gascuel, 1997). The trees were  
950 then improved with NNI (nearest neighbor interchange) (Joseph Felsenstein, 2004). The branch  
951 support was calculated by Shimodaira-Hasegawa-like approximate likelihood ratio test (SH-like  
952 aLRT) (Anisimova and Gascuel, 2006). Then the trees were rooted by midpoint using FigTree  
953 v1.4.4 (<http://tree.bio.ed.ac.uk/software/figtree>).

954

#### 955 **Analyses of repetitive regions within *wtf* genes**

956 We aligned the full length of all *S. octosporus*, *S. osmophilus wtf* genes within each species  
957 using MAFFT with parameters L-INS-I (200PAM scoring matrix/k=2; Gap open penalty of 2;  
958 offset of 0.123) (Katoh, 2002; Katoh and Standley, 2013) using Geneious Prime® 2021.1.1  
959 (<https://www.geneious.com>). We then manually identified the repeat region within the  
960 alignments and manually quantified the number of bases within the repeat.

961

962 To obtain sequence logos of *S. octosporus* and *S. osmophilus* repeats in exon 4, we extracted  
963 the first complete repeat for all *wtf* genes containing a repeat. We then separately aligned all the  
964 *S. octosporus* and *S. osmophilus* repeats to produce FASTA files (Figure 5-supplement 2  
965 source data 1 and 4) which we uploaded to the Weblogo3 interface  
966 (<http://weblogo.threeplusone.com/>) (Crooks, 2004). The output generated the logos displayed in  
967 Figure 5-figure supplement 2.

968

### 969 **GARD analyses of recombination within *wtf* gene family.**

970 To study the recombination within *wtf* gene family within a species, we first produced an  
971 alignment of the coding sequence of *wtf* genes with Translation align in Geneious Prime®  
972 2021.1.1 (<https://www.geneious.com/>) with MAFFT alignment L-INS-I (200PAM scoring  
973 matrix/k=2; Gap open penalty of 2; offset of 0.123) (Kato, 2002; Kato and Standley, 2013).  
974 We then used our alignments to find recombination events within the *wtf* gene family by using  
975 GARD (Kosakovsky Pond et al., 2006a) with general discrete model of site-to-site variation with  
976 three class rates executed within the Datamonkey website (<https://www.datamonkey.org/>)  
977 (Weaver et al., 2018).

978

### 979 **Syntenic analysis**

980 To find *wtf* loci shared by *Schizosaccharomyces* species (Figure 4 and Figure 4-figure 1) and to  
981 assay the relationship between *wtf* loci and ancestral 5S rDNA sites (Figure 6), we manually  
982 inspected synteny of loci in *S. octosporus*, *S. osmophilus*, *S. cryophilus*, and *S. pombe*. In order  
983 to study the synteny between different *wtf* loci, we used OrthoVenn2 file generated previously  
984 (see *S. osmophilus* genome annotation section of Material and Methods) and the Ensembl fungi  
985 database to identify the orthologous genes (Howe et al., 2019; Xu et al., 2019). For each *wtf* loci  
986 we identified the immediately upstream and downstream gene and then the corresponding  
987 orthologs in each species. If the gene immediately upstream and/or downstream of the *wtf* loci

988 did not correspond to any ortholog, we use the gene after and so on. An analogous approach  
989 was used with the analysis of 5S rDNA sites. All the data is reported in Table S12-S13, S16,  
990 and S17.

991

## 992 ***S. cerevisiae* LExA-ER-AD $\beta$ -estradiol inducible system**

993 The LExA-ER-AD system (Ottoz et al., 2014) uses a heterologous transcription factor containing  
994 LexA DNA-binding protein, the human estrogen receptor (ER) and an activation domain (AD).  $\beta$ -  
995 estradiol binds the human estrogen receptor (ER) and tightly regulates the activity of the LexA-  
996 ER-AD transcription factor. The LexA DNA-binding domain recognizes *lexA* boxes in the target  
997 promoter.

998

## 999 **Cloning *S. octosporus*, *S. osmophilus* and *S. cryophilus* *wtf*<sup>poison</sup> and *wtf*<sup>antidote</sup> alleles for** 1000 **expression in *S. cerevisiae***

1001 All plasmids used in this study are listed in Table S31. All oligos used in this study are listed in  
1002 S30.

1003

1004 Cloning *S. octosporus* *wtf61*<sup>poison</sup> (SOCG\_04114) under the control of a  $\beta$ -estradiol inducible

1005 promoter. We amplified the predicted coding sequence of the *S. octosporus* *wtf61*<sup>poison</sup> from a

1006 gBlock synthesized by IDT (Coralville, IA) via PCR using oligos 1432 and 1442. The *CYC1*

1007 terminator was digested from pSZB395 (Nuckolls et al. 2020) using *SfiI* and *XhoI*. We then

1008 cloned *S. octosporus* *wtf61*<sup>poison</sup> CDS and the *CYC1* terminator into *XhoI* and *BamHI* site of

1009 pSZB385 to generate SZB985. We then digested pSZB985 with *XhoI* and *BamHI* to extract

1010 *wtf61*<sup>poison</sup> CDS with the *CYC1* terminator. We next PCR amplified the LexA promoter (LexApr)

1011 using oligos 1195 and 1240 from FRP1642 (Addgene #58442, Ottoz et al. 2014). We then

1012 cloned both the promoter and the *wtf6*<sup>poison</sup> CDS fragment into pRS316 (Sikorski and Hieter,

1013 1989) digested with *KpnI* and *BamHI* to generate pSZB1040.



1014

1015 Cloning *S. octosporus wtf61<sup>antidote</sup>* (SOCG\_04114) under the control of a  $\beta$ -estradiol inducible  
1016 promoter. We amplified the predicted *S. octosporus wtf61<sup>antidote</sup>* from a gBlock synthesized by  
1017 IDT (Coralville, IA) via PCR using oligos 2011 and 2170. We PCR amplified LexApr using oligos  
1018 1195 and 1240 from FRP1642 (Addgene #58442, *Ottoz et al. 2014*). We PCR amplified CYC1  
1019 terminator from pSZB1040 using oligos 2194 and 2195. We then used overlap PCR to stitch  
1020 together *S. octosporus wtf61<sup>antidote</sup>* and *CYC1* terminator via PCR using oligos 2011 and 2195.  
1021 We digested LexApr with KpnI and XhoI. We digested the fragment *S. octosporus wtf61<sup>antidote</sup>-*  
1022 *CYC1* with XhoI and BamHI. Finally we cloned LexApr and *S. octosporus wtf61<sup>antidote</sup>-CYC1*  
1023 fragments into pRS314 (Sikorski and Hieter, 1989) digested with KpnI and BamHI to generate  
1024 pSZB1108.

1025

1026 Cloning *S. cryophilus wtf1<sup>poison</sup>* (SPOG\_03611) under the control of a  $\beta$ -estradiol inducible  
1027 promoter. We amplified the predicted coding sequence of the *S. cryophilus wtf1<sup>poison</sup>*  
1028 (SPOG\_03611) from a gBlock synthesized by IDT (Coralville, IA) via PCR using oligos 2277 and  
1029 2278. We amplified CYC1 terminator from pSZB1040 using oligos 2279 and 2170. We used  
1030 overlap PCR to stitch together *S. cryophilus wtf1<sup>poison</sup>* with *CYC1* terminator using oligos 2277  
1031 and 2170. We digested that PCR product with XhoI and BamHI. We also amplified the LexApr  
1032 from pSZB1040 using oligos 1195 and 1240 and then digested with KpnI and XhoI. We then  
1033 cloned the *S. cryophilus wtf1<sup>poison</sup>-CYC1* and LexApr cassettes into of pRS316 (Sikorski and  
1034 Hieter, 1989) digested with KpnI and BamHI to generate pSZB1122.

1035

1036 Cloning *S. cryophilus wtf1<sup>antidote</sup>* (SPOG\_03611) under the control of a  $\beta$ -estradiol inducible  
1037 promoter. We amplified the predicted coding sequence of *S. cryophilus wtf1<sup>antidote</sup>* from a gBlock  
1038 synthesized by IDT (Coralville, IA) via PCR using oligos 2276 and 2278. We amplified CYC1  
1039 terminator from pSZB1040 via PCR using oligos 2279 and 2170. We used overlap PCR to stitch



1040 together *S. cryophilus wtf1<sup>antidote</sup>* and *CYC1* terminator using oligos 2276 and 2170. We then  
1041 digested the resulting PCR product with XhoI and BamHI. The LexApr was amplified from  
1042 pSZB1040 via PCR using oligos 1195 and 1240 and then digested with KpnI and XhoI. We then  
1043 cloned both the promoter and *S. cryophilus wtf1<sup>antidote</sup>-CYC1* fragments into pRS314 (Sikorski  
1044 and Hieter, 1989) digested with KpnI and BamHI to generate pSZB1192.

1045

1046 Cloning *S. osmophilus wtf41<sup>poison</sup>* under the control of a  $\beta$ -estradiol inducible promoter. We  
1047 amplified the predicted coding sequence of *S. osmophilus wtf41<sup>poison</sup>* from a gBlock synthesized  
1048 by IDT (Coralville, IA) via PCR using oligos 2783 and 2780. We amplified the *CYC1* terminator  
1049 from pSZB1040 via PCR using oligos 2781 and 2771. We amplified the LexApr from pSZB1040  
1050 via PCR using oligos 1195 and 2778. We used overlap PCR to stitch together LexApr, *S.*  
1051 *osmophilus wtf41<sup>poison</sup>* and the *CYC1* terminator using oligos 1195 and 2771. We then cloned  
1052 the resulting KpnI-digested product into pRS316 (Sikorski and Hieter, 1989) digested with KpnI  
1053 to generate pSZB1327.

1054

1055 Cloning *S. osmophilus wtf41<sup>antidote</sup>* under the control of a  $\beta$ -estradiol inducible promoter. We  
1056 amplified the predicted coding sequence of *S. osmophilus wtf41<sup>antidote</sup>* from a gBlock synthesized  
1057 by IDT (Coralville, IA) via PCR using oligos 2779 and 2780. We amplified the *CYC1* terminator  
1058 from pSZB1040 via PCR using oligos 2781 and 2771. We amplified LexApr from pSZB1040 via  
1059 PCR using oligos 1195 and 2782. We use overlap PCR to stitch together the three fragments  
1060 using oligos 1195 and 2771. We then cloned the KpnI-digested product pRS314 (Sikorski and  
1061 Hieter, 1989) digested with KpnI to generate pSZB1325.

1062

1063 Cloning *S. octosporus wtf25<sup>poison</sup>* (SOCG 04480)-GFP under the control of a  $\beta$ -estradiol  
1064 inducible promoter. We amplified the predicted coding sequence of *S. octosporus wtf25<sup>poison</sup>*  
1065 from a gBlock synthesized by IDT (Coralville, IA) via PCR using oligos 2669 and 2830. We

1066 amplified LexApr from SZB1040 via PCR using oligos 1195 and 2668. We amplified GFP from  
1067 pKT0127 (Sheff and Thorn, 2004) via PCR using oligos 2831 and 2832. We amplified the *CYC1*  
1068 terminator from SZB1040 using oligos 2833 and 2771. We used overlap PCR to stitch together  
1069 LexApr-*S. octosporus wtf25<sup>poison</sup>*-GFP-*CYC1* terminator using oligos 1195 and 2771. We then  
1070 cloned the KpnI-digested product into pRS316 (Sikorski and Hieter, 1989) digested with KpnI  
1071 generate SZB1353.

1072

1073 Cloning *S. octosporus wtf25<sup>antidote</sup>* (SOCG 04480) mCherry under the control of a  $\beta$ -estradiol  
1074 inducible promoter. We amplified the predicted coding sequence of *S. octosporus wtf25<sup>antidote</sup>*  
1075 from a gBlock synthesized by IDT (Coralville, IA) via PCR using oligos 2662 and 2663. We  
1076 amplified LexApr from pSZB1040 via PCR using oligos 1195 and 2661. We amplified mCherry  
1077 from pSZB457 via PCR using oligos 2664 and 2665. We amplified *CYC1* terminator from  
1078 pSZB1040 via PCR using oligos 2666 and 2771. We used overlap PCR to stitch together the  
1079 three products. We then cloned the resulting KpnI-digested PCR product into pRS314 (Sikorski  
1080 and Hieter, 1989) digested with KpnI to generate pSZB1347.

1081

1082 Cloning *S. osmophilus wtf19<sup>poison</sup>* under the control of a  $\beta$ -estradiol inducible promoter. We  
1083 amplified the predicted coding sequence of *S. osmophilus wtf19<sup>poison</sup>* from a gBlock synthesized  
1084 by IDT (Coralville, IA) via PCR using oligos 2777 and 2774. We amplified LexApr from  
1085 pSZB1040 via PCR using oligos 1195 and 2776. We amplified *CYC1* terminator from pSZB1040  
1086 via PCR using oligos 2775 and 2771. We use overlap PCR to stitch together LexApr-*S.*  
1087 *osmophilus wtf19<sup>poison</sup>*-mCherry-*CYC1* terminator using oligos 1195 and 2771. We cloned  
1088 LexApr-*S. osmophilus wtf19<sup>poison</sup>*-*CYC1* terminator into pRS316 (Sikorski and Hieter, 1989)  
1089 digested with KpnI to generate pSZB1324.

1090

1091 Cloning *S. osmophilus wtf19<sup>poison</sup>* under the control of a  $\beta$ -estradiol inducible promoter.

1092 We amplified the predicted coding sequence of *S. osmophilus wtf19<sup>antidote</sup>* from a gBlock  
1093 synthesized by IDT (Coralville, IA) via PCR using oligos 2773 and 2774. We amplified LexApr  
1094 from pSZB1040 via PCR using oligos 1195+2772. We amplified *CYC1* terminator from  
1095 pSZB1040 via PCR using oligos 2775 and 2771. We used overlap PCR to stitch together  
1096 LexApr-*S. osmophilus wtf19<sup>antidote</sup>*-*CYC1* terminator using oligos 1195 and 2771. We cloned  
1097 LexApr-*S. osmophilus wtf19<sup>poison</sup>*- *CYC1* terminator into pRS314 (Sikorski and Hieter, 1989)  
1098 digested with KpnI to generate pSZB1322.

1099

### 1100 **Plasmid transformation in *S. cerevisiae***

1101 All yeast strains used in this study are listed in Table S29 with detailed genotype and citation  
1102 information. Plasmids used in this study are listed in Table S31. We transformed plasmids into  
1103 *S. cerevisiae* SZY1637 (Nuckolls et al., 2020) using a protocol modified from (Elble, 1992).  
1104 Specifically, we incubated a yeast colony in a mix of 240  $\mu$ L 50% PEG3500, 36  $\mu$ L 1 M lithium  
1105 acetate, 50  $\mu$ L boiled salmon sperm DNA (10 mg/ml), and 10  $\mu$ L plasmid for 4-6 hours at 30°C  
1106 before selecting transformants. We selected transformants on Synthetic Complete (SC) media  
1107 (6.7 g/L yeast nitrogen base without amino acids and with ammonium sulfate, 2% agar, 1X  
1108 amino acid mix, 2% glucose) lacking histidine, uracil, and tryptophane (SC -His -Ura -Trp).

1109

### 1110 **Spot assays in *S. cerevisiae***

1111 We grew 5 mL overnight cultures in SC -His -Ura -Trp of each strain. We then diluted each  
1112 culture to an OD<sub>600</sub> of 1 and performed a serial dilution. We then plated 10  $\mu$ L of each dilution on  
1113 a solid SC -His -Ura -Trp petri plate with or without 500 nM  $\beta$ -estradiol.

1114

### 1115 **Imaging Wtf proteins expressed in *S. cerevisiae***

1116 For imaging of Wtf proteins expressed in *S. cerevisiae* (Figure 7D-F), we first grew 5 mL  
1117 saturated overnight cultures in SC -His -Ura -Trp media. The next day, we diluted 1 mL of each

1118 saturated culture into 4 mLs of fresh SC -His -Ura -Trp media. We then added  $\beta$ -estradiol to a  
1119 final concentration of 500 nM to induce *wtf* expression and shook the cultures at 30°C for 4  
1120 hours prior to imaging.

1121

1122 Cells (5  $\mu$ L concentrated culture) were then imaged on an LSM-780 (Zeiss) with a 40x LD C-  
1123 Aplanachromat (NA = 1.1) objective. A physical zoom of 8 was used which yielded an XY pixel size  
1124 of 0.052  $\mu$ m. The fluorescence of GFP was excited with the 488 nm laser and filtered through a  
1125 491-553 nm bandpass filter before being collected onto a GaAsP detector running in photon  
1126 counting mode. The fluorescence of mCherry was excited with the 561 nm laser and filtered  
1127 through a 562-624 nm bandpass filter before being collected onto the same detector.

1128

### 1129 ***S. octosporus* strains**

1130 The two wild-type heterothallic *S. octosporus* strains (DY44286=NIG10005 and  
1131 DY44284=NIG10006) were a kind gift from Dr. Hironori Niki and all other *S. octosporus* strains  
1132 were constructed based on these two heterothallic strains. *S. octosporus*-related genetic  
1133 methods are performed according to or adapted from genetic methods for *S. pombe* (Forsburg  
1134 and Rhind, 2006; Seike and Niki, 2017). The construction of *wtf* gene deletion strains was  
1135 carried out by PCR-based gene targeting using an SV40-EM7 (SVEM) promoter-containing  
1136 G418-resistance marker referred to here as *kanSVEM* (Erler et al., 2006). As sequences  
1137 between the *wtf*-flanking 5S rDNA genes share high similarity among different *wtf* gene loci, to  
1138 ensure the specificity of gene deletion, we used homologous arm sequences outside of 5S  
1139 rDNA genes and the length of at least one homologous arm was above 1 kb. All *wtf* gene  
1140 deletion strains were verified using PCR. PCR primer sequences are listed in Table S30.

1141

1142 To analyze the spore killing activity of *wtf25* at an ectopic genomic locus, we constructed  
1143 integrating plasmids based on the pDB4978 vector described below. A pDB4978-based plasmid

1144 was linearized with NotI digestion and integrated at the *leu1* (SOCG\_02003) locus.  
1145 Transformants were selected by the resistance to clonNAT conferred by the natMX marker on  
1146 pDB4978. Successful integration resulted in the deletion of the ORF sequence of the *leu1*  
1147 (SOCG\_02003) gene and leucine auxotrophic phenotype (Figure 10).

1148

### 1149 **Integration plasmids for *S. octosporus***

1150 All *S. octosporus* plasmids were generated by recombination cloning using the ClonExpressII  
1151 One Step Cloning Kit (Vazyme, Nanjing, China). For the construction of the pDB4978 vector,  
1152 the plasmid pAV0584 (Vještica et al., 2019) was firstly digested using NotI and HindIII, and the  
1153 largest resulting fragment (about 4.5-kb) was purified and then digested using SpeI to obtain an  
1154 approximately 3.7-kb fragment containing AmpR, ori, and the natMX marker. A sequence  
1155 containing the f1ori and multiple cloning sites was PCR amplified from pAV0584 using primers  
1156 oGS-177 and oGS-178 (oligo sequences are listed in Table S30). The sequences upstream and  
1157 downstream of the *leu1*(SOCG\_02003) ORF were amplified from *S. octosporus* genomic DNA  
1158 using primers oGS-192 and oGS-193, and primers oGS-195 and oGS-197, respectively. Finally,  
1159 all four fragments were combined by recombination cloning to generate the pDB4978 vector.

1160

### 1161 **Spore viability analysis**

1162 Spore viability was assessed by octad dissection using a TDM50 tetrad dissection microscope  
1163 (Micro Video Instruments, Avon, USA). The method of octad dissection was adapted from  
1164 (Seike and Niki, 2017) and a detailed description of the experiment procedure follows. First, to  
1165 maximize mating efficiency, before mating, all parental strains were streaked on YES plates for  
1166 overnight growth. Then, parental strains were mixed at a one-to-one ratio and dropped on PMG  
1167 plate (or PMG plates with the leucine supplement for leucine auxotrophic strains) and incubated  
1168 at 30°C. After 2 days, about 1 OD<sub>600</sub> unit of cells were resuspended in 200 µl of 1 mg/ml solution  
1169 of snailase (Beijing Solarbio Science & Technology Co.). The mixture was incubated without

1170 agitation at 25°C for 1 day and then the supernatant was aspirated. Snailase-treated cells were  
1171 diluted in sterile water and then dropped on a YES plate for octad dissection. After dissection,  
1172 plates were incubated at 30°C for about 5 days, and then plates were scanned, and the  
1173 genotypes of colonies were determined by replica plating.

1174

1175 For data analysis, we excluded spores dissected from asci with fewer than 8 spores (asci with  
1176 fewer than 8 spores are rare when sporulation was conducted on PMG plates) and octads  
1177 containing >4 spores harboring one allele of a heterozygous locus (excluded octads represent <  
1178 2% of the octads analyzed). Numeric data of octad dissection analysis are in Figure 8-source  
1179 data 1; Figure 9-supplement 1-6 source data 1 and the scanned plate photos are in the Figure  
1180 8-source data 2; Figure 9-source data 2 ; Figure 9-supplement 1-6 source data 2 and 3. For  
1181 statistical analysis of the spore viability data, Fisher's exact test was performed using the web  
1182 page <https://www.langsrud.com/fisher.htm> and exact binomial test were performed using an  
1183 Excel spreadsheet downloaded from <http://www.biostathandbook.com/exactgof.html> (McDonald,  
1184 2009).

1185

## 1186 **References**

1187 Abbott S, Fairbanks DJ. 2016. Experiments on Plant Hybrids by Gregor Mendel.

1188 doi:10.1534/genetics.116.195198

1189 Abe H, Shimoda C. 2001. Autoregulated expression of *Schizosaccharomyces pombe* meiosis-  
1190 specific transcription factor Mei4 and a genome-wide search for its target genes. *Genetics*.

1191 Akaike H. 1998. Information Theory and an Extension of the Maximum Likelihood Principle.

1192 Springer, New York, NY. pp. 199–213. doi:10.1007/978-1-4612-1694-0\_15

1193 Altschul SF, Gish W, Miller W, Myers EW, Lipman DJ. 1990. Basic local alignment search tool. *J*

1194 *Mol Biol* **215**:403–410. doi:10.1016/S0022-2836(05)80360-2

1195 Altschul SF, Madden TL, Schäffer AA, Zhang J, Zhang Z, Miller W, Lipman DJ. 1997. Gapped

- 1196 BLAST and PSI-BLAST: A new generation of protein database search programs. *Nucleic*  
1197 *Acids Res.* doi:10.1093/nar/25.17.3389
- 1198 Alves-Rodrigues I, Ferreira PG, Moldón A, Vivancos AP, Hidalgo E, Guigó R, Ayté J. 2016.  
1199 Spatiotemporal Control of Forkhead Binding to DNA Regulates the Meiotic Gene  
1200 Expression Program. *Cell Rep* **14**:885–895. doi:10.1016/j.celrep.2015.12.074
- 1201 Anisimova M, Gascuel O. 2006. Approximate Likelihood-Ratio Test for Branches: A Fast,  
1202 Accurate, and Powerful Alternative. *Syst Biol* **55**:539–552.  
1203 doi:10.1080/10635150600755453
- 1204 Bailey TL, Elkan C. 1994. Fitting a mixture model by expectation maximization to discover  
1205 motifs in biopolymers. *Proceedings Int Conf Intell Syst Mol Biol* **2**:28–36.
- 1206 Bailey TL, Johnson J, Grant CE, Noble WS. 2015. The MEME Suite. *Nucleic Acids Res*  
1207 **43**:W39–W49. doi:10.1093/nar/gkv416
- 1208 Bastide H, Cazemajor M, Ogereau D, Derome N, Hospital F, Montchamp-Moreau C. 2011.  
1209 Rapid rise and fall of selfish sex-ratio X chromosomes in drosophila simulans:  
1210 Spatiotemporal analysis of phenotypic and molecular data. *Mol Biol Evol* **28**:2461–2470.  
1211 doi:10.1093/molbev/msr074
- 1212 Bowen NJ, Jordan IK, Epstein JA, Wood V, Levin HL. 2003. Retrotransposons and their  
1213 recognition of pol II promoters: A comprehensive survey of the transposable elements from  
1214 the complete genome sequence of *Schizosaccharomyces pombe*. *Genome Res* **13**:1984–  
1215 1997. doi:10.1101/gr.1191603
- 1216 Bravo Núñez MA, Lange JJ, Zanders SE. 2018a. A suppressor of a wtf poison-antidote meiotic  
1217 driver acts via mimicry of the driver's antidote. *PLOS Genet* **14**:e1007836.  
1218 doi:10.1371/journal.pgen.1007836
- 1219 Bravo Núñez MA, Nuckolls NL, Zanders SE. 2018b. Genetic Villains: Killer Meiotic Drivers.  
1220 *Trends Genet* **34**:424–433. doi:10.1016/j.tig.2018.02.003
- 1221 Bravo Núñez MA, Sabbarini IM, Eickbush MT, Liang Y, Lange JJ, Kent AM, Zanders SE, Nuñez



- 1222 MAB, Sabbarini IM, Eickbush MT, Liang Y, Lange JJ, Kent AM, Zanders SE, Bravo Núñez  
1223 MA, Sabbarini IM, Eickbush MT, Liang Y, Lange JJ, Kent AM, Zanders SE, María Angélica  
1224 Bravo Núñez, Ibrahim M. Sabbarini MTE, Yue Liang, Jeffrey J. Lange, Aubrey M. Kent and  
1225 SEZ, Nuñez MAB, Sabbarini IM, Eickbush MT, Liang Y, Lange JJ, Kent AM, Zanders SE.  
1226 2020a. Dramatically diverse *Schizosaccharomyces pombe* wtf meiotic drivers all display  
1227 high gamete-killing efficiency. *PLoS Genet* **16**:e1008350.  
1228 doi:10.1371/journal.pgen.1008350
- 1229 Bravo Núñez MA, Sabbarini IM, Eide LE, Unckless RL, Zanders SE. 2020b. Atypical meiosis  
1230 can be adaptive in outcrossed *S. pombe* due to wtf meiotic drivers. *Elife*  
1231 **9**:2020.04.28.066035. doi:10.1101/2020.04.28.066035
- 1232 Brysch-Herzberg M, Tobias A, Seidel M, Wittmann R, Wohlmann E, Fischer R, Dlauchy D,  
1233 Peter G. 2019. *Schizosaccharomyces osmophilus* sp. nov., an osmophilic fission yeast  
1234 occurring in bee bread of different solitary bee species. *FEMS Yeast Res.*  
1235 doi:10.1093/femsyr/foz038
- 1236 Burt A, Trivers R. 2006. *Genes in Conflict: The Biology of Selfish Genetic Elements.*
- 1237 Carvalho AB, Vaz SC. 1999. Are *Drosophila* SR drive chromosomes always balanced? *Heredity*  
1238 (*Edinb*) **83**:221–228. doi:10.1038/sj.hdy.6886100
- 1239 Cazemajor M, Landre C, Montchampmoreau C, Landré C, Montchamp-Moreau C. 1997. The  
1240 Sex-Ratio Trait in *Drosophila simulans* : Genetic Analysis of Distortion and Suppression.  
1241 *Genet Soc Am* **147**:635–642.
- 1242 Chen J, Ding J, Ouyang Y, Du H, Yang J, Cheng K, Zhao J, Qiu S, Zhang X, Yao J, Liu K,  
1243 Wang L, Xu C, Li X, Xue Y, Xia M, Ji Q, Lu J, Xu M, Zhang Q. 2008. A triallelic system of  
1244 S5 is a major regulator of the reproductive barrier and compatibility of indica-japonica  
1245 hybrids in rice. *Proc Natl Acad Sci U S A* **105**:11436–11441. doi:10.1073/pnas.0804761105
- 1246 Chiu S-W. 1996. *Patterns in Fungal Development.* Cambridge Univ Press.  
1247 <https://books.google.com/books?hl=fr&lr=&id=CHakwyrnPKIC&oi=fnd&pg=PP13&ots=H4rl>

- 1248 9LBeLJ&sig=EC8FyALrW3oYtGaNURyIG5w5xv4#v=snippet&q=octosporus&f=false
- 1249 Cohen S, Agmon N, Sobol O, Segal D. 2010. Open Access RESEARCH Extrachromosomal  
1250 circles of satellite repeats and 5S ribosomal DNA in human cells, Mobile DNA.  
1251 doi:10.1186/1759-8753-1-11
- 1252 Cohen S, Menut S, Méchali M. 1999. Regulated Formation of Extrachromosomal Circular DNA  
1253 Molecules during Development in *Xenopus laevis*. *Mol Cell Biol* **19**:6682–6689.  
1254 doi:10.1128/mcb.19.10.6682
- 1255 Cohen S, Segal D. 2009. Extrachromosomal circular DNA in eukaryotes: Possible involvement  
1256 in the plasticity of tandem repeats. *Cytogenet Genome Res*. doi:10.1159/000218136
- 1257 Cohen Z, Bacharach E, Lavi S. 2006. Mouse major satellite DNA is prone to eccDNA formation  
1258 via DNA Ligase IV-dependent pathway. *Oncogene* **25**:4515–4524.  
1259 doi:10.1038/sj.onc.1209485
- 1260 Courret C, Chang CH, Wei KHC, Montchamp-Moreau C, Larracunte AM. 2019a. Meiotic drive  
1261 mechanisms: Lessons from *Drosophila*. *Proc R Soc B Biol Sci* **286**:20191430.  
1262 doi:10.1098/rspb.2019.1430
- 1263 Courret C, Gérard PR, Ogereau D, Falque M, Moreau L, Montchamp-Moreau C. 2019b. X-  
1264 chromosome meiotic drive in *Drosophila simulans*: a QTL approach reveals the complex  
1265 polygenic determinism of Paris drive suppression. *Heredity (Edinb)* **122**:906–915.  
1266 doi:10.1038/s41437-018-0163-1
- 1267 Crooks GE. 2004. WebLogo: A Sequence Logo Generator. *Genome Res* **14**:1188–1190.  
1268 doi:10.1101/gr.849004
- 1269 Crow JF. 1991. Why Mendelian Segregation so exact? *BioEssays* **84**:487–492.
- 1270 Daugherty MD, Zanders SE. 2019. Gene conversion generates evolutionary novelty that fuels  
1271 genetic conflicts. *Curr Opin Genet Dev* **58–59**:49–54. doi:10.1016/j.gde.2019.07.011
- 1272 Daulny A, Mejía-Ramírez E, Reina O, Rosado-Lugo J, Aguilar-Arnal L, Auer H, Zaratiegui M,  
1273 Azorin F. 2016. The fission yeast CENP-B protein Abp1 prevents pervasive transcription of

- 1274 repetitive DNA elements. *Biochim Biophys Acta - Gene Regul Mech* **1859**:1314–1321.
- 1275 doi:10.1016/j.bbagr.2016.06.009
- 1276 Dawe RK, Lowry EG, Gent JI, Stitzer MC, Swentowsky KW, Higgins DM, Ross-Ibarra J,
- 1277 Wallace JG, Kanizay LB, Alabady M, Qiu W, Tseng K-F, Wang N, Gao Z, Birchler JA,
- 1278 Harkess AE, Hodges AL, Hiatt EN. 2018. A Kinesin-14 Motor Activates Neocentromeres to
- 1279 Promote Meiotic Drive in Maize. *Cell* **173**:839–850.e18. doi:10.1016/j.cell.2018.03.009
- 1280 Dyer KA, Charlesworth B, Jaenike J. 2007. Chromosome-wide linkage disequilibrium as a
- 1281 consequence of meiotic drive. *Proc Natl Acad Sci* **104**:1587–1592.
- 1282 doi:10.1073/pnas.0605578104
- 1283 Eickbush MT, Young JM, Zanders SE. 2019. Killer Meiotic Drive and Dynamic Evolution of the
- 1284 wtf Gene Family. *Mol Biol Evol* **36**:1–44. doi:10.1101/461004
- 1285 Elble R. 1992. A simple and efficient procedure for transformation of yeasts. *Biotechniques*
- 1286 **13**:18–20.
- 1287 Erler A, Maresca M, Fu J, Stewart AF. 2006. Recombineering reagents for improved inducible
- 1288 expression and selection marker re-use in *Schizosaccharomyces pombe*. *Yeast* **23**:813–
- 1289 823. doi:10.1002/yea.1396
- 1290 Finseth FR, Nelson TC, Fishman L. 2021. Selfish chromosomal drive shapes recent centromeric
- 1291 histone evolution in monkeyflowers. *PLoS Genet* **17**:1–20.
- 1292 doi:10.1371/journal.pgen.1009418
- 1293 Forsburg SL, Rhind N. 2006. Basic methods for fission yeast. *Yeast* **23**:173–183.
- 1294 doi:10.1002/yea.1347
- 1295 Gascuel O. 1997. BIONJ: an improved version of the NJ algorithm based on a simple model of
- 1296 sequence data. *Mol Biol Evol* **14**:685–695. doi:10.1093/oxfordjournals.molbev.a025808
- 1297 Grant CE, Bailey TL, Noble WS. 2011. FIMO: scanning for occurrences of a given motif.
- 1298 *Bioinformatics* **27**:1017–1018. doi:10.1093/bioinformatics/btr064
- 1299 Grognet P, Lalucque H, Malagnac F, Silar P, Heitman J. 2014. Genes That Bias Mendelian

- 1300 Segregation. *PLoS Genet* **10**:e1004387. doi:10.1371/journal.pgen.1004387
- 1301 Guindon S, Dufayard J-FF, Lefort V, Anisimova M, Hordijk W, Gascuel O. 2010. New algorithms  
1302 and methods to estimate maximum-likelihood phylogenies: Assessing the performance of  
1303 PhyML 3.0. *Syst Biol* **59**:307–321. doi:10.1093/sysbio/syq010
- 1304 Haeusler RA, Engelke DR. 2006. Spatial organization of transcription by RNA polymerase III.  
1305 *Nucleic Acids Res* **34**:4826–4836. doi:10.1093/nar/gkl656
- 1306 Hamilton WD. 1967. Extraordinary Sex Ratios. *Science (80- )* **156**:477–488.  
1307 doi:10.1126/science.156.3774.477
- 1308 Hatcher MJ. 2000. Persistence of selfish genetic elements: Population structure and conflict.  
1309 *Trends Ecol Evol*. doi:10.1016/S0169-5347(00)01875-9
- 1310 Helleu Q, Gérard PR, Dubruille R, Ogereau D, Prud'homme B, Loppin B, Montchamp-Moreau  
1311 C. 2016. Rapid evolution of a Y-chromosome heterochromatin protein underlies sex  
1312 chromosome meiotic drive. *Proc Natl Acad Sci* **113**:4110–4115.  
1313 doi:10.1073/pnas.1519332113
- 1314 Herbette M, Wei X, Chang C-HH, Larracuente AM, Loppin B, Dubruille RR. 2021. Distinct  
1315 spermiogenic phenotypes underlie sperm elimination in the Segregation Distorter meiotic  
1316 drive system, PLoS Genetics. doi:10.1371/journal.pgen.1009662
- 1317 Hoff KJ, Stanke M. 2018. Predicting Genes in Single Genomes with AUGUSTUS. *Curr Protoc*  
1318 *Bioinforma* e57. doi:10.1002/cpbi.57
- 1319 Howe KL, Contreras-Moreira B, De Silva N, Maslen G, Akanni W, Allen J, Alvarez-Jarreta J,  
1320 Barba M, Bolser DM, Cambell L, Carbajo M, Chakiachvili M, Christensen M, Cummins C,  
1321 Cuzick A, Davis P, Fexova S, Gall A, George N, Gil L, Gupta P, Hammond-Kosack KE,  
1322 Haskell E, Hunt SE, Jaiswal P, Janacek SH, Kersey PJ, Langridge N, Maheswari U, Maurel  
1323 T, Mcdowall MD, Moore B, Muffato M, Naamati G, Naithani S, Olson A, Papatheodorou I,  
1324 Patricio M, Paulini M, Pedro H, Perry E, Preece J, Rosello M, Russell M, Sitnik V, Staines  
1325 DM, Stein J, Tello-Ruiz MK, Trevanion SJ, Urban M, Wei S, Ware D, Williams G, Yates

- 1326 AD, Flicek P. 2019. Ensembl Genomes 2020-enabling non-vertebrate genomic research.  
1327 *Nucleic Acids Res* **48**:689–695. doi:10.1093/nar/gkz890
- 1328 Hu W, Jiang Z-D Di, Suo F, Zheng J-XX, He W-ZZ, Du L-LL. 2017. A large gene family in fission  
1329 yeast encodes spore killers that subvert Mendel's law. *Elife* **6**:1–3. doi:10.7554/elife.26057
- 1330 Huang X, Zhao Q, Han B. 2015. Comparative population genomics reveals strong divergence  
1331 and infrequent introgression between Asian and African rice. *Mol Plant*.  
1332 doi:10.1016/j.molp.2015.01.010
- 1333 Jeffares DC, Jolly C, Hoti M, Speed D, Shaw L, Rallis C, Balloux F, Dessimoz C, Bähler J,  
1334 Sedlazeck FJ. 2017. Transient structural variations have strong effects on quantitative  
1335 traits and reproductive isolation in fission yeast. *Nat Commun* **8**.  
1336 doi:10.1038/ncomms14061
- 1337 Johansen P, Cam HP. 2015. Suppression of meiotic recombination by CENP-B homologs in  
1338 *Schizosaccharomyces pombe*. *Genetics* **201**:897–904. doi:10.1534/genetics.115.179465
- 1339 Joseph Felsenstein. 2004. Inferring Phylogenies. *Sinauer Assoc , Sanderland, Massachusetts*.
- 1340 Kanizay LB, Pyhäjärvi T, Lowry EG, Hufford MB, Peterson DG, Ross-Ibarra J, Dawe RK. 2013.  
1341 Diversity and abundance of the abnormal chromosome 10 meiotic drive complex in *Zea*  
1342 *mays*. *Heredity (Edinb)* **110**:570–577. doi:10.1038/hdy.2013.2
- 1343 Katoh K. 2002. MAFFT: a novel method for rapid multiple sequence alignment based on fast  
1344 Fourier transform. *Nucleic Acids Res* **30**:3059–3066. doi:10.1093/nar/gkf436
- 1345 Katoh K, Standley DM. 2013. MAFFT multiple sequence alignment software version 7:  
1346 Improvements in performance and usability. *Mol Biol Evol* **30**:772–780.  
1347 doi:10.1093/molbev/mst010
- 1348 Koide Y, Ogino A, Yoshikawa T, Kitashima Y, Saito N, Kanaoka Y, Onishi K, Yoshitake Y,  
1349 Tsukiyama T, Saito H, Teraishi M, Yamagata Y, Uemura A, Takagi H, Hayashi Y, Abe T,  
1350 Fukuta Y, Okumoto Y, Kanazawa A. 2018. Lineage-specific gene acquisition or loss is  
1351 involved in interspecific hybrid sterility in rice. *Proc Natl Acad Sci* **115**:E1955–E1962.

- 1352 doi:10.1073/pnas.1711656115
- 1353 Kosakovsky Pond SL, Posada D, Gravenor MB, Woelk CH, Frost SDW. 2006a. Automated  
1354 Phylogenetic Detection of Recombination Using a Genetic Algorithm. *Mol Biol Evol*  
1355 **23**:1891–1901. doi:10.1093/molbev/msl051
- 1356 Kosakovsky Pond SL, Posada D, Gravenor MB, Woelk CH, Frost SDWW, Kosakovsky SL,  
1357 Posada D, Gravenor MB, Woelk CH, Frost SDWW. 2006b. GARD: a genetic algorithm for  
1358 recombination detection. *Bioinformatics* **22**:3096–3098. doi:10.1093/bioinformatics/btl474
- 1359 Kumon T, Ma J, Akins RB, Stefanik D, Nordgren CE, Kim J, Levine MT, Lampson MA. 2021.  
1360 Parallel pathways for recruiting effector proteins determine centromere drive and  
1361 suppression. *Cell* **184**:4904-4918.e11. doi:10.1016/j.cell.2021.07.037
- 1362 Larracuenta AM, Presgraves DC. 2012. The Selfish Segregation Distorter Gene Complex of  
1363 *Drosophila melanogaster*. *Genetics* **192**:33–53. doi:10.1534/genetics.112.141390
- 1364 Lefort V, Longueville J-EE, Gascuel O. 2017. SMS: Smart Model Selection in PhyML **34**:2422–  
1365 2424. doi:10.1093/molbev/msx149
- 1366 Lin CJ, Hu F, Dubruille R, Vedanayagam J, Wen J, Smibert P, Loppin B, Lai EC. 2018. The  
1367 hpRNA/RNAi Pathway Is Essential to Resolve Intragenomic Conflict in the *Drosophila* Male  
1368 Germline. *Dev Cell* **46**:316-326.e5. doi:10.1016/j.devcel.2018.07.004
- 1369 Lindholm AK, Dyer KA, Firman RC, Fishman L, Forstmeier W, Holman L, Johannesson H, Knief  
1370 U, Kokko H, Larracuenta AM, Manser A, Montchamp-Moreau C, Petrosyan VG,  
1371 Pomiankowski A, Presgraves DC, Safronova LD, Sutter A, Unckless RL, Verspoor RL,  
1372 Wedell N, Wilkinson GS, Price TAR, Anna K. Lindholm, 1,\* Kelly A. Dyer, 2 Renée C.  
1373 Firman, 3 Lila Fishman, 4 Wolfgang Forstmeier, 5 Luke Holman, 6 Hanna Johannesson, 7  
1374 Ulrich Knief, 5 Hanna Kokko, 1 Amanda M. Larracuenta, 8 Andri Manser, 1 Catherine  
1375 Montchamp-Moreau, 9 Varos G. Petrosyan, 15 and Tom A.R. Price<sup>13</sup>, Lindholm AK, Dyer  
1376 KA, Firman RC, Fishman L, Forstmeier W, Holman L, Johannesson H, Knief U, Kokko H,  
1377 Larracuenta AM, Manser A, Montchamp-Moreau C, Petrosyan VG, Pomiankowski A,

- 1378 Presgraves DC, Safronova LD, Sutter A, Unckless RL, Verspoor RL, Wedell N, Wilkinson  
1379 GS, Price TAR. 2016. The Ecology and Evolutionary Dynamics of Meiotic Drive. *Trends*  
1380 *Ecol Evol* **31**:315–326. doi:10.1016/j.tree.2016.02.001
- 1381 Long Y, Zhao L, Niu B, Su J, Wu HH, Chen Y, Zhang Q, Guo J, Zhuang C, Mei M, Xia J, Wang  
1382 L, Wu HH, Liu Y-GG. 2008. Hybrid male sterility in rice controlled by interaction between  
1383 divergent alleles of two adjacent genes. *Proc Natl Acad Sci U S A* **105**:18871–18876.  
1384 doi:10.1073/pnas.0810108105
- 1385 Lyon MF. 2003. Transmission Ratio Distortion in Mice. *Annu Rev Genet* **37**:393–408.  
1386 doi:10.1146/annurev.genet.37.110801.143030
- 1387 Mata J, Wilbrey A, Bähler J. 2007. Transcriptional regulatory network for sexual differentiation in  
1388 fission yeast. *Genome Biol* **8**:R217. doi:10.1186/gb-2007-8-10-r217
- 1389 McDonald JH. 2009. Handbook of Biological Statistics. *Sparky House Publ Balt MD Vol 2*:180–  
1390 185.
- 1391 McLaughlin RN, Malik HS. 2017. Genetic conflicts: The usual suspects and beyond. *J Exp Biol*  
1392 **220**:6–17. doi:10.1242/jeb.148148
- 1393 Meiklejohn CD, Landeen EL, Gordon KE, Rzatkiwicz T, Kingan SB, Geneva AJ, Vedanayagam  
1394 JP, Muirhead CA, Garrigan D, Stern DL, Presgraves DC. 2018. Gene flow mediates the  
1395 role of sex chromosome meiotic drive during complex speciation. *Elife* **7**:024711.  
1396 doi:10.7554/eLife.35468
- 1397 Mizuguchi T, Taneja N, Matsuda E, Belton J-M, FitzGerald P, Dekker J, Grewal SIS. 2017.  
1398 Shelterin components mediate genome reorganization in response to replication stress.  
1399 *Proc Natl Acad Sci* **114**:5479–5484. doi:10.1073/pnas.1705527114
- 1400 Muirhead CA, Presgraves DC. 2021. Satellite DNA-mediated diversification of a sex-ratio  
1401 meiotic drive gene family in *Drosophila*. *Nat Ecol Evol* 1–9. doi:10.1038/s41559-021-  
1402 01543-8
- 1403 Navrátilová A, Koblížková A, Macas J. 2008. Survey of extrachromosomal circular DNA derived



- 1404 from plant satellite repeats. *BMC Plant Biol* **8**:90. doi:10.1186/1471-2229-8-90
- 1405 Nuckolls NL, Mok AC, Lange JJ, Yi K, Kandola TS, Hunn AM, McCroskey S, Snyder JL, Bravo  
1406 Núñez MA, McClain M, McKinney SA, Wood C, Halfmann R, Zanders SE. 2020. The wtf4  
1407 meiotic driver utilizes controlled protein aggregation to generate selective cell death. *Elife*  
1408 **9**:2020.02.05.935874. doi:10.7554/eLife.55694
- 1409 Nuckolls NL, Núñez MAB, Eickbush MT, Young JM, Lange JJ, Yu JS, Smith GR, Jaspersen SL,  
1410 Malik HS, Zanders SE. 2017. Wtf Genes Are Prolific Dual Poison-Antidote Meiotic Drivers.  
1411 *Elife* **6**:1–43. doi:10.7554/eLife.26033
- 1412 Nuckolls NL, Srinivasa AN, Mok AC, Bravo Núñez MA, Lange JJ, Gallagher TJ, Seidel CW,  
1413 Zanders SE. 2021. S. pombe wtf genes use dual transcriptional regulation and selective  
1414 protein exclusion from spores to cause meiotic drive. *bioRxiv* 2021.09.30.462505.  
1415 doi:10.1101/2021.09.30.462505
- 1416 Ottoz DSM, Rudolf F, Stelling J. 2014. Inducible, tightly regulated and growth condition-  
1417 independent transcription factor in *Saccharomyces cerevisiae*. *Nucleic Acids Res* **42**:130.  
1418 doi:10.1093/nar/gku616
- 1419 Ou S, Jiang N. 2018. LTR\_retriever: A Highly Accurate and Sensitive Program for Identification  
1420 of Long Terminal Repeat Retrotransposons. *Plant Physiol* **176**:1410–1422.  
1421 doi:10.1104/pp.17.01310
- 1422 Paulsen T, Kumar P, Koseoglu MM, Dutta A. 2018. Discoveries of Extrachromosomal Circles of  
1423 DNA in Normal and Tumor Cells. *Trends Genet.* doi:10.1016/j.tig.2017.12.010
- 1424 Price TARR, Verspoor R, Wedell N. 2019. Ancient gene drives: an evolutionary paradox. *Proc R*  
1425 *Soc B Biol Sci* **286**:20192267. doi:10.1098/rspb.2019.2267
- 1426 Rhind N, Chen Z, Yassour M, Thompson DA, Haas BJ, Habib N, Wapinski I, Roy S, Lin MF,  
1427 Heiman DI, Young SK, Furuya K, Guo Y, Pidoux A, Chen HM, Robbertse B, Goldberg JM,  
1428 Aoki K, Bayne EH, Berlin AM, Desjardins CA, Dobbs E, Dukaj L, Fan L, FitzGerald MG,  
1429 French C, Gujja S, Hansen K, Keifenheim D, Levin JZ, Mosher RA, Muller CA, Pfiffner J,

- 1430 Priest M, Russ C, Smialowska A, Swoboda P, Sykes SM, Vaughn M, Vengrova S, Yoder  
1431 R, Zeng Q, Allshire R, Baulcombe D, Birren BW, Brown W, Ekwall K, Kellis M,  
1432 Leatherwood J, Levin H, Margalit H, Martienssen R, Nieduszynski CA, Spatafora JW,  
1433 Friedman N, Dalgaard JZ, Baumann P, Niki H, Regev A, Nusbaum C, Müller CA, Pfiffner J,  
1434 Priest M, Russ C, Smialowska A, Swoboda P, Sykes SM, Vaughn M, Vengrova S, Yoder  
1435 R, Zeng Q, Allshire R, Baulcombe D, Birren BW, Brown W, Ekwall K, Kellis M,  
1436 Leatherwood J, Levin H, Margalit H, Martienssen R, Nieduszynski CA, Spatafora JW,  
1437 Friedman N, Dalgaard JZ, Baumann P, Niki H, Regev A, Nusbaum C, Muller CA, Pfiffner J,  
1438 Priest M, Russ C, Smialowska A, Swoboda P, Sykes SM, Vaughn M, Vengrova S, Yoder  
1439 R, Zeng Q, Allshire R, Baulcombe D, Birren BW, Brown W, Ekwall K, Kellis M,  
1440 Leatherwood J, Levin H, Margalit H, Martienssen R, Nieduszynski CA, Spatafora JW,  
1441 Friedman N, Dalgaard JZ, Baumann P, Niki H, Regev A, Nusbaum C, Müller CA, Pfiffner J,  
1442 Priest M, Russ C, Smialowska A, Swoboda P, Sykes SM, Vaughn M, Vengrova S, Yoder  
1443 R, Zeng Q, Allshire R, Baulcombe D, Birren BW, Brown W, Ekwall K, Kellis M,  
1444 Leatherwood J, Levin H, Margalit H, Martienssen R, Nieduszynski CA, Spatafora JW,  
1445 Friedman N, Dalgaard JZ, Baumann P, Niki H, Regev A, Nusbaum C. 2011. Comparative  
1446 functional genomics of the fission yeasts. *Science (80- )* **332**:930–936.  
1447 doi:10.1126/science.1203357  
1448 Robinson JT, Thorvaldsdóttir H, Winckler W, Guttman M, Lander ES, Getz G, Mesirov JP. 2011.  
1449 Integrative genomics viewer. *Nat Biotechnol* **29**:24–26. doi:10.1038/nbt.1754  
1450 Ross-Ibarra J, Tenailon M, Gaut BS. 2009. Historical divergence and gene flow in the genus  
1451 *Zea*. *Genetics* **181**:1399–1413. doi:10.1534/genetics.108.097238  
1452 Sakata M, Takano-Kai N, Miyazaki Y, Kanamori H, Wu J, Matsumoto T, Doi K, Yasui H,  
1453 Yoshimura A, Yamagata Y. 2021. Domain Unknown Function DUF1668-Containing Genes  
1454 in Multiple Lineages Are Responsible for F1 Pollen Sterility in Rice. *Front Plant Sci*  
1455 **11**:2314. doi:10.3389/fpls.2020.632420

- 1456 Sandler L, Novitski E. 1957. Meiotic Drive as an Evolutionary Force. *Am Nat* **91**:105–110.  
1457 doi:10.1086/281969
- 1458 Seike T, Nakamura T, Shimoda C. 2015. Molecular coevolution of a sex pheromone and its  
1459 receptor triggers reproductive isolation in *Schizosaccharomyces pombe*. *Proc Natl Acad*  
1460 *Sci* **112**:4405–4410. doi:10.1073/pnas.1501661112
- 1461 Seike T, Niki H. 2017. Mating response and construction of heterothallic strains of the fission  
1462 yeast *Schizosaccharomyces octosporus*. *FEMS Yeast Res* **17**:1–14.  
1463 doi:10.1093/femsyr/fox045
- 1464 Seike T, Shimoda C, Niki H. 2019. Asymmetric diversification of mating pheromones in fission  
1465 yeast. *PLOS Biol* **17**:e3000101. doi:10.1371/journal.pbio.3000101
- 1466 Sheff MA, Thorn KS. 2004. Optimized cassettes for fluorescent protein tagging  
1467 in *Saccharomyces cerevisiae*. *Yeast* **21**:661–670. doi:10.1002/yea.1130
- 1468 Shen R, Wang L, Liu X, Wu J, Jin W, Zhao X, Xie X, Zhu Q, Tang H, Li Q, Chen L, Liu Y-G.  
1469 2017. Genomic structural variation-mediated allelic suppression causes hybrid male  
1470 sterility in rice. *Nat Commun* **8**:1310. doi:10.1038/s41467-017-01400-y
- 1471 Sikorski RS, Hieter P. 1989. A system of shuttle vectors and yeast host strains designed for  
1472 efficient manipulation of DNA in *Saccharomyces cerevisiae*. *Genetics* **122**:19–27.
- 1473 Simão FA, Waterhouse RM, Ioannidis P, Kriventseva E V., Zdobnov EM. 2015. BUSCO:  
1474 Assessing genome assembly and annotation completeness with single-copy orthologs.  
1475 *Bioinformatics* **31**:3210–3212. doi:10.1093/bioinformatics/btv351
- 1476 Sipiczki M. 1979. Interspecific protoplast fusion in fission yeasts. *Curr Microbiol* **3**:37–40.  
1477 doi:10.1007/BF02603131
- 1478 Sipiczki M, Kucsera J, Ulaszewski S, Zsolt J. 1982. Hybridization Studies by Crossing and  
1479 Protoplast Fusion within the Genus *Schizosaccharomyces* Lindner. *Microbiology*  
1480 **128**:1989–2000. doi:10.1099/00221287-128-9-1989
- 1481 Sproul JS, Khost DE, Eickbush DG, Negm S, Wei X, Wong I, Larracuente AM. 2020. Dynamic

- 1482 Evolution of Euchromatic Satellites on the X Chromosome in *Drosophila melanogaster* and  
1483 the simulans Clade. *Mol Biol Evol* **37**:2241–2256. doi:10.1093/molbev/msaa078
- 1484 Stanke M, Diekhans M, Baertsch R, Haussler D. 2008. Using native and syntenically mapped  
1485 cDNA alignments to improve de novo gene finding. *Bioinformatics* **24**:637–644.  
1486 doi:10.1093/bioinformatics/btn013
- 1487 Stanke M, Schöffmann O, Morgenstern B, Waack S. 2006. Gene prediction in eukaryotes with a  
1488 generalized hidden Markov model that uses hints from external sources. *BMC*  
1489 *Bioinformatics* **7**. doi:10.1186/1471-2105-7-62
- 1490 Tamura K. 2003. Temporal Patterns of Fruit Fly (*Drosophila*) Evolution Revealed by Mutation  
1491 Clocks. *Mol Biol Evol* **21**:36–44. doi:10.1093/molbev/msg236
- 1492 Tang AD, Soulette CM, van Baren MJ, Hart K, Hrabeta-Robinson E, Wu CJ, Brooks AN. 2020.  
1493 Full-length transcript characterization of SF3B1 mutation in chronic lymphocytic leukemia  
1494 reveals downregulation of retained introns. *Nat Commun* **11**:1438. doi:10.1038/s41467-  
1495 020-15171-6
- 1496 Tao Y, Masly JP, Araripe L, Ke Y, Hartl DL. 2007. A sex-ratio meiotic drive system in *Drosophila*  
1497 simulans. I: An autosomal suppressor. *PLoS Biol* **5**:2560–2575.  
1498 doi:10.1371/journal.pbio.0050292
- 1499 Tong P, Pidoux AL, Toda NRTT, Ard R, Berger H, Shukla M, Torres-Garcia J, Mueller CA,  
1500 Nieduszynski CA, Allshire RC, Müller CA, Nieduszynski CA, Allshire RC. 2019.  
1501 Interspecies conservation of organisation and function between nonhomologous regional  
1502 centromeres. *Nat Commun* **10**. doi:10.1038/s41467-019-09824-4
- 1503 Unckless RL, Larracuente AM, Clark AG. 2015. Sex-Ratio Meiotic Drive and Y-Linked  
1504 Resistance in *Drosophila affinis*. *Genetics* **199**:831–840. doi:10.1534/genetics.114.173948
- 1505 Vedanayagam J, Lin C-J, Lai EC. 2021. Rapid evolutionary dynamics of an expanding family of  
1506 meiotic drive factors and their hpRNA suppressors. *Nat Ecol Evol* **5**:1613–1623.  
1507 doi:10.1038/s41559-021-01592-z

- 1508 Vještica A, Marek M, Nkosi PJ, Merlini L, Liu G, Bérard M, Billault-Chaumartin I, Martin SG.  
1509 2019. A toolbox of Stable Integration Vectors (SIV) in the fission yeast  
1510 *Schizosaccharomyces pombe*. *J Cell Sci*. doi:10.1242/jcs.240754
- 1511 Vogan AA, Ament-Velásquez SL, Bastiaans E, Wallerman O, Saupe SJ, Suh A, Johannesson  
1512 H. 2021. The Enterprise , a massive transposon carrying Spok meiotic drive genes.  
1513 *Genome Res* **31**:789–798. doi:10.1101/gr.267609.120
- 1514 Weaver S, Shank SD, Spielman SJ, Li M, Muse S V, Kosakovsky Pond SL. 2018. Datamonkey  
1515 2.0: A modern web application for characterizing selective and other evolutionary  
1516 processes. *Mol Biol Evol* **35**:773–777. doi:10.1093/molbev/msx335
- 1517 Wei KHC, Reddy HM, Rathnam C, Lee J, Lin D, Ji S, Mason JM, Clark AG, Barbash DA. 2017.  
1518 A pooled sequencing approach identifies a candidate meiotic driver in *Drosophila*. *Genetics*  
1519 **206**:451–465. doi:10.1534/genetics.116.197335
- 1520 Wood V, Gwilliam R, Rajandream M-A, Lyne M, Lyne R, Stewart A, Sgouros J, Peat N, Hayles  
1521 J, Baker S, Basham D, Bowman S, Brooks K, Brown D, Brown S, Chillingworth T,  
1522 Churcher C, Collins M, Connor R, Cronin A, Davis P, Feltwell T, Fraser A, Gentles S,  
1523 Goble A, Hamlin N, Harris D, Hidalgo J, Hodgson G, Holroyd S, Hornsby T, Howarth S,  
1524 Huckle EJ, Hunt S, Jagels K, James K, Jones L, Jones M, Leather S, McDonald S, McLean  
1525 J, Mooney P, Moule S, Mungall K, Murphy L, Niblett D, Odell C, Oliver K, O’Neil S,  
1526 Pearson D, Quail MA, Rabinowitsch E, Rutherford K, Rutter S, Saunders D, Seeger K,  
1527 Sharp S, Skelton J, Simmonds M, Squares R, Squares S, Stevens K, Taylor K, Taylor RG,  
1528 Tivey A, Walsh S, Warren T, Whitehead S, Woodward J, Volckaert G, Aert R, Robben J,  
1529 Grymonprez B, Weltjens I, Vanstreels E, Rieger M, Schäfer M, Müller-Auer S, Gabel C,  
1530 Fuchs M, Fritzc C, Holzer E, Moestl D, Hilbert H, Borzym K, Langer I, Beck A, Lehrach H,  
1531 Reinhardt R, Pohl TM, Eger P, Zimmermann W, Wedler H, Wambutt R, Purnelle B,  
1532 Goffeau A, Cadieu E, Dréano S, Gloux S, Lelaure V, Mottier S, Galibert F, Aves SJ, Xiang  
1533 Z, Hunt C, Moore K, Hurst SM, Lucas M, Rochet M, Gaillardin C, Tallada VA, Garzon A,

- 1534 Thode G, Daga RR, Cruzado L, Jimenez J, Sánchez M, del Rey F, Benito J, Domínguez A,  
1535 Revuelta JL, Moreno S, Armstrong J, Forsburg SL, Cerrutti L, Lowe T, McCombie WR,  
1536 Paulsen I, Potashkin J, Shpakovski G V., Ussery D, Barrell BG, Nurse P. 2002. The  
1537 genome sequence of *Schizosaccharomyces pombe*. *Nature* **415**:871–880.  
1538 doi:10.1038/nature724
- 1539 Xie Y, Tang J, Xie X, Li X, Huang J, Fei Y, Han J, Chen S, Tang H, Zhao X, Tao D, Xu P, Liu  
1540 YG, Chen L. 2019. An asymmetric allelic interaction drives allele transmission bias in  
1541 interspecific rice hybrids. *Nat Commun* **10**:1–10. doi:10.1038/s41467-019-10488-3
- 1542 Xie Y, Xu P, Huang J, Ma S, Xie X, Tao D, Chen L, Liu Y-G. 2017. Interspecific Hybrid Sterility  
1543 in Rice Is Mediated by OgTPR1 at the S1 Locus Encoding a Peptidase-like Protein. *Mol*  
1544 *Plant* **10**:1137–1140. doi:10.1016/j.molp.2017.05.005
- 1545 Xu L, Dong Z, Fang L, Luo Y, Wei Z, Guo H, Zhang G, Gu YQ, Coleman-Derr D, Xia Q, Wang  
1546 Y. 2019. OrthoVenn2: a web server for whole-genome comparison and annotation of  
1547 orthologous clusters across multiple species. *Nucleic Acids Res* **47**:W52–W58.  
1548 doi:10.1093/nar/gkz333
- 1549 Yang J, Zhao X, Cheng K, Du H, Ouyang Y, Chen J, Qiu S, Huang J, Jiang Y, Jiang L, Ding J,  
1550 Wang J, Xu C, Li X, Zhang Q. 2012. A Killer-Protector System Regulates Both Hybrid  
1551 Sterility and Segregation Distortion in Rice. *Science (80- )* **337**:1336–1340.  
1552 doi:10.1126/science.1223702
- 1553 Yu Y, Zhao Z, Shi Y, Tian H, Liu L, Bian X, Xu Y, Zheng X, Gan L, Shen Y, Wang Chaolong, Yu  
1554 X, Wang Chunming, Zhang X, Guo X, Wang J, Ikehashi H, Jiang L, Wan J. 2016. Hybrid  
1555 sterility in rice (*Oryza sativa* L.) involves the tetratricopeptide repeat domain containing  
1556 protein. *Genetics* **203**:1439–1451. doi:10.1534/GENETICS.115.183848/-/DC1
- 1557 Zanders S, Johannesson H. 2021. Molecular Mechanisms and Evolutionary Consequences of  
1558 Spore Killers in Ascomycetes. *Microbiol Mol Biol Rev*. doi:10.1128/membr.00016-21
- 1559 Zanders SE, Unckless RL. 2019. Fertility Costs of Meiotic Drivers. *Curr Biol*.

1560 doi:10.1016/j.cub.2019.03.046

1561 Zimmering S, Sandler L, Nicoletti B. 1970. Mechanisms of Meiotic Drive. *Annu Rev Genet*

1562 4:409–436. doi:10.1146/annurev.ge.04.120170.002205

1563

1564

## 1565 **Figure legends**

### 1566 **Figure 1: *wtf* homologs are found outside of *S. pombe*.**

1567 **(A)** Model for meiotic drive of *wtf* genes in *S. pombe*, modified from (Nuckolls et al., 2017). All  
1568 spores are exposed to the poison protein, but those that inherit the *wtf* driver are rescued by the  
1569 antidote protein. **(B)** Phylogeny of *Schizosaccharomyces* species including the numbers of *wtf*  
1570 homologs found by PSI-BLAST and BLASTn searches. MYA represents million years ago. \*The  
1571 *S. osmophilus* genome is not fully assembled, so the number represents the *wtf* homologs  
1572 found within the assembled contigs. The phylogeny is based on published reports (Brysch-  
1573 Herzberg et al., 2019; Rhind et al., 2011) and our own analyses with the added partial assembly  
1574 of *S. osmophilus*. Annotations of all the identified genes can be found in Figure 1-source data 2.

1575

### 1576 **Figure 1-source data 1: *S. osmophilus* genome assembly.**

1577 Fasta file containing the partial genome assembly of *S. osmophilus* from this study.

1578

### 1579 **Figure 1-source data 2: Predicted *S. osmophilus* gene annotations.**

1580 We used the Augustus program (Stanke et al., 2006) to predict *S. osmophilus* gene annotations  
1581 using a model based on *S. octosporus* genes. Augustus generated a GTF file with all the  
1582 predicted genes.

1583

### 1584 **Figure 1-source data 3: Orthologous genes in *Schizosaccharomyces*.**



1585 A list of orthologous gene sets within *Schizosaccharomyces* generated by Orthovenn 2 (Xu et  
1586 al., 2019) and each comparison between orthologs was assessed by BLAST (Altschul et al.,  
1587 1990). The columns display in order query species, query gene, subject species, subject gene,  
1588 percentage of identity and length of the query.

1589

1590 **Figure 1-source data 4: *S. octosporus* genome annotation.**

1591 GFF file of *S. octosporus* genome.

1592

1593 **Figure 1-source data 5: *S. osmophilus* genome annotation.**

1594 GFF file of *S. osmophilus* genome.

1595

1596 **Figure 1-source data 6: *S. cryophilus* genome annotation.**

1597 GFF file of *S. cryophilus* genome.

1598

1599 **Figure 1-figure supplement 1: Maps of the *wtf* gene family members in *S. octosporus*, *S.*  
1600 *osmophilus*, *S. cryophilus*, and *S. pombe*.**

1601 Genome maps of *wtf* genes from (A) *S. octosporus*, (B) *S. osmophilus*, (C) *S. cryophilus*, and  
1602 (D) *S. pombe*. Genes on the forward strand are shown above each chromosome, whereas  
1603 genes on the reverse strand are shown below chromosomes. Genes that we predict to be intact  
1604 drivers because they contain an alternate translational start site near the beginning of exon 2  
1605 are shown in purple. Genes that we predict to be drive suppressors because they lack the  
1606 potential alternate start site are shown in green. Predicted pseudogenes are indicated with an  
1607 asterisk\*. The four *S. pombe wtf* genes with unknown functions are shown in light blue. The *S.*  
1608 *pombe* map is modified from (Eickbush et al., 2019). Annotations of the novel *wtf* genes can be  
1609 found in Tables S2-S4.

1610

1611 **Figure 2: *S. pombe wtf* genes share features with other *wtf* genes outside of *S. pombe*.**

1612 **(A)** Schematic *wtf* loci of the *Schizosaccharomyces* species. Orange boxes correspond to exons  
1613 (E1 indicates exon 1, etc.), the red boxes represent 5S rDNA genes, the blue box represents  
1614 a pseudogenized *wag* gene and the yellow box is an LTR from a Tf transposon. The predicted  
1615 translational start sites for the antidote (ATG in exon 1) and poison (ATG in exon 2) proteins are  
1616 indicated, as is the FLEX transcriptional regulatory motif (Table S2-S4). **(B)** Long-read RNA  
1617 sequencing of mRNAs from meiotic *S. octosporus* cells revealed two main transcript isoforms of  
1618 the *wtf25* gene, presumably encoding an antidote and a poison protein, respectively. cDNA  
1619 reads obtained using the Oxford Nanopore Technologies (ONT) platform are shown in pink.  
1620 Blue lines indicate sequences missing in the reads due to splicing. The diagram at the top  
1621 depicts the two main transcript isoforms. The 3' transcript ends shown in the diagram  
1622 correspond to the major transcript end revealed by cDNA reads.

1623

1624 **Figure 2-source data 1: *S. octosporus* RNA-seq data.**

1625 Long-read RNA sequence data (Oxford Nanopore) are available at the NCBI SRA under the  
1626 accession number SRR17543072. Standard RNA sequence data (Illumina) are available at the  
1627 NCBI SRA under the accession number SRR17543073.

1628

1629 **Figure 2-figure supplement 1: Limited conservation of Wtf proteins.**

1630 The percent identity shared amongst all 113 Wtf predicted antidote proteins from *S.*  
1631 *octosporus*, *S. osmophilus*, *S. cryophilus* and *S. pombe* (isolate FY29033) aligned with MAFFT  
1632 (L-INS-I; BLOSSUM62 scoring matrix/k=2; Gap open penalty of 2; offset of 0.123) (Katoh, 2002;  
1633 Katoh and Standley, 2013). The data are shown in 10 amino acid sliding windows. The  
1634 alignment can be found in Figure 2-figure supplement 1-source data 1.

1635

1636 **Figure 2-figure supplement 1-source data 1: Multi-alignment of all 113 Wtf predicted**  
1637 **antidote proteins of *S. octosporus*, *S. osmophilus*, *S. cryophilus*, and *S. pombe*.**

1638 Alignment of 113 predicted antidotes Wtf proteins made using MAFFT (Kato, 2002; Kato and  
1639 Standley, 2013). This alignment was used to generate Figure 2-figure supplement 1.

1640

1641 **Figure 2-figure supplement 2: Many *wtf* genes in *S. octosporus* harbor the FLEX motif in**  
1642 **intron 1.**

1643 **(A)** The FLEX motif identified by the *de novo* motif discovery tool MEME. 49 Mei4 target genes  
1644 in *S. pombe* and their orthologs in *S. octosporus*, *S. osmophilus* and *S. cryophilus* were used as  
1645 input for MEME. MEME analyses were conducted for each species separately and for all  
1646 species combined. **(B)** *wtf* genes containing the FLEX motif in intron 1. The motif scanning tool  
1647 FIMO was used to find the FLEX motif in the genomes of *S. pombe*, *S. octosporus*, *S.*  
1648 *cryophilus* and *S. osmophilus*. The 11-bp FLEX motif identified by the MEME analysis using 146  
1649 genes as input was provided to FIMO for motif scanning. All *wtf* genes containing a FIMO hit in  
1650 intron 1 are shown with the *P* value of the FIMO hit in intron 1 presented on a  $-\log_{10}$  scale. We  
1651 found the default *P* value cutoff of FIMO ( $1E-4$ ) being too loose and applied a cutoff of  $3E-6$  to  
1652 distinguish confident hits from unreliable hits.

1653

1654 **Figure 2-figure supplement 3: Transcription levels of predicted poison and antidote**  
1655 **isoforms of intact *wtf* genes in *S. octosporus*.**

1656 Long-read (Oxford Nanopore) RNA sequencing was performed on mRNAs isolated from *S.*  
1657 *octosporus* cells undergoing meiosis. All intact *wtf* genes are shown with the read count of the  
1658 long transcript (encoding putative antidote) in grey and the read count of the short transcript  
1659 (encoding putative poison) in black. The bold gene names indicate the genes with a confident  
1660 FLEX motif hit in intron 1. The underlined gene names indicate the genes analyzed by deletion  
1661 (Figures 8-9). The read counts of the two isoforms can be found in Table S2.

1662

1663 **Figure 3: Genomic context of *wtf* genes.**

1664 The *wtf* genes are found in a limited number of genomic contexts. The *wtf* genes are  
1665 represented as orange boxes, *wag* genes are in blue, and LTRs are in yellow. NA indicates not  
1666 applicable as *wag* genes are absent from *S. pombe* and LTRs are absent from *S. octosporus*.

1667

1668 **Figure 3-figure supplement 1: Distance between 5S rDNA and *wtf* genes.**

1669 The distance in base pairs between 5S rDNA and the coding sequence of a *wtf* gene in **(A)** *S.*  
1670 *osmophilus* and **(B)** *S. octosporus*. Only *wtf* genes with a flanking 5S rDNA were considered.  
1671 The *wtf* gene is collapsed at 0 and the flanking sequences were considered in 100 base pair  
1672 bins.

1673

1674 **Figure 3-figure supplement 2 Homology between distinct 5S rDNA-*wtf* and *wag-wtf* units.**

1675 The regions containing *wtf* genes with the indicated genomic contexts were aligned with MAFFT  
1676 to find the percent sequences identity (Kato, 2002; Kato and Standley, 2013). The percent  
1677 identity is shown in 50 base pair sliding windows. **(A)** The percent identity shared amongst  
1678 37 *wtf*-5S rDNA units from *S. octosporus*. **(B)** The percent identity shared amongst 17 *wtf*-  
1679 *wag* units from *S. octosporus*.

1680

1681 **Figure 3-figure supplement 2-source data 1: Multi-alignment of 37 *S. octosporus* 5S  
1682 rDNA-*wtf* units.**

1683 DNA MAFFT alignment of 37 5S rDNA-*wtf*-5S rDNA unit of *S. octosporus* used to make Figure  
1684 3-figure supplement 2A.

1685

1686 **Figure 3-figure supplement 2-source data 2: Multi-alignment of 17 *S. octosporus wtf-wag*  
1687 units.**

1688 Multi DNA alignment using MAFFT of 17 *wtf-wag* units from *S. octosporus* used to make Figure  
1689 3-figure supplement 2B.

1690

1691 **Figure 3-figure supplement 3: *S. octosporus wtf* gene units supported by maximum  
1692 likelihood phylogeny.**

1693 The regions flanking the *wtf* genes in *S. octosporus* were sorted into the color-coded groups  
1694 shown based on maximum phylogenies shown in Figure 3-figure supplement 4 and Figure 3-  
1695 figure supplement 5. Orange boxes correspond to *wtf* genes, the red boxes represent 5S rDNA  
1696 genes, and the blue boxes represent *wag* genes. Genomic contexts without *wag* genes and with  
1697 *wag* genes are shown separately in **(A)** and **(B)**.

1698

1699 **Figure 3-figure supplement 4: Maximum likelihood phylogeny of the regions between *S.*  
1700 *octosporus wtf* genes and a downstream flanking 5S rDNA gene.**

1701 The regions downstream of 67 *S. octosporus wtf* genes with a downstream 5S rDNA gene were  
1702 aligned with MAFFT (Kato, 2002) and a maximum likelihood phylogeny was built with  
1703 PhyML(Guindon et al., 2010). Branch support values shown at the nodes (0-1) are SH-like  
1704 aLRT values. The shaded clades and letter designations correspond to the colors and letters  
1705 shown in Figure 3-figure supplement 3.

1706

1707 **Figure 3-figure supplement 4-source data 1: Multi-alignment of the regions downstream  
1708 of 67 *S. octosporus wtf* with a downstream 5S rDNA.**

1709 DNA alignment built using MAFFT of the regions downstream of 67 *S. octosporus wtf* with a  
1710 downstream 5S rDNA.

1711

1712 **Figure 3-figure supplement 4-source data 2: Phylogeny of the regions downstream of 67  
1713 *S. octosporus wtf* genes with a downstream 5S rDNA.**

1714 Phylogeny generated by PhyML of the downstream regions of 67 *S. octosporus wtf* genes with  
1715 a downstream 5S rDNA in Newick format (Guindon et al., 2010). The labels are SH-like aLRT  
1716 values for support of the nodes (0-1).

1717

1718 **Figure 3-figure supplement 5: Maximum likelihood phylogeny of the regions between *S.***  
1719 ***octosporus wtf* genes and an upstream flanking 5S rDNA gene.**

1720 The regions upstream of 40 *S. octosporus wtf* genes with an upstream 5S rDNA gene were  
1721 aligned with MAFFT and a maximum likelihood phylogeny was built with PhyML. Branch support  
1722 values shown at the nodes (0-1) are SH-like aLRT values. The shaded clades and letter  
1723 designations correspond to the colors and letters shown in Figure 3-figure supplement 3.

1724

1725 **Figure 3-figure supplement 5-source data 1: Multi-alignment of the regions upstream of**  
1726 **40 *S. octosporus wtf* with an upstream 5S rDNA.**

1727 DNA alignment made using MAFFT of the regions upstream of 40 *S. octosporus wtf* genes with  
1728 an upstream 5S rDNA.

1729

1730 **Figure 3-figure supplement 5-source data 2: Phylogeny of the regions upstream of 40 *S.***  
1731 ***octosporus wtf* genes with an upstream 5S rDNA.**

1732 Phylogeny generated by PhyML of the upstream regions of 40 *S. octosporus wtf* genes with an  
1733 upstream 5S rDNA in a Newick format. The labels are SH-like aLRT values for support of the  
1734 nodes (0-1).

1735

1736 **Figure 3-figure supplement 6: Maximum likelihood phylogeny of *S. octosporus***  
1737 ***wtf* genes.**

1738 The sequences of 83 *S. octosporus wtf* genes were aligned using MAFFT and a maximum  
1739 likelihood phylogeny was constructed using PhyML. Branch support values shown at the nodes

1740 (0-1) are SH-like aLRT values. The color-coded letter designations to the right of the gene  
1741 names indicate the phylogenetic groupings of the sequences flanking the *wtf* genes from Figure  
1742 3-figure supplement 3.

1743

1744 **Figure 3-figure supplement 6-source data 1: Multi-alignment of 83 *S. octosporus wtf***  
1745 **genes.**

1746 DNA multi-alignment using MAFFT of 83 *S. octosporus wtf* genes in PHYLIP format.

1747

1748 **Figure 3-figure supplement 6-source data 2: Phylogeny of 83 *S. octosporus wtf* genes.**

1749 Phylogeny generated by PhyML of 83 *S. octosporus wtf* genes in Newick format. Support values  
1750 are SH-like aLRT values (0-1).

1751

1752 **Figure 4: Shared *wtf* locus in three fission yeast species.**

1753 **(A)** The syntenic region between *clr4* and *met17* in *S. octosporus*, *S. osmophilus*, *S.*

1754 *cryophilus*, and *S. pombe* is shown. The *S. pombe* locus shown is from the *S.*

1755 *kambucha* isolate. The orange boxes represent *wtf* genes, the blue boxes represent *wag* genes,

1756 the red arrows represent 5S rDNA, the green arrow represents *tRNA-his*, the grey boxes

1757 represent genes without a homolog in this region in the species shown and the black boxes

1758 represent genes that are syntenic between the species. The phylogenetic relationship between

1759 species is shown to the left of the DNA representation. The orthologs of *clr4* **(B)** and *met17* **(C)**

1760 were aligned and used to build neighbor-joining trees that were midpoint rooted. Branch support

1761 (0-100) was calculated using bootstrap.

1762

1763 **Figure 4-source data 1: Multi-alignment of *Schizosaccharomyces clr4* genes and**  
1764 **neighbor-joining tree.**



1765 DNA MAFFT alignment of *Schizosaccharomyces clr4* from *S. octosporus*, *S. osmophilus*, *S.*  
1766 *cryophilus*, *S. pombe*, and *S. japonicus* in PHYLIP format.

1767

1768 **Figure 4-source data 2: Neighbor-joining tree of *Schizosaccharomyces clr4* genes.**

1769 Phylogenetic tree of *Schizosaccharomyces clr4* from *S. octosporus*, *S. osmophilus*, *S.*

1770 *cryophilus*, *S. pombe*, and *S. japonicus* in Newick format. Bootstrap values are displayed from 0

1771 to 100.

1772

1773 **Figure 4-source data 3: Multi-alignment of *Schizosaccharomyces met17* genes.**

1774 DNA MAFFT alignment of *Schizosaccharomyces met17* from *S. octosporus*, *S. osmophilus*, *S.*

1775 *cryophilus*, *S. pombe*, and *S. japonicus* in PHYLIP format.

1776

1777 **Figure 4-source data 4: Neighbor-joining tree of *Schizosaccharomyces met17* genes.**

1778 Neighbor-joining tree of *Schizosaccharomyces met17* from *S. octosporus*, *S. osmophilus*, *S.*

1779 *cryophilus*, *S. pombe*, and *S. japonicus* in Newick format. Bootstrap values are displayed from 0

1780 to 100.

1781

1782 **Figure 4-figure supplement 1: Synteny between *S. cryophilus wtf4* and *S. pombe wtf6*.**

1783 (A) The syntenic region containing *cyp9* and *ago1* is shown for all fission yeast species. An

1784 inversion in the *S. pombe* lineage separated *cyp9* and *ago1*. There is a *wtf* gene upstream of

1785 *ago1* in both *S. pombe* and *S. cryophilus*. The orange boxes represent the *wtf* genes. Five

1786 genes are numbered and shown in green to illustrate that the ancestor of *S. pombe* and *S.*

1787 *cryophilus* likely had a *wtf* gene between *cyp9* and *ago1*. The black boxes represent additional

1788 orthologous genes in synteny. The orthologs of *cyp9* (B) and *ago1* (C) were aligned and used to

1789 build neighbor-joining trees that were midpoint rooted. Branch support (0-100) was calculated

1790 using bootstrap.

1791

1792 **Figure 4-figure supplement 1-source data 1: Multi-alignment of *Schizosaccharomyces***  
1793 ***ago1* genes and neighbor-joining tree.**

1794 DNA alignment built using MAFFT of *Schizosaccharomyces ago1* from *S. octosporus*, *S.*  
1795 *osmophilus*, *S. cryophilus*, *S. pombe*, and *S. japonicus* in PHYLIP format.

1796

1797 **Figure 4-figure supplement 1-source data 2: Neighbor-joining tree of**  
1798 ***Schizosaccharomyces ago1* genes.**

1799 Neighbor-joining tree of *Schizosaccharomyces ago1* in Newick format. Bootstrap values are  
1800 displayed from 0 to 100.

1801

1802 **Figure 4-figure supplement 1-source data 3: Multi-alignment of *Schizosaccharomyces***  
1803 ***cyp9* genes.**

1804 DNA alignment built using MAFFT of *Schizosaccharomyces cyp9* from *S. octosporus*, *S.*  
1805 *osmophilus*, *S. cryophilus*, *S. pombe*, and *S. japonicus* in PHYLIP format.

1806

1807 **Figure 4-figure supplement 1-source data 4: Neighbor-joining tree of**  
1808 ***Schizosaccharomyces cyp9* genes.**

1809 Phylogeny of *Schizosaccharomyces cyp9* from *S. octosporus*, *S. osmophilus*, *S. cryophilus*, *S.*  
1810 *pombe*, and *S. japonicus* phylogenetic tree of *Schizosaccharomyces met17* in Newick format.

1811

1812 **Figure 5: Gene duplication and non-allelic gene conversion within *wtf* gene family.**

1813 All the predicted intact *Wtf* antidote amino acid sequences were aligned using MAFFT from  
1814 Figure 2-figure supplement 1-source data 1 and used to build a maximum likelihood tree using  
1815 PhyML. The *S. pombe* sequences were from the FY29033 isolate as it has more *wtf* genes than  
1816 the reference genome. The *S. pombe* genes are shown in black, *S. octosporus* genes are in

1817 magenta, *S. osmophilus* genes are dark blue, and the *S. cryophilus* genes are cyan. The  
1818 triangles represent multiple genes with the precise number indicated on the right. The branch  
1819 support values (0-1) are SH-like aLRT values and are shown at each node.

1820

1821 **Figure 5-source data 1: Maximum Likelihood phylogeny of 113 *wtf* genes.**

1822 Phylogenetic tree of 113 *wtf* genes from *S. octosporus*, *S. cryophilus*, *S. osmophilus*, and *S.*  
1823 *pombe* in Newick format. Branch support values are SH-like aLRT values.

1824

1825 **Figure 5-figure supplement 1: GARD analysis consistent with non-allelic gene conversion**  
1826 **within *wtf* genes.**

1827 We used GARD (genetic algorithm for the detection of recombination) (Kosakovsky Pond et al.,  
1828 2006b) analysis to look for evidence of gene conversion within the *wtf* genes of **(A)** *S.*  
1829 *octosporus*, **(B)** *S. osmophilus* and **(C)** *S. pombe*. We considered only genes predicted to be  
1830 meiotic drivers or suppressors. This analysis found that a hypothesis allowing multiple trees for  
1831 different segments of the alignment is >100 times more likely than a hypothesis allowing only a  
1832 single tree, supporting that non-allelic recombination has occurred within *wtf* genes. The  
1833 analysis identified two likely breakpoints in each species. For *S. pombe* the analysis is from  
1834 (Eickbush et al., 2019).

1835

1836 **Figure 5-figure supplement 1-source data 1: GARD analysis of *S. octosporus wtf* genes.**

1837 GARD analysis of *S. octosporus wtf* predicted meiotic drivers and suppressors. This analysis  
1838 found that a hypothesis allowing multiple trees for different segments of the alignment is >100  
1839 times more likely than a hypothesis allowing only a single tree, supporting that nonallelic  
1840 recombination has occurred within the gene family. The analysis identified two likely breakpoints  
1841 corresponding to positions 204 and 355 in the alignment, yielding three segments as depicted  
1842 by the colored rectangles at the top of the figure. Both breakpoints have strong statistical

1843 support (\*\*\*,  $p < 0.0004$ ). The trees generated for each segment (below) are distinct. The yellow  
1844 highlighting is to help illustrate the incongruence between the trees.

1845

1846 **Figure 5-figure supplement 1 source data 2: GARD analysis of *S. osmophilus wtf* genes.**

1847 GARD analysis of *S. osmophilus wtf* predicted meiotic drivers and suppressors. This analysis  
1848 found that a hypothesis allowing multiple trees for different segments of the alignment is >100  
1849 times more likely than a hypothesis allowing only a single tree, supporting that nonallelic  
1850 recombination has occurred within the gene family. The analysis identified two likely breakpoints  
1851 corresponding to positions 159 and 298 in the alignment, yielding three segments as depicted  
1852 by the colored rectangles at the top of the figure. Both breakpoints have strong statistical  
1853 support (\*\*\*,  $p < 0.0004$ ). The trees generated for each segment (below) are distinct. The yellow  
1854 highlighting is to help illustrate the incongruence between the trees.

1855

1856 **Figure 5-figure supplement 2: Contraction and expansion of repeat sequences in**  
1857 ***wtf* genes.**

1858 The *wtf* genes of *S. octosporus* (A) *S. osmophilus* (C), and *S. pombe* (E) can contain the  
1859 indicated repetitive sequences. The DNA (top) and amino acid (bottom) sequences logos  
1860 representing the repeat regions are shown for each species. The size distribution of the repeat  
1861 regions for all *S. octosporus* (A) *S. osmophilus* (C), and *S. pombe* (E) *wtf* genes is shown. The  
1862 sizes are presented in base pairs instead of repeat units because the terminal repeats are not  
1863 always full length. The *S. pombe* data are from (Eickbush et al., 2019). The repeat count in exon  
1864 4 of *S. octosporus wtf* genes and the repeat count in exon 4 of *S. osmophilus wtf* genes is  
1865 shown in supplementary Table S21.

1866

1867 **Figure 6: *wtf* genes duplicated into pre-existing 5S rDNA.**

1868 Testing if lineage restricted *wtf* genes occur at sites where the ancestral species is inferred to  
1869 have had a 5S rDNA gene. An example of this situation is illustrated in **(A)** where species A has  
1870 a 5S-rDNA-flanked *wtf* gene and species B has a 5S rDNA gene at the syntenic locus. **(B)**  
1871 Number of *wtf*+5S rDNA loci in species A (any of the gene layouts illustrated in **(A)**) with 5S  
1872 rDNA at the syntenic locus in species B. This analysis only considers loci that contain 5S-rDNA-  
1873 flanked *wtf* gene in species A but contain no *wtf* genes in species B. Table S16 and S17 were  
1874 used to test this hypothesis.

1875

1876 **Figure 6-figure supplement 1: *wtf* gene duplication models.**

1877 **(A)** Model of duplication via non-allelic gene conversion: 1) double strand of DNA with 5S rDNA  
1878 depicted in red. 2) A double strand DNA break (DSB) within the 5S rDNA 3) 5' end resection. 4)  
1879 Strand invasion of an ectopic locus with a *wtf* gene flanked by 5S rDNA genes. 5) The repair  
1880 template containing the *wtf* gene is copied to the site of the initiating DSB. 6) Strand  
1881 displacement and annealing of the broken DNA. 7) Synthesis of DNA with *wtf* gene in the other  
1882 strand and ligation to finalize repair. 8) *wtf* gene duplicated in a new locus **(B)** 1) 5S rDNA-*wtf*-  
1883 5S rDNA unit. 2) Crossing-over between 5S rDNA repeats flanking a *wtf* gene can generate an  
1884 extrachromosomal circular DNA. 3) This circle can recombine with an ectopic locus containing a  
1885 5S rDNA. 4) Generation of a new *wtf* locus.

1886

1887 **Figure 7: *wtf* genes can encode for poison and antidote proteins.**

1888 Spot assay of serial dilutions of *S. cerevisiae* cells on non-inducing (SC -His -Trp -Ura) and  
1889 inducing (SC -His -Trp -Ura +500 nM  $\beta$ -estradiol) media. Each strain contains [*TRP1*] and  
1890 [*URA3*] ARS CEN plasmids that are either empty (EV) or carry the indicated  $\beta$ -estradiol  
1891 inducible *wtf* alleles. **(A)** *S. octosporus wtf25<sup>poison</sup>-GFP* and *wtf25<sup>antidote</sup>-mCherry* **(B)** *S.*  
1892 *osmophilus wtf41<sup>poison</sup>* and *wtf41<sup>antidote</sup>*, and **(C)** *S. cryophilus wtf1<sup>poison</sup>* and *wtf1<sup>antidote</sup>*. The dilution  
1893 factor is 0.2 starting at OD=1. **(D)** A representative cell carrying a [*URA3*] plasmid with  $\beta$ -

1894 estradiol inducible *S. octosporus wtf25<sup>poison</sup>-GFP* (cyan). **(E)** A representative cell carrying a  
1895 [*TRP1*] plasmid with  $\beta$ -estradiol inducible *S. octosporus wtf25<sup>antidote</sup>-mCherry* (magenta). **(F)** A  
1896 representative *S. cerevisiae* cell carrying a [*URA3*] plasmid with  $\beta$ -estradiol inducible *S.*  
1897 *octosporus wtf25<sup>poison</sup>-GFP* (cyan) and [*TRP1*] plasmid with  $\beta$ -estradiol inducible *S. octosporus*  
1898 *wtf25<sup>antidote</sup>-mCherry* (magenta). In all the experiments, the cells were imaged approximately 4  
1899 hours after induction with 500 nM  $\beta$ -estradiol. TL= transmitted light. Scale bar represents 2  $\mu$ m.

1900

1901 **Figure 7-figure supplement 1: Some *wtf* genes outside of *S. pombe* encode for poison**  
1902 **and antidote proteins.**

1903 Spot assay of serial dilutions of *S. cerevisiae* cells on non-inducing (SC -His -Trp -Ura) and  
1904 inducing (SC -His -Trp -Ura +500 nM  $\beta$ -estradiol) media. Each strain contains [*TRP1*] and  
1905 [*URA3*] ARS CEN plasmids that are either empty (EV) or carry the indicated  $\beta$ -estradiol  
1906 inducible alleles. **(A)** *S. osmophilus wtf19<sup>poison</sup>* and *wtf19<sup>antidote</sup>* **(B)** *S. octosporus wtf61<sup>poison</sup>* and  
1907 *wtf61<sup>antidote</sup>*. The dilution factor is 0.1 for **(A)** 0.2 for **(B)** with a starting OD=1 for both panels.

1908

1909 **Figure 7-figure supplement 2: Non-cognate Wtf<sup>antidotes</sup> fail to rescue cells from Wtf<sup>poisons</sup>.**

1910 Spot assay of serial dilutions of *S. cerevisiae* cells on non-inducing (SC -His -Trp -Ura) and  
1911 inducing (SC -His -Trp -Ura +500 nM  $\beta$ -estradiol) media. Each strain contains [*TRP1*] and  
1912 [*URA3*] ARS CEN plasmids that are either empty (EV) or carry the indicated  $\beta$ -estradiol  
1913 inducible *Wtf<sup>poison</sup>* and *wtf<sup>antidote</sup>* alleles. **(A)** *S. octosporus wtf61* and *S. osmophilus wtf41* **(B)** *S.*  
1914 *cryophilus wtf1* and *S. osmophilus wtf41* **(C)** *S. octosporus wtf61* and *S. octosporus wtf25* **(D)** *S.*  
1915 *cryophilus wtf1* and *S. octosporus wtf25* and **(E)** *S. pombe wtf4* and *S. octosporus wtf25*. In **C-E**,  
1916 the *Wtf25<sup>poison</sup>* protein was tagged with GFP and the *Wtf25<sup>antidote</sup>* protein was tagged with  
1917 mCherry. The percent identity between the coding sequences of the *wtf<sup>poison</sup>* alleles and the  
1918 percent amino acid identity shared by the *Wtf<sup>poison</sup>* proteins is shown at the top of each panel.  
1919 The dilution factor for all plates is 0.2 starting at OD=1.

1920

1921 **Figure 7- figure supplement 3: The distribution of *S. octosporus* Wtf25 proteins is similar**  
1922 **to *S. pombe* Wtf4 proteins.**

1923 **(A)** Images of cells carrying a [*URA3*] plasmid with  $\beta$ -estradiol inducible *S. octosporus*  
1924 *wtf25<sup>poison</sup>-GFP*. Wtf25<sup>poison</sup>-GFP signal is distributed in the cytoplasm, with potential  
1925 endoplasmic reticulum (ER) localization (yellow arrows). **(B)** Images of cells carrying a [*TRP1*]  
1926 plasmid with  $\beta$ -estradiol inducible *S. octosporus wtf25<sup>antidote</sup>-mCherry* (magenta). Wtf25<sup>antidote</sup>-  
1927 mCherry signal can be observed within vacuoles (white arrows) and as large aggregates (yellow  
1928 arrows). **(C)** Images of cells carrying a [*URA3*] plasmid with  $\beta$ -estradiol inducible *S. octosporus*  
1929 *wtf25<sup>poison</sup>-GFP* (cyan) and [*TRP1*] plasmid with  $\beta$ -estradiol inducible *S. octosporus wtf25<sup>antidote</sup>-*  
1930 *mCherry* (magenta). There is colocalization of Wtf25<sup>poison</sup>-GFP and Wtf25<sup>antidote</sup>-mCherry signal  
1931 within vacuoles (black arrows). In all the experiments, the cells were imaged approximately 4  
1932 hours after induction with 500 nM  $\beta$ -estradiol. TL= transmitted light. Scale bars represents 2  $\mu$ m.  
1933 All images were captured with the same settings. Images in panel A are not shown at the same  
1934 brightness and contrast as panels B and C to better visualize the signal.

1935

1936 **Figure 8: Three *S. octosporus wtf* genes, when individually deleted, caused spore**  
1937 **viability loss in heterozygous crosses but not in homozygous crosses.**

1938 Deletion mutants of seven *S. octosporus wtf* genes were obtained, and crosses were  
1939 performed. Heterozygous deletion cross but not homozygous deletion cross  
1940 of *wtf25*, *wtf68* or *wtf33* resulted in significant spore viability loss. Spore viability was measured  
1941 using octad dissection analysis (see methods). Representative octads are shown in Figure 9,  
1942 Figure 9-supplements 1-6 and Figure 8 and 9-source data 2. Numerical data are provided in  
1943 Table S21. *P* values (Fisher's exact test) for crosses with > 5% spore viability reduction  
1944 compared to the wild-type control are shown and calculated in Figure 8-source data 1.

1945



1946 **Figure 8-source data 1: Octad analysis tables.**

1947 Summary of spore viability is shown in table 1 and tables 2-8 test the significance of the  
1948 difference of spore viability by Fisher's exact test.

1949

1950 **Figure 8-source data 2: Octad dissection raw data.**

1951 Wild type cross raw data files are shown as a pdf file with each cross in the upper left of the  
1952 images.

1953

1954 **Figure 9: Some *S. octosporus wtf* genes cause meiotic drive.**

1955 **(A)** Representative octads dissected from asci produced from a *wtf25* heterozygous deletion  
1956 cross. The labels A to H indicate the 8 spores dissected from each ascus and the labels 1 to 11  
1957 indicate the 11 asci analyzed. The genotypes of clones were determined by replica plating onto  
1958 antibiotic-containing plates. Raw data of all octads can be found in Figure 9-source data 2.

1959 **(B)** The percentages of spores that were viable and with indicated genotypes produced by  
1960 *wtf25<sup>+</sup>/wtf25 $\Delta$*  cross. The *P* value was calculated using exact binomial test and numerical data  
1961 are provided in Figure 9-source data 1. **(C)** Classification of octads derived from  
1962 *wtf25<sup>+</sup>/wtf25 $\Delta$*  cross according to the number of viable spores with and without a *wtf* gene  
1963 deletion. The *P* values were calculated using the exact binomial test. The *P* values are only  
1964 displayed if a pair of octad types have more than 5 octads in total, as *P* values cannot reach the  
1965 significance threshold if the total number of octads  $\leq 5$ . **(D)** Correlation between transmission  
1966 distortion ratio and poison isoform expression level. The transmission distortion ratio represents  
1967 the proportion of *wtf* containing spores in total viable spores produced by a  
1968 *wtf<sup>+</sup>/wtf $\Delta$*  heterozygote and the read counts are those shown in Figure 2-figure supplement 3.  
1969 Numerical data of transmission distortion ratio of each *wtf* gene can be found in Table S21-S27.

1970

1971 **Figure 9-source data 1: Numerical data of the octad dissection analysis of *wtf25***

1972 **heterozygous deletion cross.**

1973 Octad analysis table with spore viability of *wtf25<sup>+</sup>/wtf25 $\Delta$*  heterozygous cross can be found in

1974 table 1.1. Corresponding octad genotypes are found in table 1.2. Spore viability data of

1975 homozygous diploid are in table 2. Exact binomial test was performed in table 3.1, and the

1976 Fisher's exact test is calculated in table 3.2.

1977

1978 **Figure 9-source data 2: *wtf25* heterozygous diploid octad dissection raw data.**

1979 *wtf25<sup>+</sup>/wtf25 $\Delta$*  heterozygous diploid raw data files are shown as a pdf file with each cross in the

1980 upper left of the images.

1981

1982 **Figure 9-source data 3: *wtf25* homozygous diploid octad dissection raw data.**

1983 *wtf25 $\Delta$ /wtf25 $\Delta$*  homozygous diploid raw data files are shown as a pdf file with each cross in the

1984 upper left of the images.

1985

1986 **Figure 9-figure supplement 1: Octad dissection analysis of *wtf68* heterozygous deletion**

1987 **cross.**

1988 **(A)** Representative octads dissected from asci produced from a *wtf68* heterozygous deletion

1989 cross. The labels A to H indicate the 8 spores dissected from each ascus and the labels 1 to 11

1990 indicate the 11 asci analyzed. The genotypes of clones were determined by replica plating. Raw

1991 data of all octads can be found in Figure 9-figure supplement 1-source data 2. **(B)** The

1992 percentages of spores that were viable and with indicated genotypes in *wtf68<sup>+</sup>/wtf68 $\Delta$*  cross.

1993 The *P* value was calculated using exact binomial test and numerical data are provided in Figure

1994 9-figure supplement 1-source data 1. **(C)** Classification of octads derived from

1995 *wtf68<sup>+</sup>/wtf68 $\Delta$*  cross according to the number of viable spores with and without a *wtf* gene

1996 deletion. The *P* values were calculated using the exact binomial test. The *P* values are only

1997 displayed if a pair of octad types have more than 5 octads in total, as  $P$  values cannot reach the  
1998 significance threshold if the total number of octads  $\leq 5$ .

1999

2000 **Figure 9-figure supplement 1-source data 1: Numerical data of the octad dissection**  
2001 **analysis of *wtf68* heterozygous deletion cross.**

2002 Raw data file with spore viability of *wtf68<sup>+</sup>/wtf68 $\Delta$*  heterozygous cross can be found in table 1.1.

2003 Corresponding octad genotypes are found in table 1.2. Spore viability data of homozygous  
2004 diploid are in table 2. Exact binomial test was performed in table 3.1, and the Fisher's exact test  
2005 is calculated in table 3.2.

2006

2007 **Figure 9-figure supplement 1-source data 2: *wtf68* heterozygous diploid octad dissection**  
2008 **raw data.**

2009 *wtf68<sup>+</sup>/wtf68 $\Delta$*  heterozygous diploid raw data files are shown as a pdf file with each cross in the  
2010 upper left of the images.

2011

2012 **Figure 9-figure supplement 1-source data 3: *wtf68* homozygous diploid octad dissection**  
2013 **raw data.**

2014 *wtf68 $\Delta$ /wtf68 $\Delta$*  homozygous diploid raw data files are shown as a pdf file with each cross in the  
2015 upper left of the images.

2016

2017 **Figure 9-figure supplement 2: Octad dissection analysis of *wtf33* heterozygous deletion**  
2018 **cross.**

2019 **(A)** Representative octads dissected from asci produced from a *wtf33* heterozygous deletion  
2020 cross. The labels A to H indicate the 8 spores dissected from each ascus and the labels 1 to 11  
2021 indicate the 11 asci analyzed. The genotypes of clones were determined by replica plating. Raw  
2022 data of all octads can be found in Figure 9-figure supplement 2-source data 2. **(B)** The

2023 percentages of spores that were viable and with indicated genotypes in *wtf33<sup>+</sup>/wtf33Δ* cross.  
2024 The *P* value was calculated using exact binomial test and numerical data are provided in Figure  
2025 9-supplement 2-source data 1. **(C)** Classification of octads derived from *wtf33<sup>+</sup>/wtf33Δ* cross  
2026 according to the number of viable spores with and without a *wtf* gene deletion. The *P* values  
2027 were calculated using the exact binomial test. The *P* values are only displayed if a pair of octad  
2028 types have more than 5 octads in total, as *P* values cannot reach the significance threshold if  
2029 the total number of octads  $\leq 5$ .

2030

2031 **Figure 9-figure supplement 2-source data 1: Numerical data of the octad dissection**  
2032 **analysis of *wtf33* heterozygous deletion cross.**

2033 Raw data file with spore viability of *wtf33<sup>+</sup>/wtf33Δ* heterozygous cross can be found in table 1.1.  
2034 Corresponding octad genotypes are found in table 1.2. Spore viability data of homozygous  
2035 diploid are in table 2. Exact binomial test was performed in table 3.1, and the Fisher's exact test  
2036 is calculated in table 3.2.

2037

2038 **Figure 9-figure supplement 2-source data 2: *wtf33* heterozygous diploid octad dissection**  
2039 **raw data.**

2040 *wtf33<sup>+</sup>/wtf33Δ* heterozygous diploid raw data files are shown as a pdf file with each cross in the  
2041 upper left of the images.

2042

2043 **Figure 9-figure supplement 2-source data 3: *wtf33* homozygous diploid octad dissection**  
2044 **raw data.**

2045 *wtf33Δ/wtf33Δ* homozygous diploid raw data files are shown as a pdf file with each cross in the  
2046 upper left of the images.

2047

2048 **Figure 9-figure supplement 3: Octad dissection analysis of *wtf60* heterozygous deletion**

2049 **cross.**

2050 **(A)** Representative octads dissected from asci produced from a *wtf60* heterozygous deletion

2051 cross. The labels A to H indicate the 8 spores dissected from each ascus and the labels 1 to 11

2052 indicate the 11 asci analyzed. The genotypes of clones were determined by replica plating. Raw

2053 data of all octads can be found in Figure 9-figure supplement 4-source data 2. **(B)** The

2054 percentage of spores that were viable and with indicated genotypes in *wtf60<sup>+</sup>/wtf60 $\Delta$*  cross. The

2055 *P* value was calculated using exact binomial test and numerical data are provided in Figure 9-

2056 figure supplement 4-source data 1. **(C)** Classification of octads derived from *wtf60<sup>+</sup>/wtf60 $\Delta$*  cross

2057 according to the number of viable spores with and without a *wtf* gene deletion. The *P* values

2058 were calculated using the exact binomial test. The *P* values are only displayed if a pair of octad

2059 types have more than 5 octads in total, as *P* values cannot reach the significance threshold if

2060 the total number of octads  $\leq 5$ .

2061

2062 **Figure 9-figure supplement 3-source data 1: Numerical data of the octad dissection**

2063 **analysis of *wtf60* heterozygous deletion cross.**

2064 Raw data file with spore viability of *wtf60<sup>+</sup>/wtf60 $\Delta$*  heterozygous cross can be found in table 1.1.

2065 Corresponding octad genotypes are found in table 1.2. Spore viability data of homozygous

2066 diploid are in table 2. Exact binomial test was performed in table 3.1, and the Fisher's exact test

2067 is calculated in table 3.2.

2068

2069 **Figure 9-figure supplement 3-source data 2: *wtf60* heterozygous diploid octad dissection**

2070 **raw data.**

2071 *wtf60<sup>+</sup>/wtf60 $\Delta$*  heterozygous diploid raw data files are shown as a pdf file with each cross in the

2072 upper left of the images.

2073

2074 **Figure 9-figure supplement 3-source data 3: *wtf60* homozygous diploid octad dissection**  
2075 **raw data.**

2076 *wtf60Δ/ wtf60Δ* homozygous diploid raw data files are shown as a pdf file with each cross in the  
2077 upper left of the images.

2078

2079 **Figure 9-figure supplement 4: Octad dissection analysis of *wtf46* heterozygous deletion**  
2080 **cross.**

2081 **(A)** Representative octads dissected from asci produced from a *wtf46* heterozygous deletion  
2082 cross. The labels A to H indicate the 8 spores dissected from each ascus and the labels 1 to 11  
2083 indicate the 11 asci analyzed. The genotypes of clones were determined by replica plating. Raw  
2084 data of all octads can be found in Figure 9-figure supplement 3-source data 2. **(B)** The  
2085 percentage of spores that were viable and with indicated genotypes in *wtf46<sup>+</sup>/wtf46Δ* cross. The  
2086 *P* value was calculated using exact binomial test and numerical data are provided in Figure 9-  
2087 figure supplement 3-source data 1. **(C)** Classification of octads derived from *wtf46<sup>+</sup>/wtf46Δ* cross  
2088 according to the number of viable spores with and without a *wtf* gene deletion. The *P* values  
2089 were calculated using the exact binomial test. The *P* values are only displayed if a pair of octad  
2090 types have more than 5 octads in total, as *P* values cannot reach the significance threshold if  
2091 the total number of octads  $\leq 5$ .

2092

2093 **Figure 9-figure supplement 4-source data 1: Numerical data of the octad dissection**  
2094 **analysis of *wtf46* heterozygous deletion cross.**

2095 Raw data file with spore viability of *wtf46<sup>+</sup>/wtf46Δ* heterozygous cross can be found in table 1.1.  
2096 Corresponding octad genotypes are found in table 1.2. Spore viability data of homozygous  
2097 diploid are in table 2. Exact binomial test was performed in table 3.1, and the Fisher's exact test  
2098 is calculated in table 3.2.

2099

2100 **Figure 9-figure supplement 4-source data 2: *wtf46* heterozygous diploid octad dissection**

2101 **raw data.**

2102 *wtf46<sup>+</sup>/wtf46Δ* heterozygous diploid raw data files are shown as a pdf file with each cross in the  
2103 upper left of the images.

2104

2105 **Figure 9-figure supplement 4-source data 3: *wtf46* homozygous diploid octad dissection**

2106 **raw data.**

2107 *wtf46Δ/wtf46Δ* homozygous diploid raw data files are shown as a pdf file with each cross in the  
2108 upper left of the images.

2109

2110 **Figure 9-figure supplement 5: Octad dissection analysis of *wtf21* heterozygous deletion**

2111 **cross.**

2112 **(A)** Representative octads dissected from asci produced from a *wtf21* heterozygous diploid. The  
2113 coordinates A to H stands for 8 spores dissected from one ascus rows 1 to 11 represent 11  
2114 octad asci analyzed. The genotypes of clones were determined by replica plating. Raw data of  
2115 all octads can be found in Figure 9-figure supplement 6-source data 1. **(B)** The percentage of  
2116 spores that were viable and with indicated genotypes in *wtf21<sup>+</sup>/wtf21Δ* cross. The *P* value was  
2117 calculated using exact binomial test and numerical data are provided in Figure 9-figure  
2118 supplement 6-source data 1. **(C)** Classification of octads derived from *wtf21<sup>+</sup>/wtf21Δ* cross  
2119 according to the number of viable spores with and without a *wtf* gene deletion. The *P* values  
2120 were calculated using the exact binomial test. The *P* values are only displayed if a pair of octad  
2121 types have more than 5 octads in total, as *P* values cannot reach the significance threshold if  
2122 the total number of octads  $\leq 5$ .

2123

2124 **Figure 9-figure supplement 5-source data 1: Numerical data of the octad dissection**

2125 **analysis of *wtf21* heterozygous deletion cross.**



2126 Raw data file with spore viability of *wtf21<sup>+</sup>/wtf21Δ* heterozygous cross can be found in table 1.1.  
2127 Corresponding octad genotypes are found in table 1.2. Spore viability data of homozygous  
2128 diploid are in table 2. Exact binomial test was performed in table 3.1, and the Fisher's exact test  
2129 is calculated in table 3.2.

2130

2131 **Figure 9-figure supplement 5-source data 2: *wtf21* heterozygous diploid octad dissection**  
2132 **raw data.**

2133 *wtf21<sup>+</sup>/wtf21Δ* heterozygous diploid raw data files are shown as a pdf file with each cross in the  
2134 upper left of the images.

2135

2136 **Figure 9-figure supplement 5-source data 3: *wtf21* homozygous diploid octad dissection**  
2137 **raw data.**

2138 *wtf21Δ/wtf21Δ* homozygous diploid raw data files are shown as a pdf file with each cross in the  
2139 upper left of the images.

2140

2141 **Figure 9-figure supplement 6 Octad dissection analysis of *wtf62* heterozygous deletion**  
2142 **cross.**

2143 **(A)** Representative octads dissected from asci produced from a *wtf62* heterozygous deletion  
2144 cross. The labels A to H indicate the 8 spores dissected from each ascus and the labels 1 to 11  
2145 indicate the 11 asci analyzed. The genotypes of clones were determined by replica plating. Raw  
2146 data of all octads can be found in Figure 9-figure supplement 6-source data 2. **(B)** The  
2147 percentage of spores that were viable and with indicated genotypes in *wtf62<sup>+</sup>/wtf62Δ* cross. The  
2148 *P* value was calculated using exact binomial test and numerical data are provided in Figure 9-  
2149 figure supplement 6-source data 1. **(C)** Classification of octads derived from *wtf62<sup>+</sup>/wtf62Δ* cross  
2150 according to the number of viable spores with and without a *wtf* gene deletion. The *P* values  
2151 were calculated using the exact binomial test. The *P* values are only displayed if a pair of octad

2152 types have more than 5 octads in total, as  $P$  values cannot reach the significance threshold if  
2153 the total number of octads  $\leq 5$ .

2154

2155 **Figure 9-figure supplement 6-source data 1: Numerical data of the octad dissection**  
2156 **analysis of *wtf62* heterozygous deletion cross.**

2157 Raw data file with spore viability of *wtf62<sup>+</sup>/wtf62 $\Delta$*  heterozygous cross can be found in table 1.1.

2158 Corresponding octad genotypes are found in table 1.2. Spore viability data of homozygous

2159 diploid are in table 2. Exact binomial test was performed in table 3.1, and the Fisher's exact test

2160 is calculated in table 3.2.

2161

2162 **Figure 9-figure supplement 6-source data 2: *wtf62* heterozygous diploid octad dissection**  
2163 **raw data.**

2164 *wtf62<sup>+</sup>/wtf62 $\Delta$*  heterozygous diploid raw data files are shown as a pdf file with each cross in the  
2165 upper left of the images.

2166

2167 **Figure 9-figure supplement 6-source data 3: *wtf62* homozygous diploid octad dissection**  
2168 **raw data.**

2169 *wtf62 $\Delta$ /wtf62 $\Delta$*  homozygous diploid raw data files are shown as a pdf file with each cross in the  
2170 upper left of the images.

2171

2172 **Figure 10: *S. octosporus wtf25* is a poison-and-antidote killer meiotic driver.**

2173 **(A)** Schematic of the *wtf25* alleles integrated at the *leu1* (SOCG\_02003) locus. Black asterisks

2174 indicate start codon mutations. The start codon for the putative *wtf25<sup>poison</sup>* coding sequence is

2175 mutated in the *wtf25<sup>antidote-only</sup>* allele and the start codon for the putative *wtf25<sup>antidote</sup>* coding

2176 sequence is mutated in the *wtf25<sup>poison-only</sup>* allele. **(B)** The wild-type *wtf25* allele integrated at

2177 the *leu1* locus can act as a meiotic driver by killing spores not inheriting it in a heterozygous

2178 cross while *wtf25<sup>antidote-only</sup>* mutant allele integrated at the same locus was unable to kill spores  
2179 not inheriting it in a heterozygous cross. *P* value calculations using a binomial test of goodness-  
2180 of-fit are shown in Figure 10-source data 1 and 2. **(C)** The *wtf25<sup>poison-only</sup>* allele integrated at *leu1*  
2181 can cause self-killing in spores that do not inherit wild-type *wtf25* at the endogenous locus. The  
2182 effects of the *wtf25<sup>poison-only</sup>* allele were compared to a control cross in which an empty vector  
2183 was integrated at *leu1*. Numerical data are provided in Table S28 and the *P* value calculation is  
2184 shown in Figure 10-source data 3.

2185

2186 **Figure 10-source data 1: Raw data of the octad dissection analysis of *wtf25* integrated at**  
2187 ***leu1*.**

2188 Table 1 shows the viability of heterozygous diploid spores. Exact binomial test of goodness-of-fit  
2189 was calculated in Table 2, and the resulting *P* value is displayed in Figure 10B.

2190

2191 **Figure 10-source data 2: Raw data of the octad dissection analysis of *wtf25<sup>antidote-only</sup>***  
2192 **integrated at *leu1*.**

2193 Table 1 shows the viability of heterozygous diploid spores. Exact binomial test of goodness-of-fit  
2194 was calculated in Table 2, and the resulting *P* value is displayed in Figure 10B.

2195

2196 **Figure 10-source data 3: Raw data of the octad dissection analysis of *wtf25<sup>poison-only</sup>***  
2197 **integrated at *leu1*.**

2198 Empty plasmid control strain spore viability can be found in Table 1.1. *wtf25<sup>poison-only</sup>* octad  
2199 dissection spore viability results can be found in Table 1.2. The *P* value was calculated with a  
2200 Fisher's exact test in Table 2.

2201

2202 **Figure 11: Model for long-term persistence of *wtf* meiotic drivers.**

2203 The presence of dispersed repetitive elements like LTRs (yellow) or 5S rDNA (red) associated  
2204 with *wtf* genes (orange) may facilitate duplication of the genes to novel sites in the genome by  
2205 recombination mechanisms schematized in Figure 6. Non-allelic gene conversion and  
2206 expansion/contraction of repeat elements can also fuel the birth and rejuvenation of *wtf* meiotic  
2207 drivers allowing them to avoid fixation, suppression, mutational decay and, ultimately,  
2208 extinction.

2209

2210 **Table S1: Percent amino acid identity of all 1:1 orthologs in *Schizosaccharomyces*.**

2211 Orthologous gene sets between pairs of *Schizosaccharomyces* species were identified using a  
2212 combination of OrthoVenn2 and BLASTp (Xu et al., 2019). All proteins from a given species  
2213 were aligned the proteins of the other species and the best hit for each was used to determine  
2214 the amino acid identity. All the percent identity values between a pair of species were then used  
2215 to calculate the average amino acid identity between the two species. The genome used for  
2216 finding proteins sequences was generate by Rhind et al., 2011 for *S. octosporus*, *S. cryophilus*,  
2217 *S. pombe*, and *S. japonicus*. The *S. osmophilus* genome was sequenced and annotated in this  
2218 study (see methods). The orthologs list can be found in Figure 1-Source data 3.

2219

2220 **Table S2: Location and features of *S. octosporus wtf* genes.**

2221 *S. octosporus wtf* genes names are found in column A. The gene locations are described from  
2222 columns B to F. If the gene is associated with a *wag* gene, the *wag* gene name and orientation  
2223 are indicated in columns G and H. Column K indicates whether the *wtf* gene is associated with a  
2224 5S rDNA gene (immediately adjacent to the *wtf* or outside a flanking *wag* gene). The strand  
2225 location of 5S rDNA genes that may be found upstream of the *wtf* gene is described in column I,  
2226 while the strand location for 5S rDNA genes that may be downstream of the *wtf* gene is  
2227 described in column J. *wtf* genes and the associated 5S rDNA are considered to be in tandem  
2228 when they are encoded in the same strand and in the same direction. The *wtf* and *wag* genes

2229 are all in a divergent orientation in that they are on opposite strands and transcribed in opposite  
2230 directions. Column L details if there is a 5S rDNA upstream, downstream or if there is a 5S  
2231 rDNA gene both upstream and downstream the *wtf* gene. Column M describes our prediction if  
2232 the *wtf* gene encodes a driver (intact poison start codon), an antidote-only gene (no start codon  
2233 for poison) or is a pseudogene (premature stop codon). Columns N and O show the read counts  
2234 of the two isoforms detected with long read RNA-seq, respectively, with the long isoform  
2235 predicted to encode an antidote protein and the short isoform predicted to encode a poison  
2236 protein. Column P indicates if a FIMO motif scanning hit of the FLEX motif was present in intron  
2237 1 of the *wtf* gene. Column Q provides the location of the FIMO hit in intron 1 (only the best  
2238 scoring FIMO hit is shown if more than one hit was found). Column R shows the strand the  
2239 FIMO hit is on. Columns S and T show the *P* value of the FIMO hit and the sequence of the  
2240 FIMO hit, respectively.

2241

2242 **Table S3: Location and features of *S. osmophilus wtf* genes.**

2243 *S. osmophilus wtf* genes names are found in column A. The gene locations are described from  
2244 columns B to F. If the gene is associated with a *wag* gene, the *wag* gene name and orientation  
2245 are indicated in columns G and H. Column K indicates whether the *wtf* gene is associated with a  
2246 5S rDNA gene (immediately adjacent to the *wtf* or outside a flanking *wag* gene). The strand  
2247 location of 5S rDNA genes that may be found upstream of the *wtf* gene is described in column I,  
2248 while the strand location for 5S rDNA genes that may be downstream of the *wtf* gene is  
2249 described in column J. *wtf* genes and the associated 5S rDNA are in tandem when they are  
2250 encoded in the same strand and in the same direction. Column L details if there is a 5S rDNA  
2251 upstream, downstream or if there is a 5S rDNA gene both upstream and downstream the *wtf*  
2252 gene. Column M describes our prediction if the *wtf* gene encodes a driver (intact poison start  
2253 codon), an antidote-only gene (no start codon for poison) or is a pseudogene (premature stop  
2254 codon). Columns N and O indicated the strand of the LTR and orientation relative to the *wtf*

2255 gene. As above, tandem orientation means same orientation and same strand, convergent  
2256 means the elements are on opposite strands but are transcribed toward each other. Divergent  
2257 means that the elements are in different strands and are transcribed in opposite directions.  
2258 Column P indicates if a FIMO motif scanning hit of the FLEX motif was present in intron 1 of the  
2259 *wtf* gene. Column Q provides the location of the FIMO hit in intron 1 (only the best scoring FIMO  
2260 hit is shown if more than one hit was found). Column R shows the strand the FIMO hit is on.  
2261 Columns S and T show the *P* value of the FIMO hit and the sequence of the FIMO hit,  
2262 respectively.

2263

2264 **Table S4: Location and features of *S. cryophilus wtf* genes.**

2265 *S. cryophilus wtf* genes names are found in column A. The gene locations are described from  
2266 columns B to F. If the gene is associated with a *wag* gene, the *wag* gene name and orientation  
2267 are indicated in columns G and H. Column K indicates whether the *wtf* gene is associated with a  
2268 5S rDNA gene (immediately adjacent to the *wtf* or outside a flanking *wag* gene). The strand  
2269 location of 5S rDNA genes that may be found upstream of the *wtf* gene is described in column I,  
2270 while the strand location for 5S rDNA genes that may be downstream of the *wtf* gene is  
2271 described in column J. *wtf* genes and the associated 5S rDNA are in tandem (column L) when  
2272 they are encoded in the same strand and in the same direction. Column L details if there is a 5S  
2273 rDNA upstream, downstream or if there is a 5S rDNA gene both upstream and downstream the  
2274 *wtf* gene. Column M describes our prediction if the *wtf* gene encodes a driver (intact poison  
2275 start codon), an antidote-only gene (no start codon for poison) or is a pseudogene (premature  
2276 stop codon). Column N indicates if a FIMO motif scanning hit of the FLEX motif was present in  
2277 intron 1 of the *wtf* gene. Column O provides the location of the FIMO hit in intron 1 (only the best  
2278 scoring FIMO hit is shown if more than one hit was found). Column P shows the strand the  
2279 FIMO hit is on. Columns Q and R show the *P* value of the FIMO hit and the sequence of the  
2280 FIMO hit, respectively.

2281

2282 **Table S5: Pairwise amino acid identity of intact *wtf* genes.**

2283 Using MAFFT with parameters L-INS-I (200PAM scoring matrix/k=2; Gap open penalty of 2;  
2284 offset of 0.123), we aligned all the predicted coding sequences of the intact *wtf* genes from *S.*  
2285 *octosporus*, *S. osmophilus*, *S. cryophilus* and *S. pombe*. The longest isoform (i.e. antidote) of  
2286 each protein, when two isoforms are predicted, was used. The table shows the percent amino  
2287 acid identity shared between all pairs of genes. The cells are color-coded such that pairs with  
2288 higher similarity are shaded a darker red.

2289

2290 **Table S6: Genes used for FLEX motif discovery.**

2291 This table lists the 49 *S. pombe* Mei4 target genes and their orthologs in three other fission  
2292 yeast species used for FLEX motif discovery.

2293

2294 **Table S7: Summary statistics of genome-wide FLEX motif scanning.**

2295 FIMO hits were classified into unreliable hits and confident hits using the *P* value cutoff of 3E-6.  
2296 This table lists the numbers of total FIMO hits, unreliable hits and confident hits in each species.

2297

2298 **Table S8: Confident hits of FLEX motif scanning.**

2299 This table lists the confident FIMO hits in the four fission yeast species.

2300

2301 **Table S9: Locations of LTR sequences in *S. osmophilus*.**

2302 We used BLASTn with *S. cryophilus* LTR sequences as queries to identify *S. osmophilus* LTRs.  
2303 In addition, we also used as LTR\_retriever (see Methods). The table reports the location, length,  
2304 and orientation of each LTR identified.

2305



2306 **Table S10: Summary of association between 5S rDNA and *wtf* genes within**  
2307 ***Schizosaccharomyces* genomes.**

2308 The table lists the number of 5S rDNA genes in each species and details how many of those 5S  
2309 rDNA genes are associated with a locus that contains one or more *wtf* genes. Additional  
2310 unannotated 5S rDNA genes were identified within the *S. octosporus* and *S. cryophilus*  
2311 genomes using BLASTn. In *S. osmophilus*, all 5S rDNA genes were identified by BLASTn. A  
2312 gene was considered a *bona fide* 5S rDNA gene if it shared more than 70% sequence identity  
2313 with another 5S rDNA gene in that genome. A 5S rDNA was considered associated with a *wtf*  
2314 locus if it was immediately adjacent to a *wtf* gene, or if it was adjacent to a *wag* gene flanking a  
2315 *wtf* gene.

2316

2317 **Table S11: *wag* gene transcripts in *S. octosporus*.**

2318 Annotation of *wag* genes of *S. octosporus* with the corresponding SOCG names, where  
2319 applicable, in column B. Genes with early stop codons relative to consensus sequences are  
2320 considered pseudogenes (column H).

2321

2322 **Table S12: Synteny analysis of the regions containing *wtf* genes in *S. pombe* (i.e. Figure**  
2323 **4 and Figure 4-figure supplement 1).**

2324 For each *S. pombe* *wtf* locus (from the *S. kambucha* isolate; column A), we noted the genes  
2325 directly upstream and downstream excluding *wag* genes (columns H and I). We next found the  
2326 orthologs of those *wtf*-flanking genes in *S. osmophilus* (columns J and K), *S. octosporus*  
2327 (columns L and M), and *S. cryophilus* (columns N and O). If the orthologs of the genes that flank  
2328 a *wtf* in *S. pombe* also flank a single *wtf* locus in another species, the *wtf* genes were  
2329 considered to share 'complete' synteny. If the orthologs both flank *wtf* genes, but not the same  
2330 *wtf* gene in a different species, we dubbed this scenario 'double partial synteny.' If only one of  
2331 the two orthologs flank a *wtf* gene in another species, we considered that 'partial synteny.' The

2332 synteny analyses results for *S. cryophilus*, *S. octosporus* and *S. osmophilus* are reported in  
2333 columns B-C, D-E, and F-G, respectively.

2334

2335 **Table S13: *S. cryophilus wtf* genes in synteny with *S. octosporus*, *S. osmophilus*, and *S.***  
2336 ***pombe wtf* genes (Figure 4-supplement figure 1).**

2337 For each *S. cryophilus wtf* gene (column A), we noted the genes directly upstream and  
2338 downstream, excluding *wag* genes (columns H and I). We next found the orthologs of those *wtf*-  
2339 flanking genes in *S. octosporus* (columns J and K), *S. pombe* (columns L and M), and *S.*  
2340 *osmophilus* (columns N and O). If the orthologs both flank *wtf* genes, but not the same *wtf* gene  
2341 in a different species, we dubbed this scenario ‘double partial synteny.’ If only one of the two  
2342 orthologs flank a *wtf* gene in another species, we considered that ‘partial synteny.’ The synteny  
2343 analyses results for *S. octosporus*, *S. pombe*, and *S. osmophilus* are reported in columns B-C,  
2344 D-E, and F-G, respectively.

2345

2346 **Table S14: Percent amino acid identity of genes flanking *wtf* genes at syntenic loci (i.e.**  
2347 **Figure 4 and Figure 4-figure supplement 1).**

2348 The amino acid sequences of genes flanking the *S. pombe wtf* loci shown in Figure 4 (*wtf34*)  
2349 and Figure 4 -figure supplement 1 (*wtf6*) were aligned with their orthologs from all other  
2350 *Schizosaccharomyces* species using MAFFT L-INS-I (200PAM scoring matrix/k=2; Gap open  
2351 penalty of 2; offset of 0.123). The tables depict the pairwise percent amino acid identity between  
2352 all ortholog pairs. Comparisons between the genes flanking *S. pombe wtf34* (*clr4* and *met17*)  
2353 are shown at the top while the comparisons between the genes flanking *S. pombe wtf6* (*ago1*  
2354 and *cyp9*) are shown below.

2355

2356 **Table S15: Species-specific *wtf* genes.**

2357 Summary of the species-specific *wtf* loci and genes found in each species. The *S. kambucha*  
2358 isolate of *S. pombe* was used for this table and the reference genomes were used for the other  
2359 species. The gene names of the species-specific *wtf* genes are shown in the final column.  
2360 Genes found at separate loci are separated by commas and genes found at a centromere are  
2361 shown in bold.

2362

2363 **Table S16: Analyzing if 5S rDNA genes are found at loci syntenic to 5S rDNA-adjacent *S.***  
2364 ***osmophilus wtf* genes in other species (i.e. Figure 6).**

2365 For each *S. osmophilus wtf* locus (column A), we noted the genes directly upstream and  
2366 downstream (columns D and E) excluding any *wag* genes. We next found the orthologs of those  
2367 *wtf*-flanking genes in *S. octosporus* (columns F and G), and *S. cryophilus* (columns H and I).  
2368 The synteny analyses results comparing *S. osmophilus wtf* loci to *S. octosporus* are shown in  
2369 columns B and C. If the orthologs of the genes that flank a *wtf* in *S. osmophilus* also flank a  
2370 single *wtf* locus in the queried species, the *wtf* genes were considered to share 'complete'  
2371 synteny. If the orthologs both flank a *wtf* locus, but not the same *wtf* locus in the queried  
2372 species, we dubbed this scenario 'double partial synteny.' If only one of the two orthologs flank  
2373 a *wtf* gene in the queried species, we considered that 'partial synteny.' For the analysis, we  
2374 considered loci in complete synteny where there was a *wtf* gene flanked by a 5S rDNA gene in  
2375 *S. osmophilus* (column J), but no *wtf* gene at the syntenic locus in the queried species (columns  
2376 K and M, respectively). We evaluated if the *wtf*-lacking syntenic locus in *S. octosporus* or *S.*  
2377 *cryophilus* contained a 5S rDNA gene (columns L and N, respectively). The loci that met our  
2378 criteria and were considered in the analysis are listed in columns O and P for *S. octosporus* and  
2379 *S. cryophilus*, respectively. In column Q we considered each locus to be a lineage specific locus  
2380 meaning no synteny found in other species.

2381

2382 **Table S17: Analyzing if 5S rDNA genes are found at loci syntenic to 5S rDNA-adjacent *S.***  
2383 ***octosporus wtf* genes in other species (i.e. Figure 6).**

2384 For each *S. octosporus wtf* locus (column A), we noted the genes directly upstream and  
2385 downstream (columns D and E) excluding any *wag* genes. We next found the orthologs of those  
2386 *wtf*-flanking genes in *S. osmophilus* (columns F and G), and *S. cryophilus* (columns H and I).  
2387 The synteny analyses results comparing *S. octosporus wtf* loci to *S. osmophilus* are shown in  
2388 columns B and C. If the orthologs of the genes that flank a *wtf* in *S. octosporus* also flank a  
2389 single *wtf* locus in the queried species, the *wtf* genes were considered to share ‘complete’  
2390 synteny. If the orthologs both flank a *wtf* locus, but not the same *wtf* locus in the queried  
2391 species, we dubbed this scenario ‘double partial synteny.’ If only one of the two orthologs flank  
2392 a *wtf* gene in the queried species, we considered that ‘partial synteny.’ For the analysis, we  
2393 considered loci in complete synteny where there was a *wtf* gene flanked by a 5S rDNA gene in  
2394 *S. octosporus* (column J), but no *wtf* gene at the syntenic locus in the queried species (columns  
2395 K and M, respectively). We evaluated if the *wtf*-lacking syntenic locus in *S. osmophilus* or *S.*  
2396 *cryophilus* contained a 5S rDNA gene (columns L and N, respectively). The loci that met our  
2397 criteria and were considered in the analysis are listed in columns O and P for *S. osmophilus* and  
2398 *S. cryophilus*, respectively. In column Q we considered each locus to be a lineage specific locus  
2399 meaning no synteny found in other species.

2400

2401 **Table S18: Repeat count within exon 4 in *S. octosporus* and *S. osmophilus wtf* genes (i.e.**  
2402 **Figure 5-supplement figure 2).**

2403 This tab contains 4 tables. From left to right, the first table displays the size, in base pairs of the  
2404 repeat region found in each intact *S. octosporus wtf* genes. These sizes were determined  
2405 manually in each gene. The next table summarizes how many *S. octosporus wtf* genes were

2406 found with repeat regions of the indicated ranges. The following two tables repeat the analyses  
2407 with the *S. osmophilus wtf* genes.

2408

2409 **Table S19: Expanded analysis of *wtf*+5S rDNA loci in species A with 5S rDNA at the locus**  
2410 **in species B (i.e. Figure 6).**

2411 Expanded table of data presented in Figure 6. The analysis considers *wtf*+5S rDNA loci that are  
2412 present in species A that are not found in species B. The total number of such sites, in addition  
2413 to how many of the sites have a 5S rDNA gene at the syntenic site in species B is reported. The  
2414 *wtf* genes considered are shown in the last column. Those with a 5S rDNA gene at the syntenic  
2415 site in species B are shown in bold. Genes found at separate loci are separated by commas.

2416

2417 **Table S20: Total viability numerical data summary.**

2418

2419 **Table S21: *wtf25*(SOCG\_04480) deletion related numerical data of the octad dissection**  
2420 **analysis.**

2421

2422 **Table S22: *wtf68*(SOCG\_01240) deletion related numerical data of the octad dissection**  
2423 **analysis.**

2424

2425 **Table S23: *wtf33* deletion related numerical data of the octad dissection analysis.**

2426

2427 **Table S24: *wtf46*(SOCG\_00084) deletion related numerical data of the octad dissection**  
2428 **analysis.**

2429 **Table S25: *wtf60*(SOCG\_04742) deletion related numerical data of the octad dissection**  
2430 **analysis.**

2431

2432 **Table S26: *wtf62*(SOCG\_04077) deletion related numerical data of the octad dissection**  
2433 **analysis.**

2434

2435 **Table S27: *wtf21*(SOCG\_02322) deletion related numerical data of the octad dissection**  
2436 **analysis.**

2437

2438 **Table S28: octo-pSIV-leu1-1D plasmid related numerical data of the octad spore**  
2439 **dissection analysis.**

2440

2441 **Table S29: Yeast strain summary.**

2442

2443 **Table S30: Oligos summary.**

2444

2445 **Table S31: Plasmids summary.**

2446

**Figure 1:** *wtf* homologs are found outside of *S. pombe*.

**A**

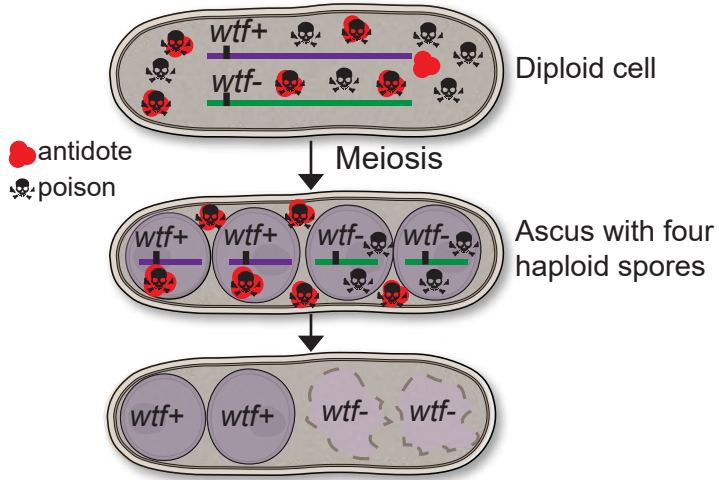

**B**

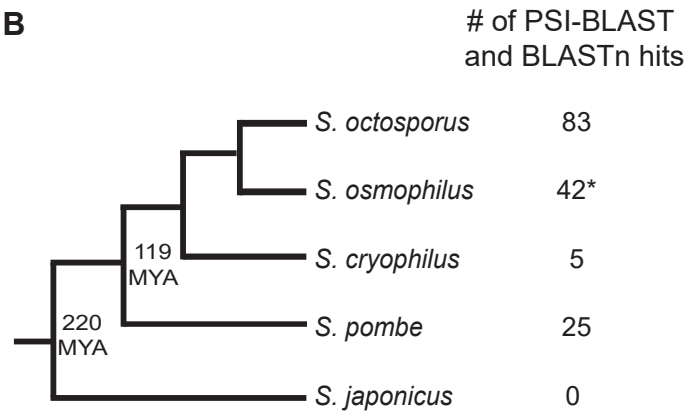



**Figure 1-figure supplement 1: Maps of the *wtf* gene family members in *S. octosporus*, *S. osmophilus*, *S. cryophilus* and *S. pombe*.**

**A *S. octosporus***

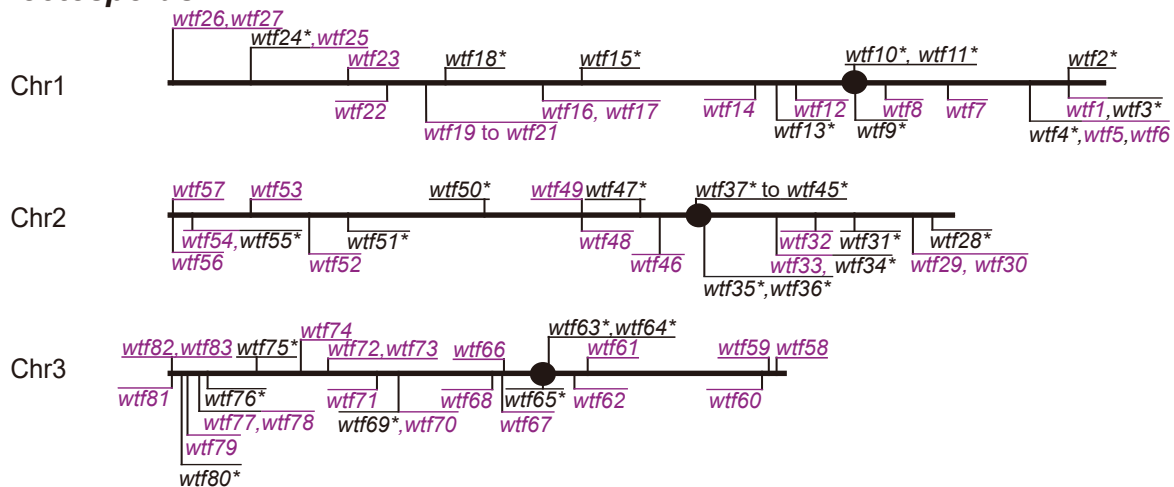

**B *S. osmophilus***

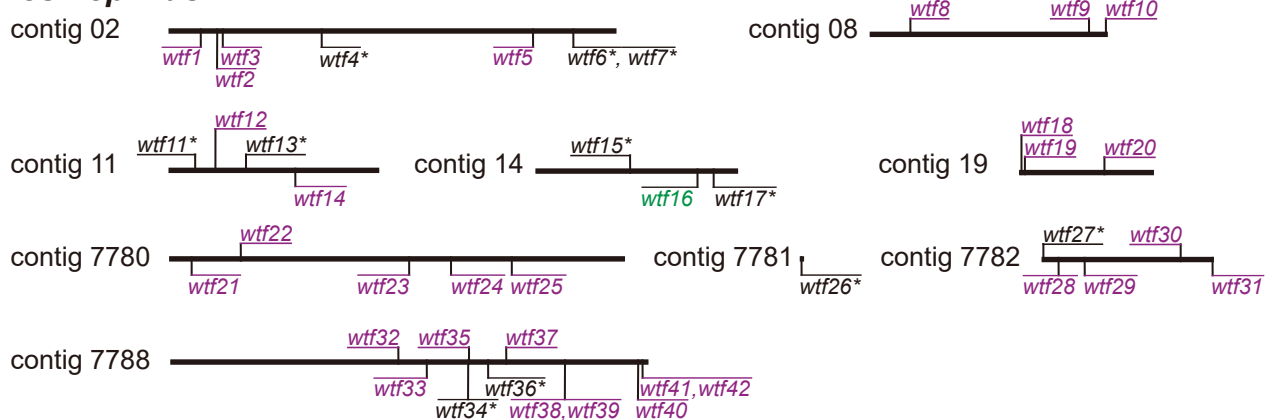

**C *S. cryophilus***

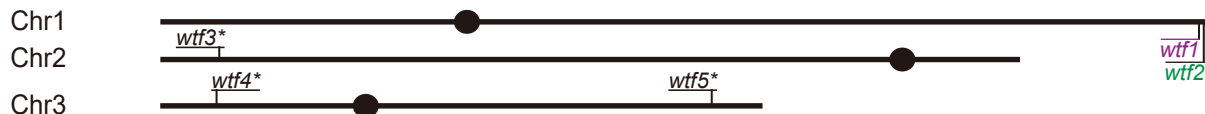

**D *S. pombe***

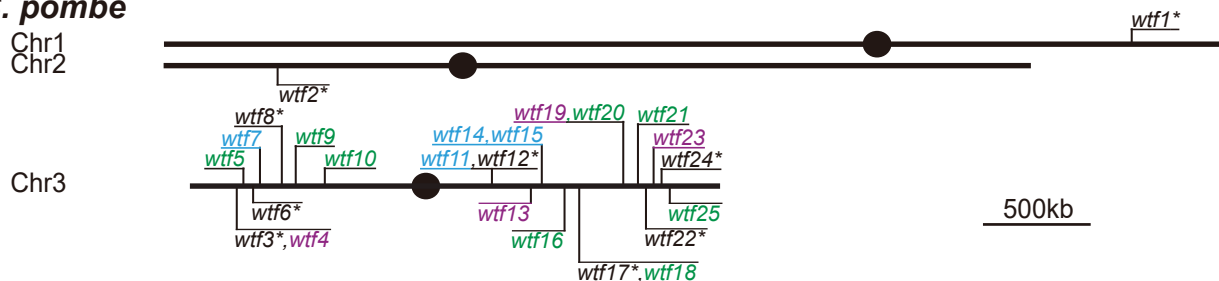

500kb

**Figure 2:** *S. pombe* *wtf* genes share features with other *wtf* genes outside of *S. pombe*.

**A**

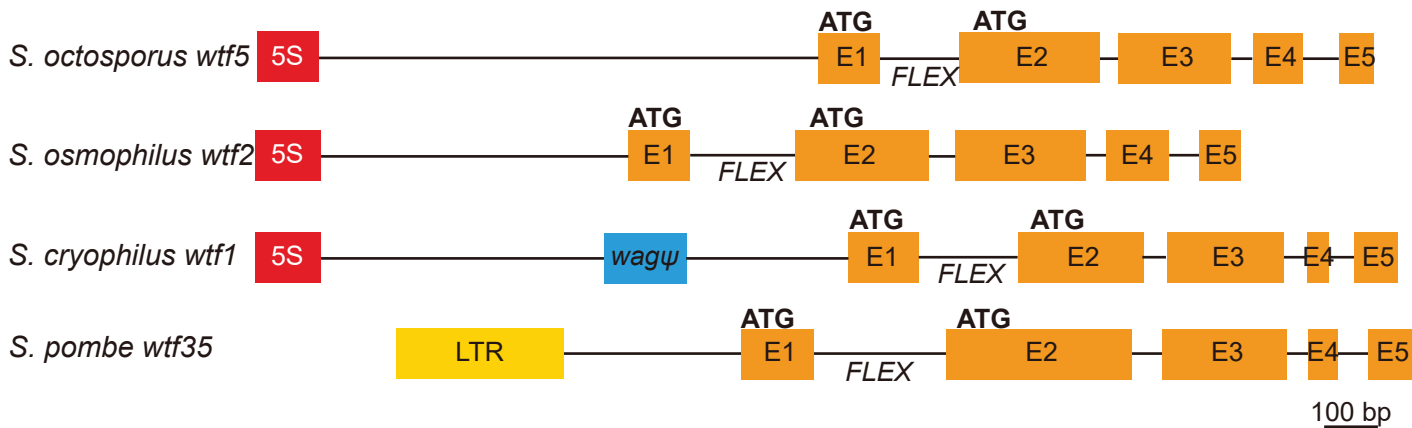

**B**

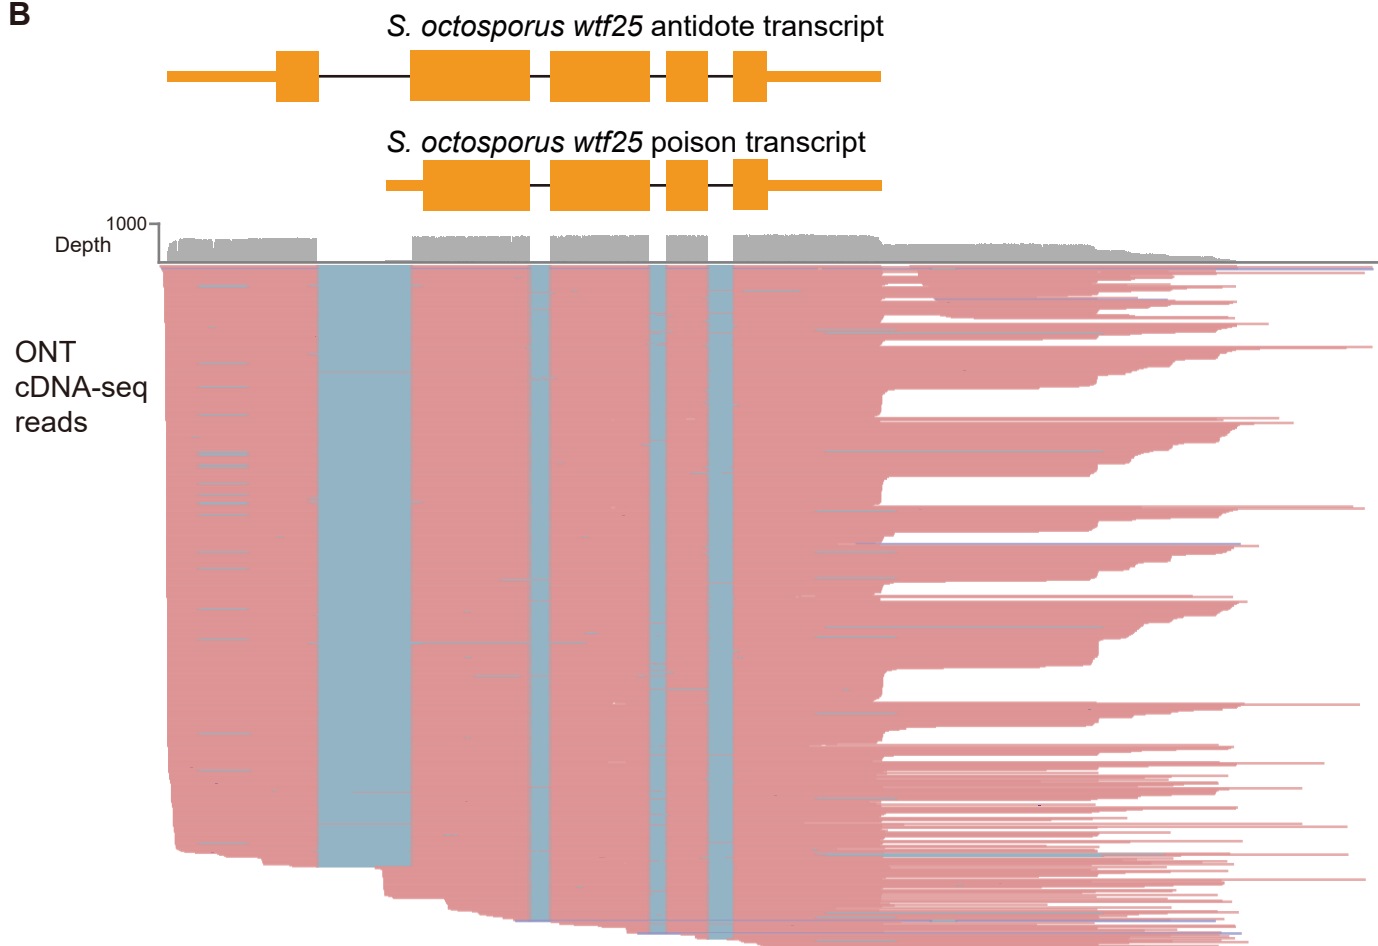

**Figure 2-figure supplement 1: Limited conservation of Wtf proteins.**

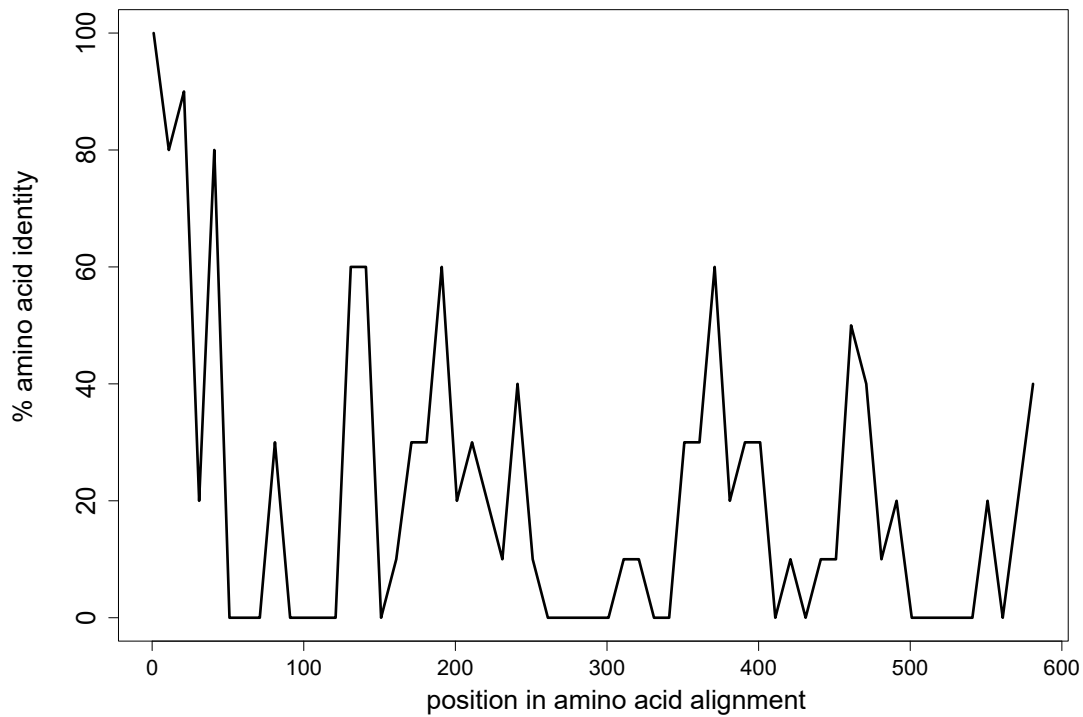

**Figure 2-figure supplement 2: Many *wtf* genes in *S. octosporus* harbor the FLEX motif in intron 1**

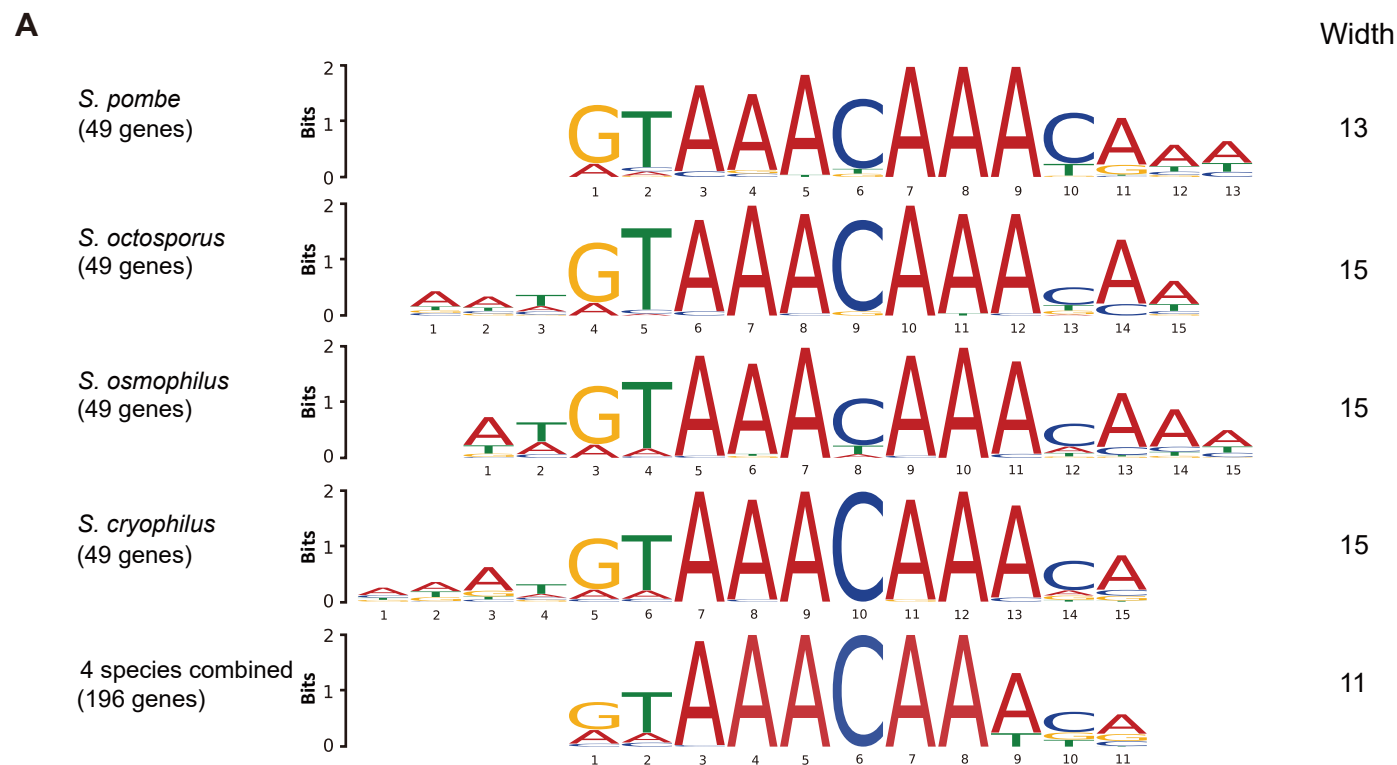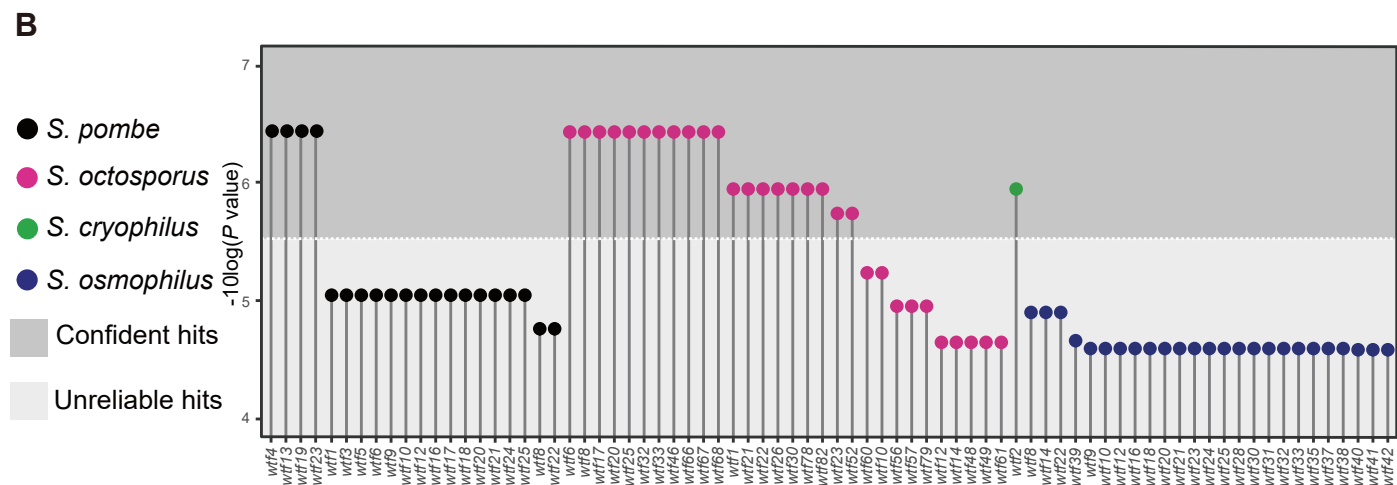

**Figure 2-figure supplement 3:** Transcription levels of predicted poison and antidote isoforms of intact *wtf* genes in *S. octosporus*.

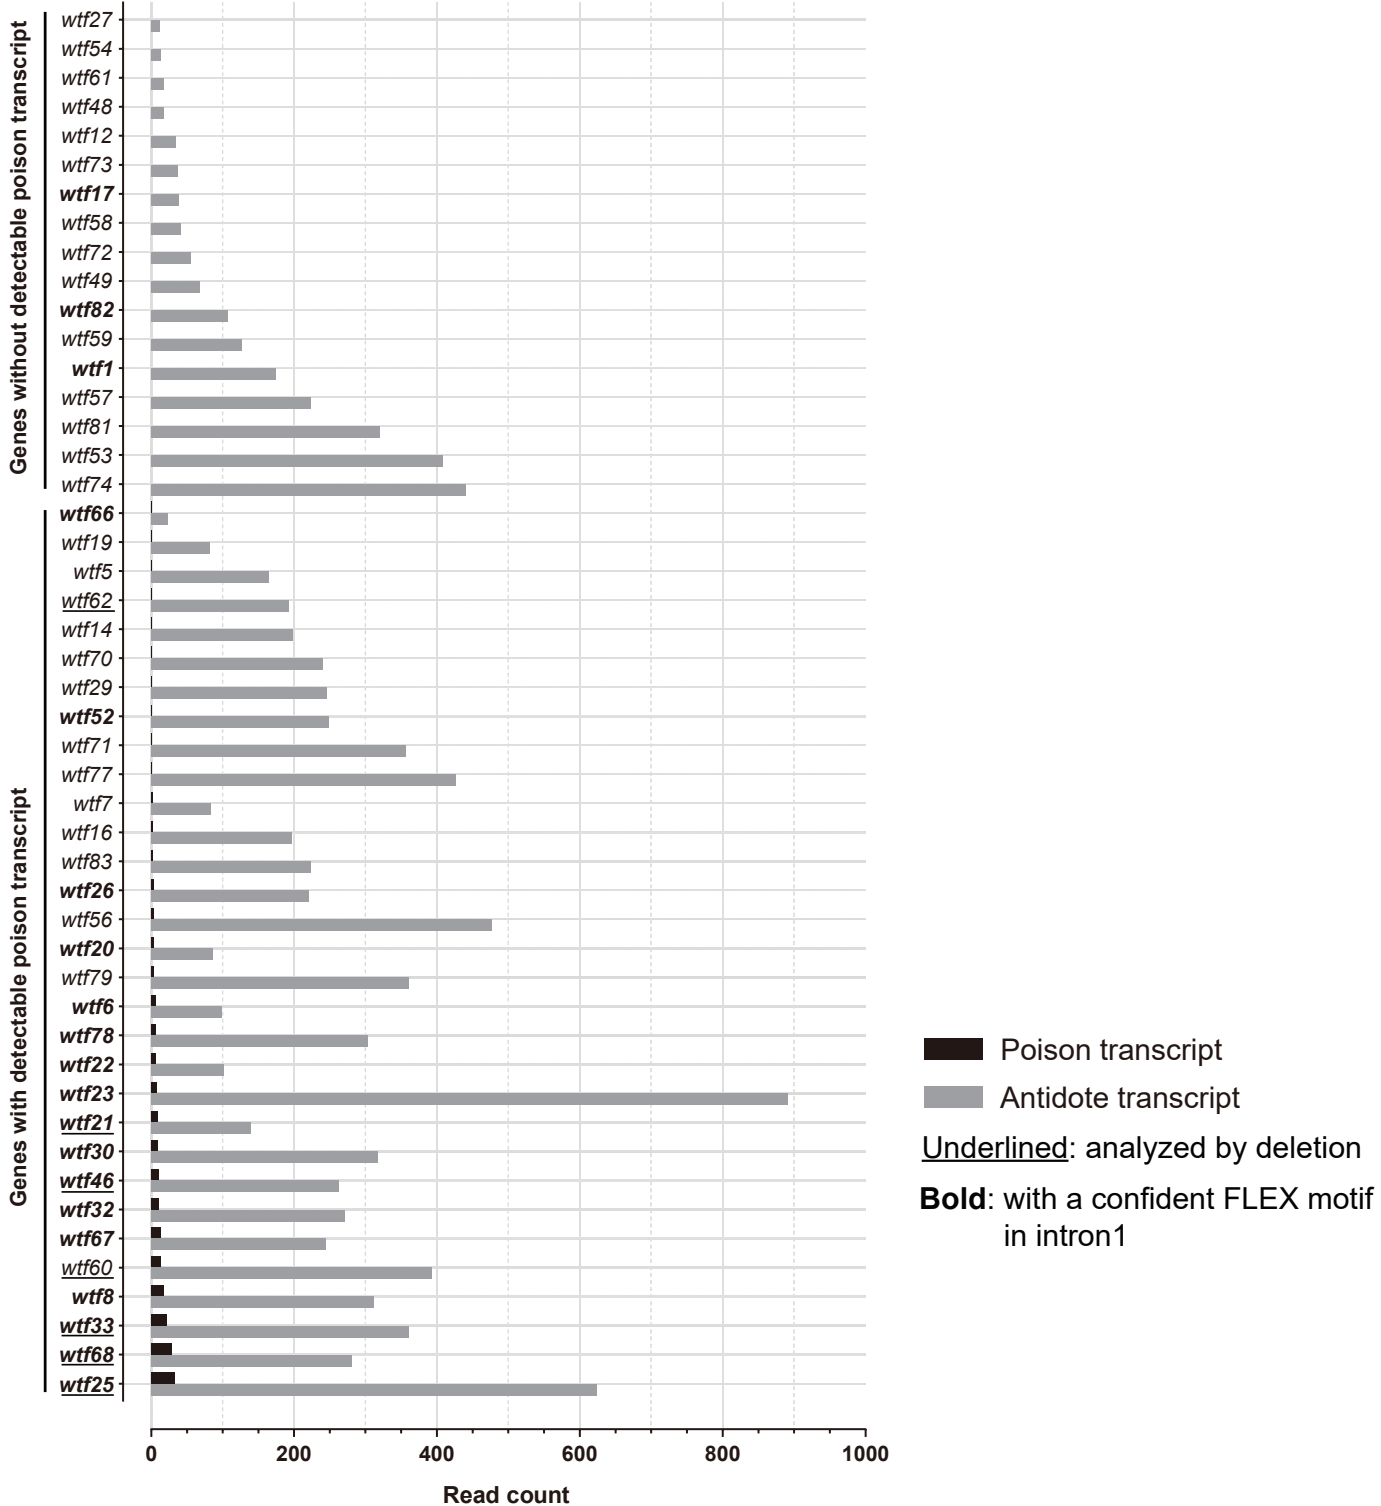

**Figure 3:** Genomic context of *wtf* genes.

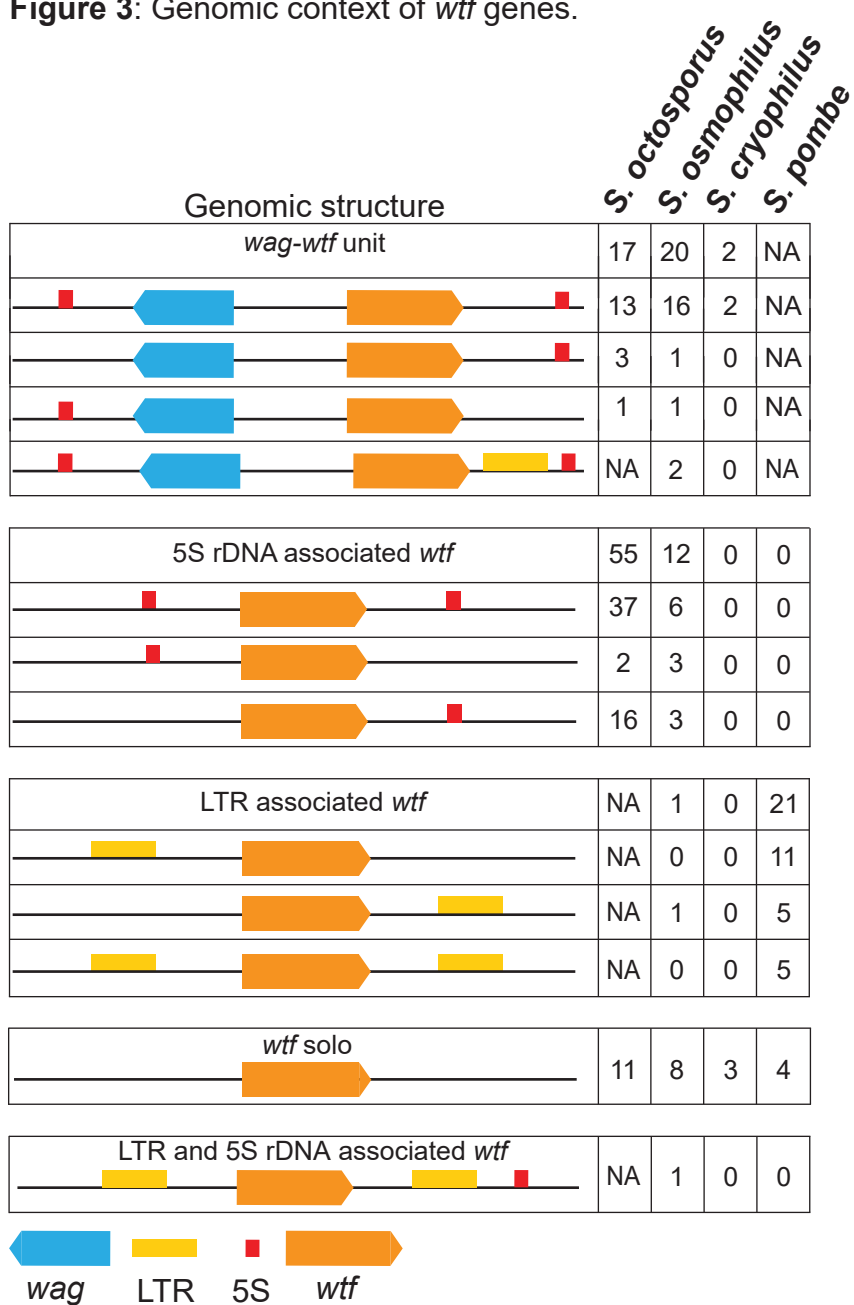

**Figure 3-figure supplement 1: Distance between 5S rDNA and *wtf* genes**

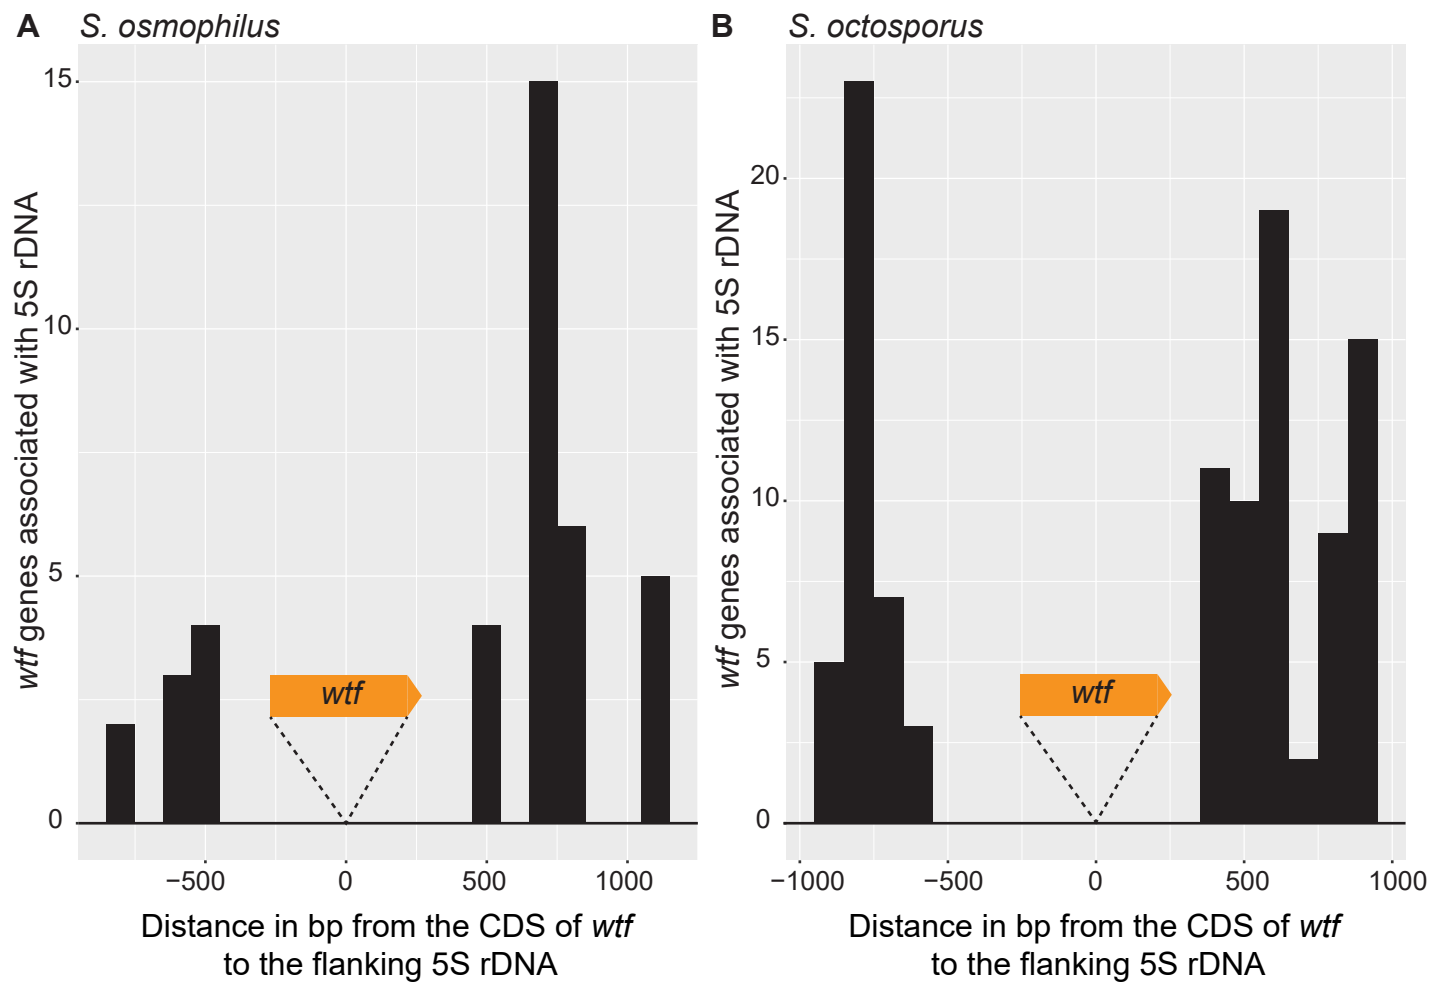



**Figure 3-figure supplement 2: Homology between distinct 5S rDNA-*wtf* and *wag-wtf* units**

**A**

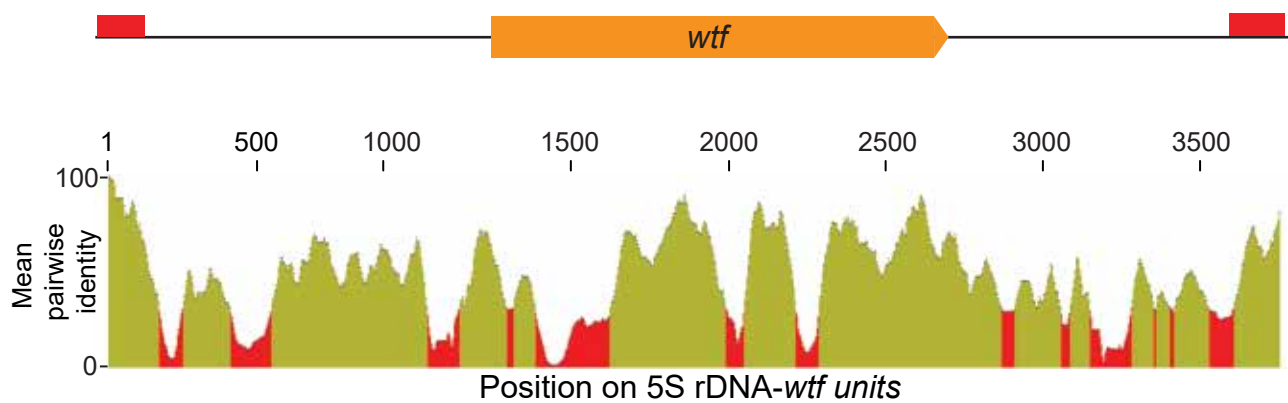

**B**

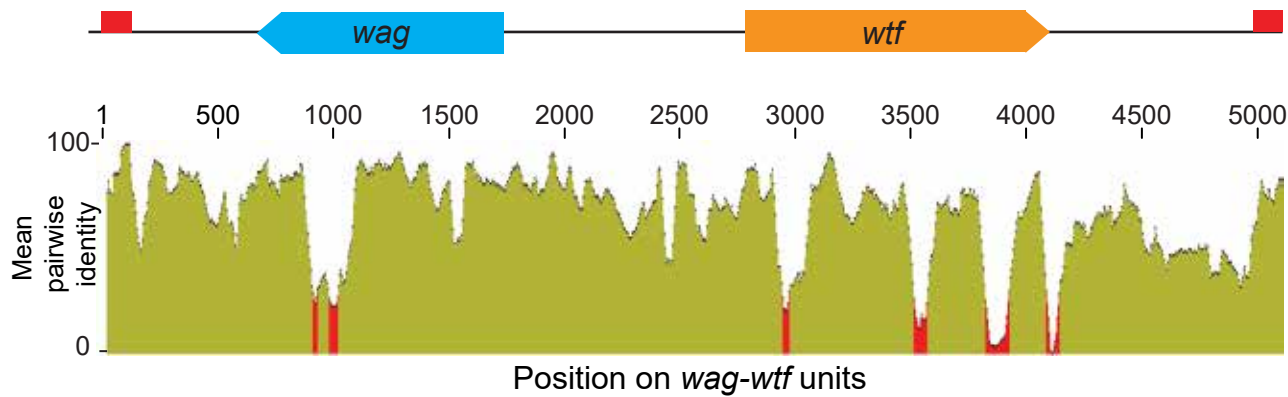

**Figure 3-figure supplement 3: *S. octosporus* wtf gene units supported by maximum likelihood phylogeny.**

**A 5S rDNA-wtf units**

*wtf*13,14,15,32,34,62

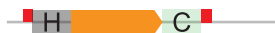

*wtf*12,33,67,68

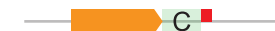

*wtf*70

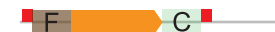

*wtf*73

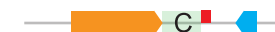

*wtf*7,22,30,46

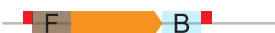

*wtf*8,47,49

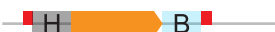

*wtf*21,23,50,52,66,71,74

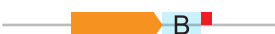

*wtf*1,26,78,82

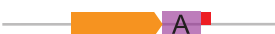

*wtf*59,72

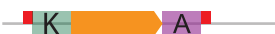

*wtf*2,58

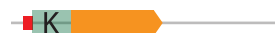

*wtf*48

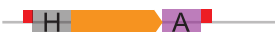

*wtf*9,10,11,35,36,37,38,39,40

*wtf*41,42,43,44,45,63,64,65

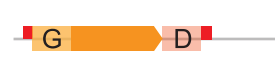

Grouped units supported by Maximum likelihood and identity from figure 3-supplement 5 to 6

downstream 5S rDNA-wtf

A B C D E

upstream 5S rDNA-wtf

F G H K

intergenic wag-wtf unit

I

upstream wag-wtf unit

J

wag 5S wtf

**B wag-wtf units**

*wtf*4[wag1]

*wtf*5 *wtf*6[wag2]

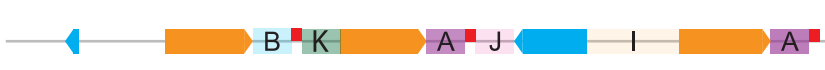

*wtf*16[wag3] *wtf*17

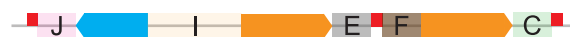

*wtf*19[wag4] *wtf*20

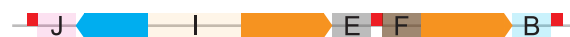

*wtf*53[wag9] *wag*10

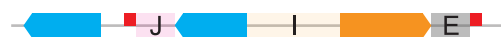

*wtf*29[wag8], *wtf*56[wag12], *wtf*69[wag15],  
*wtf*77[wag17], *wtf*79[wag18], *wtf*81[wag20]

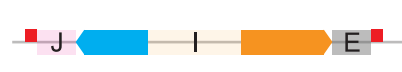

*wtf*83[wag21], *wtf*27[wag7], *wtf*24[wag5]

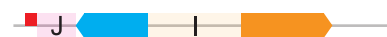

*wtf*61[wag14]

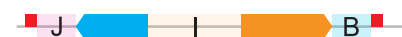

*wtf*57[wag13]

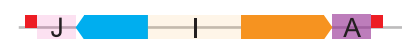

*wtf*54[wag11] *wtf*55

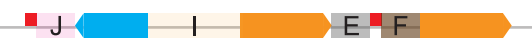

**Figure 3-figure supplement 4:** Maximum likelihood phylogeny of the regions between *S. octosporus* wtf genes and a downstream flanking 5S rDNA gene.

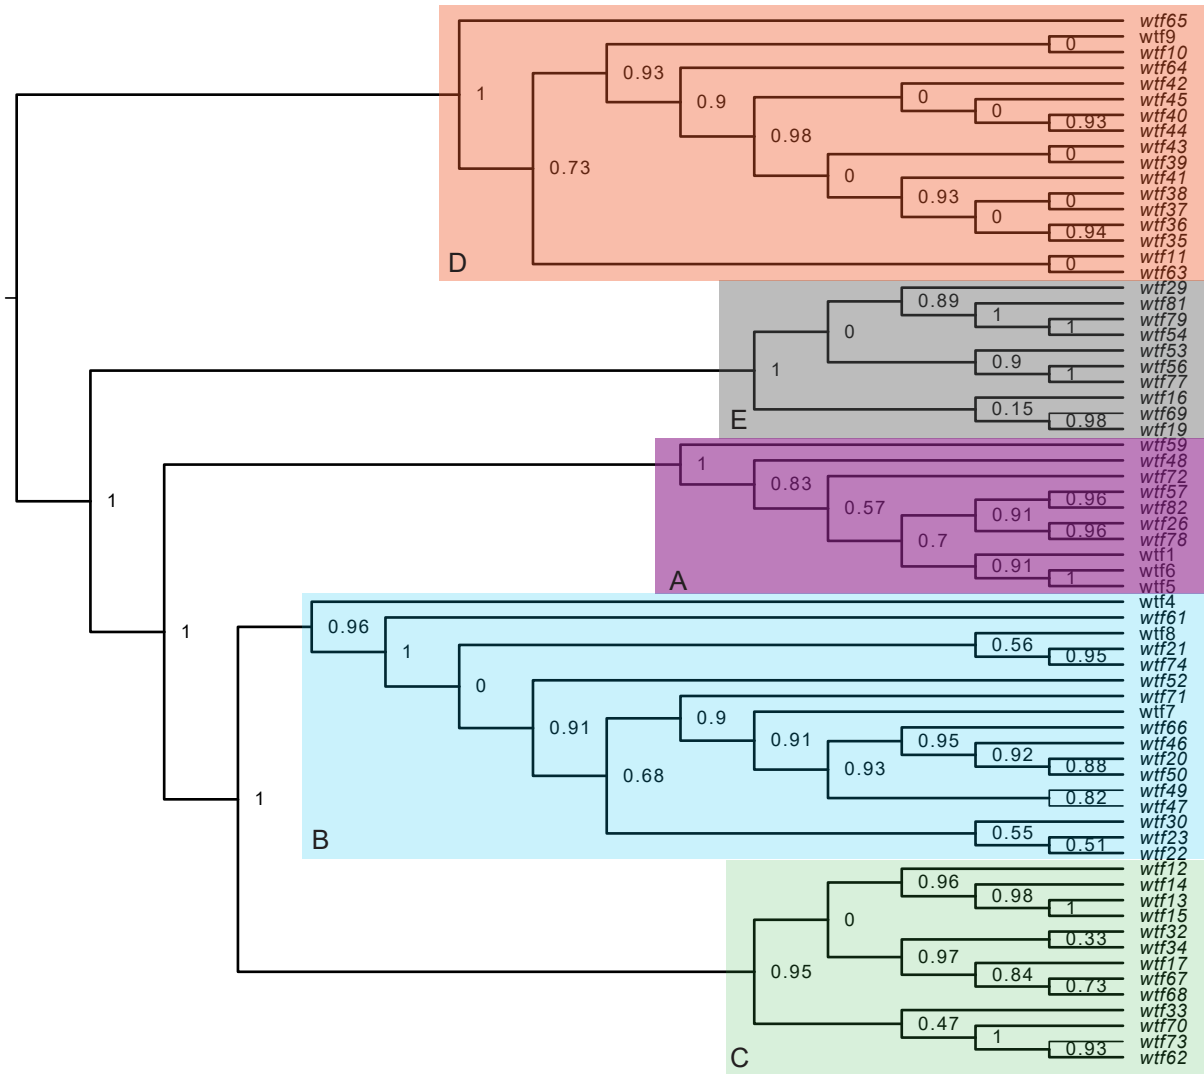



**Figure 3-figure supplement 6:** Maximum Likelihood phylogeny of *S. octosporus wtf* genes

flanking homology non-coding sequence groups from figure 3-supplement 3

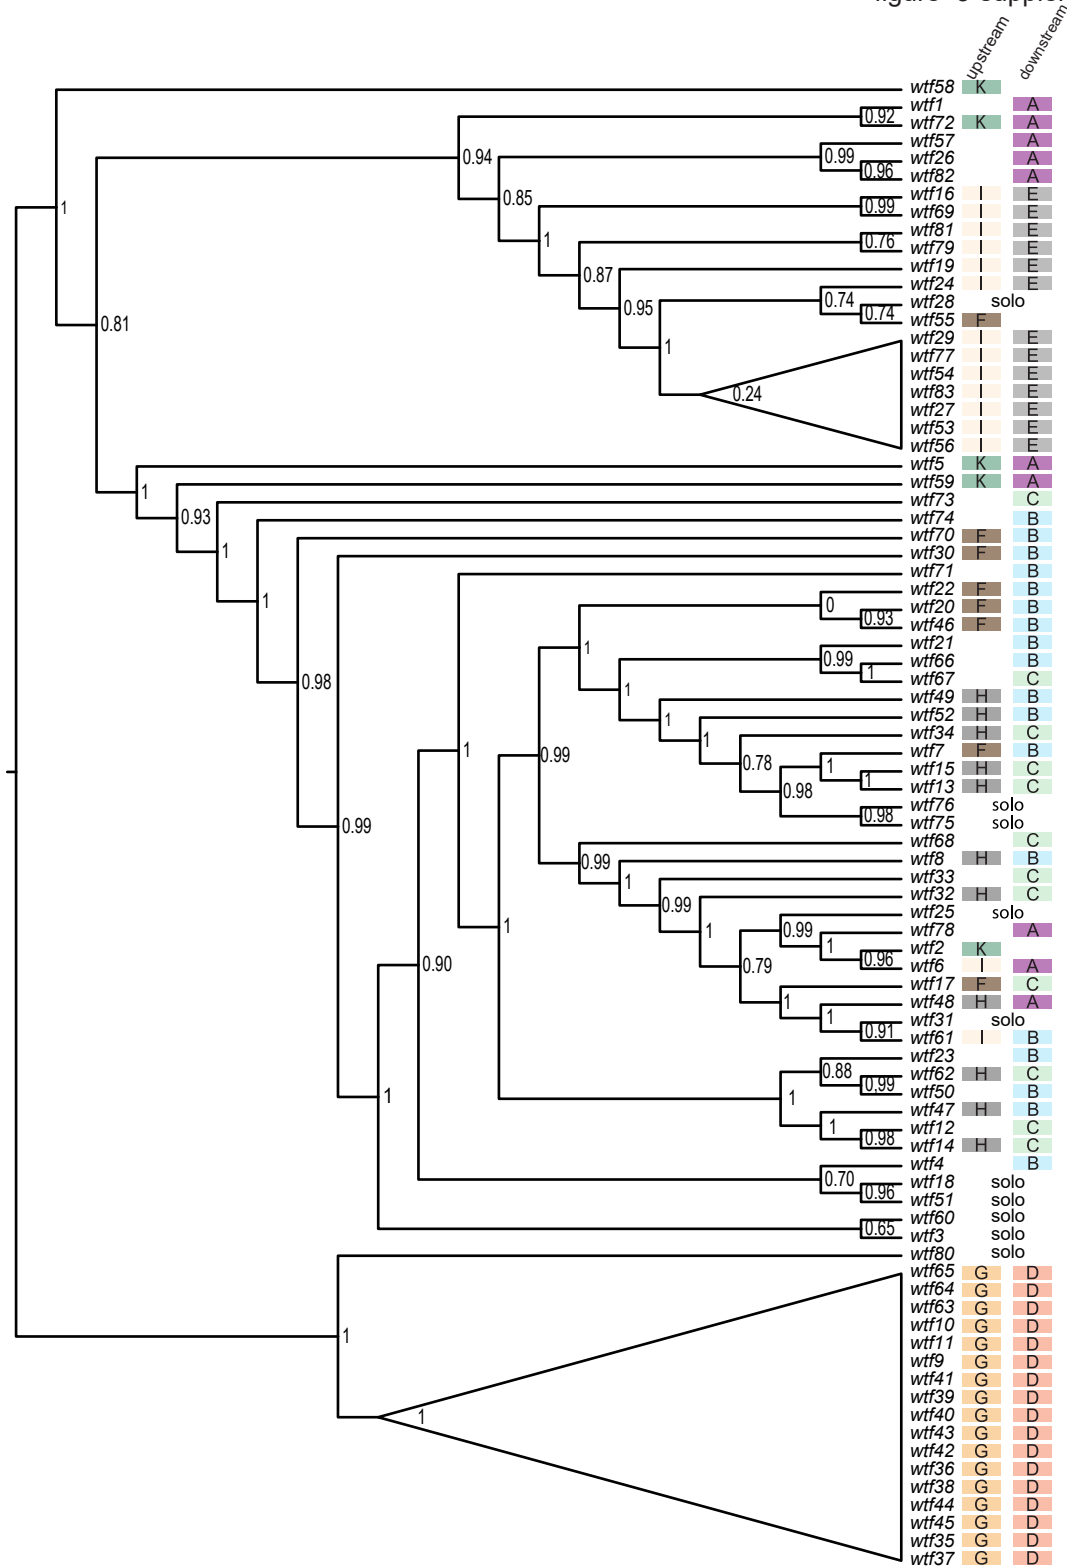

**Figure 4: Shared *wtf* locus in three fission yeast species.**

**A**

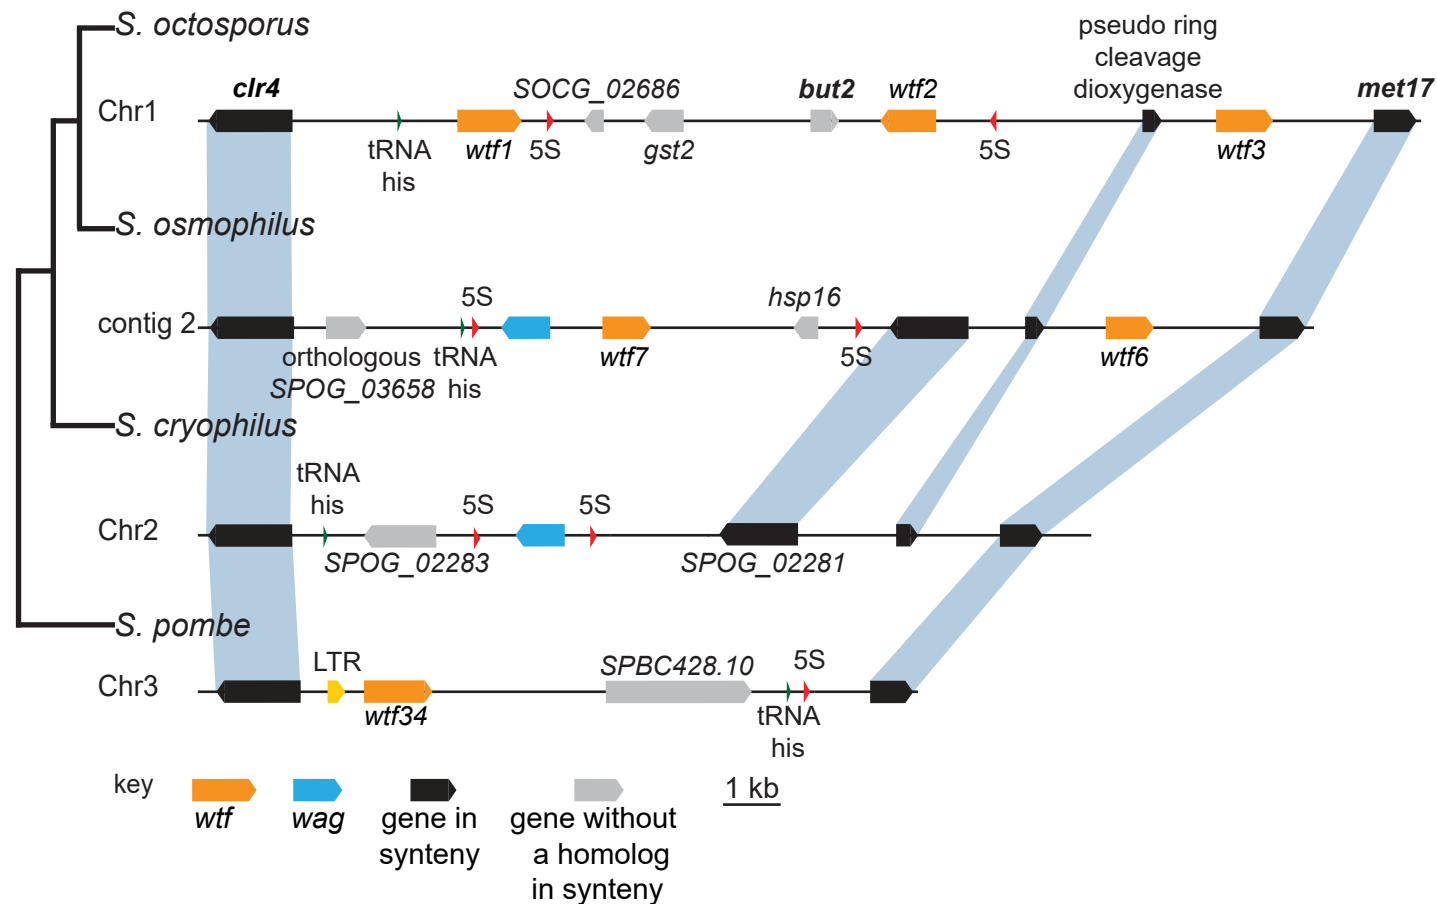

**B**

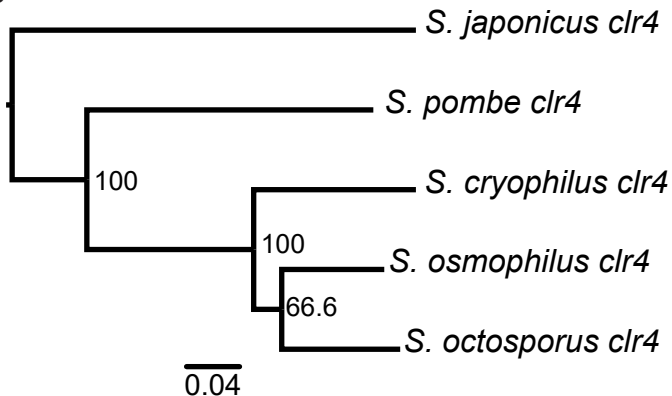

**C**

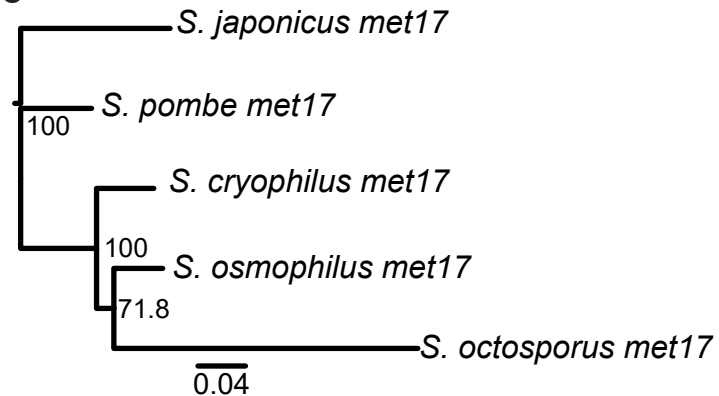

**Figure 4-figure supplement 1: Synteny between *S. cryophilus* *wtf4* and *S. pombe* *wtf6*.**

**A**

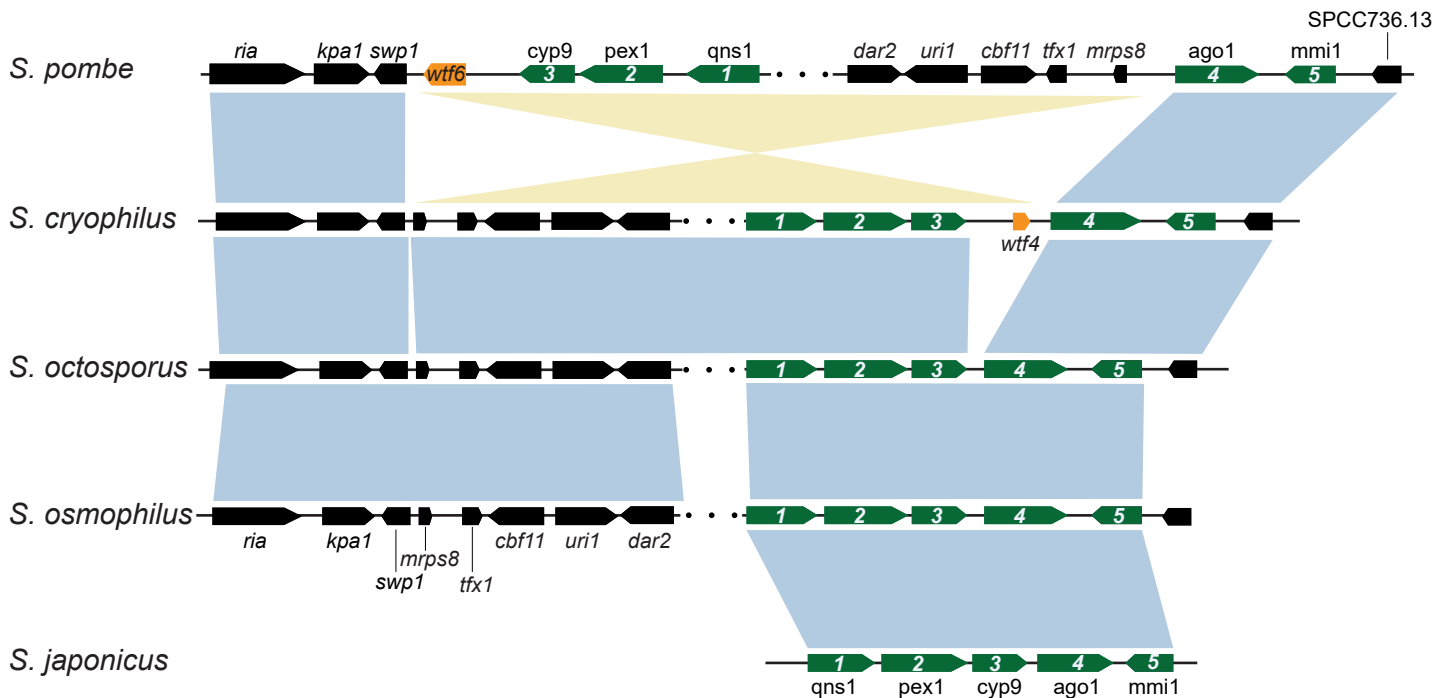

**B**

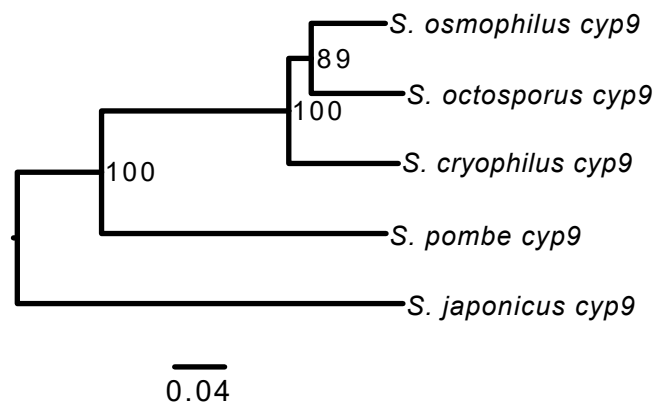

**C**

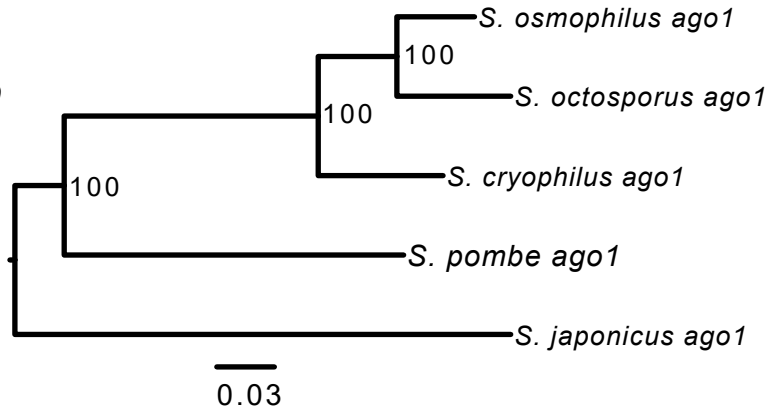



**Figure 5:** Gene duplication and non-allelic gene conversion within *wtf* gene family.

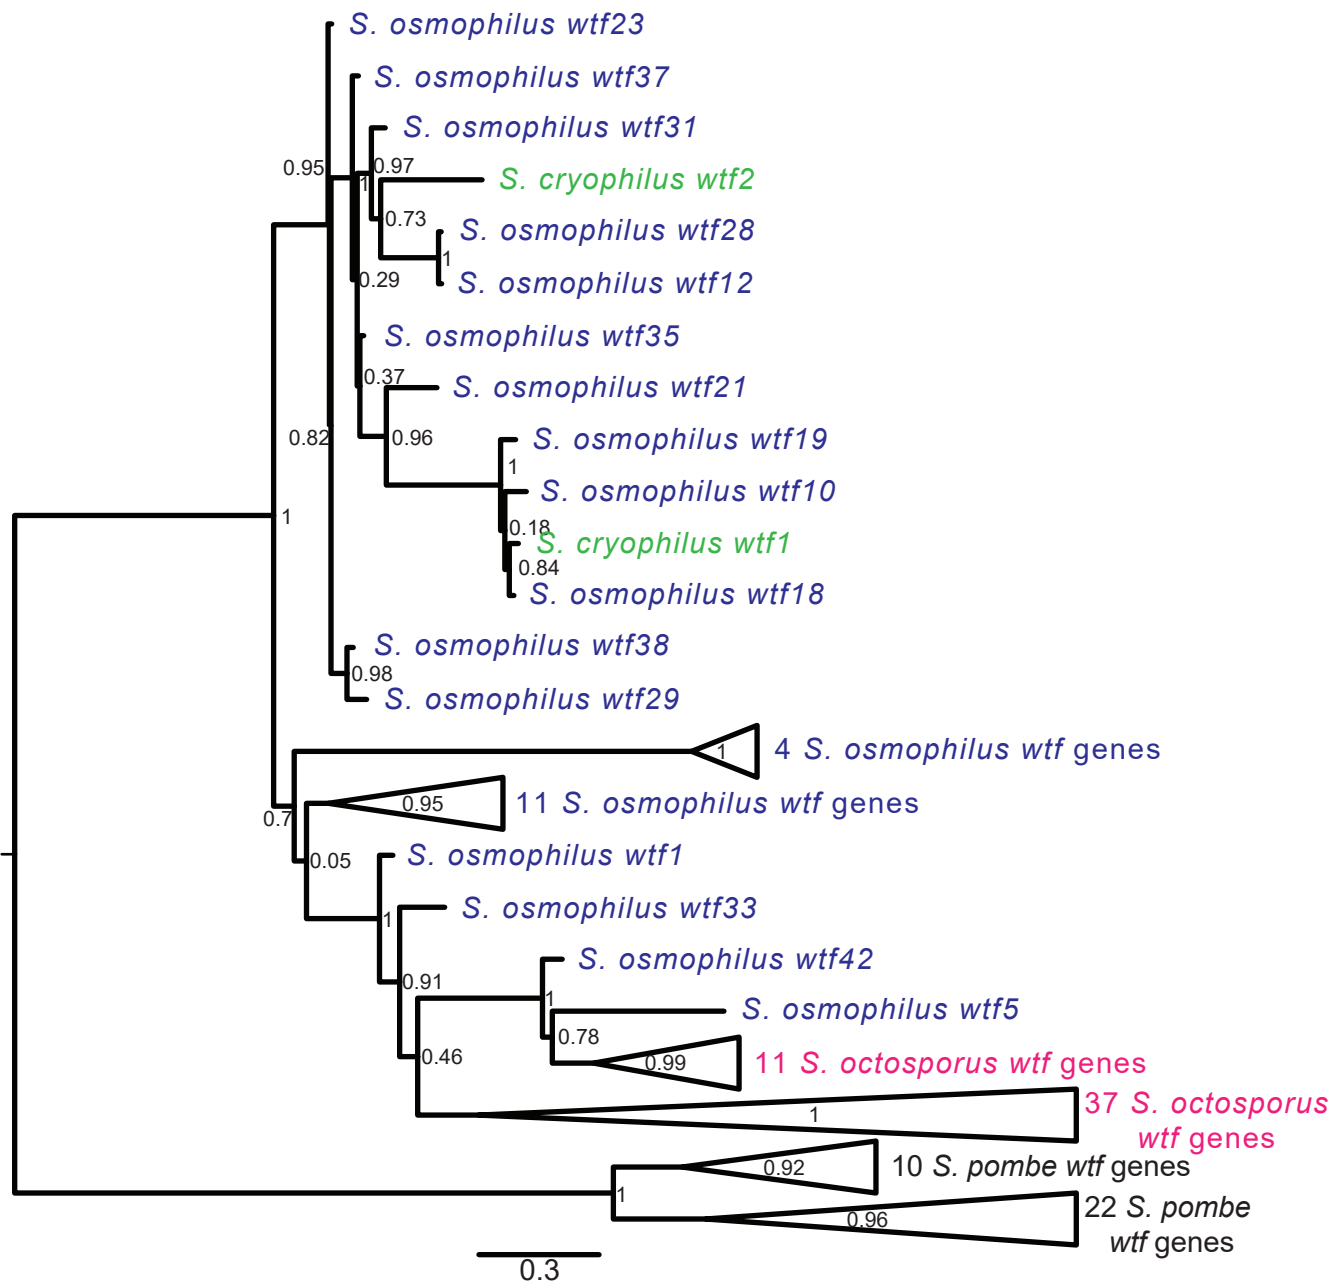



**Figure 5-figure supplement 2:** Contraction and expansion of repeat sequences in *wtf* genes

**A** *S. octosporus wtf* exon 4 repeat

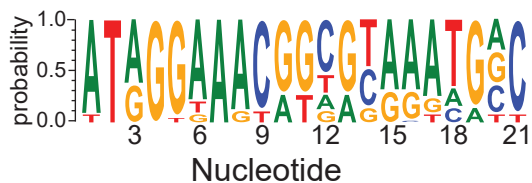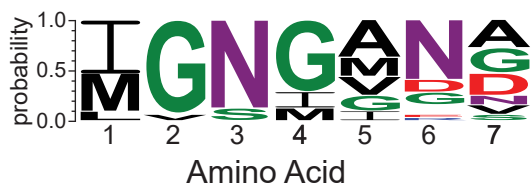

**B** *S. octosporus wtf* exon 4 repeat region

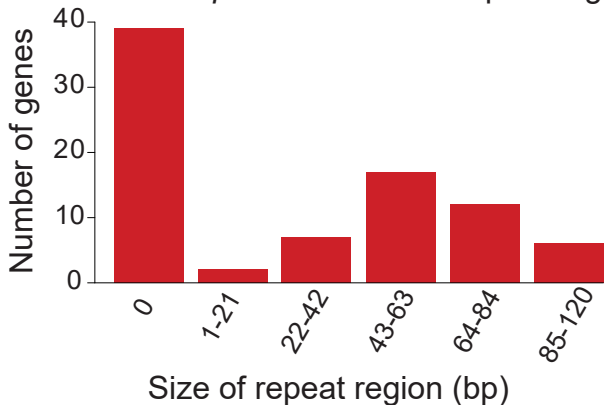

**C** *S. osmophilus wtf* exon 4 repeat

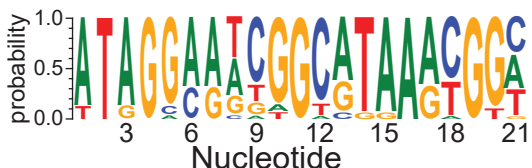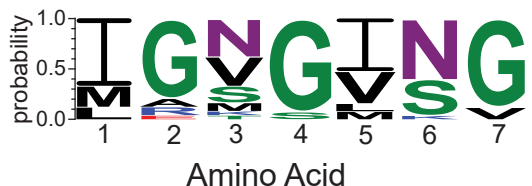

**D** *S. osmophilus wtf* exon 4 repeat region

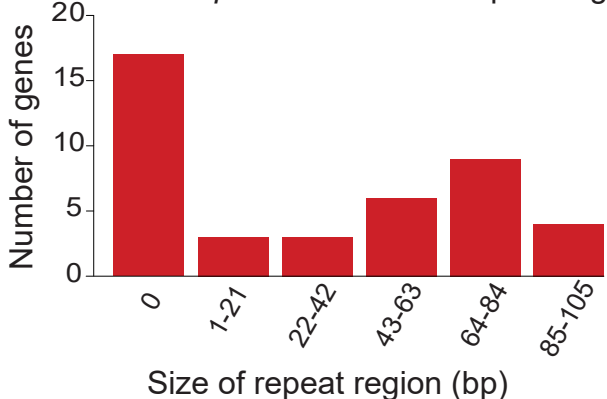

**E** *S. pombe wtf* exon 6 repeat

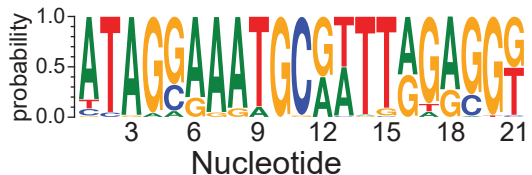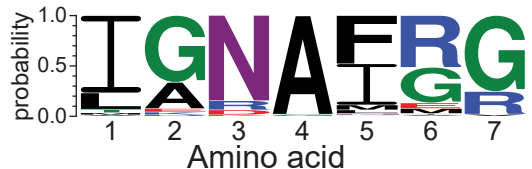

**F** *S. pombe wtf* exon 6 repeat region

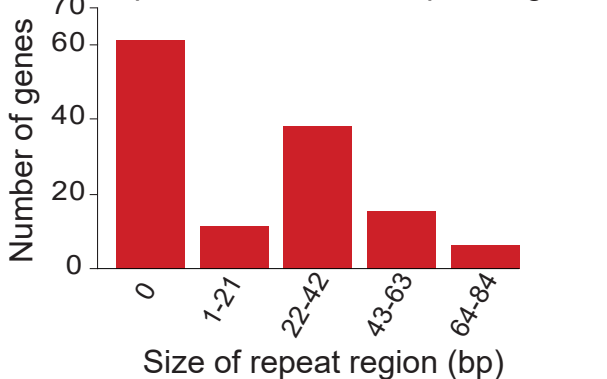

**Figure 6:** *wtf* genes duplicated into pre-existing 5S rDNA

**A**

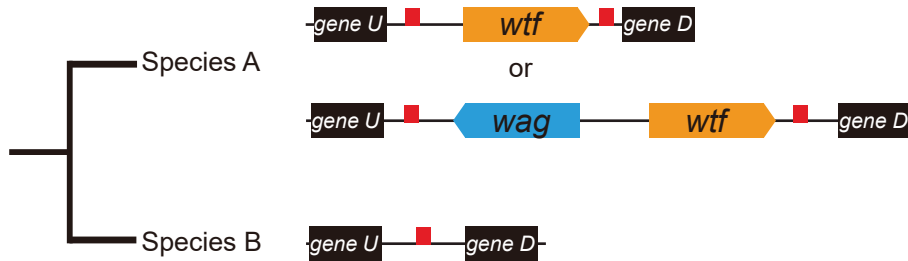

**B**

| Species A            | Species B                              | <i>wtf</i> +5S rDNA locus in species A with a lone 5S rDNA at the locus in species B* |
|----------------------|----------------------------------------|---------------------------------------------------------------------------------------|
| <i>S. osmophilus</i> | <i>S. octosporus</i>                   | 2 out 4                                                                               |
|                      | <i>S. cryophilus</i>                   | 11 out 12                                                                             |
|                      | <i>S. cryophilus and S. octosporus</i> | 1 out 1                                                                               |
| <i>S. octosporus</i> | <i>S. cryophilus</i>                   | 10 out 11                                                                             |
|                      | <i>S. osmophilus</i>                   | 7 out 9                                                                               |
|                      | <i>S. cryophilus and S. osmophilus</i> | 5 out 6                                                                               |

\*considers only *wtf* where no *wtf* is found in species B

**Figure 6-figure supplement 1: *wtf* gene duplication models**

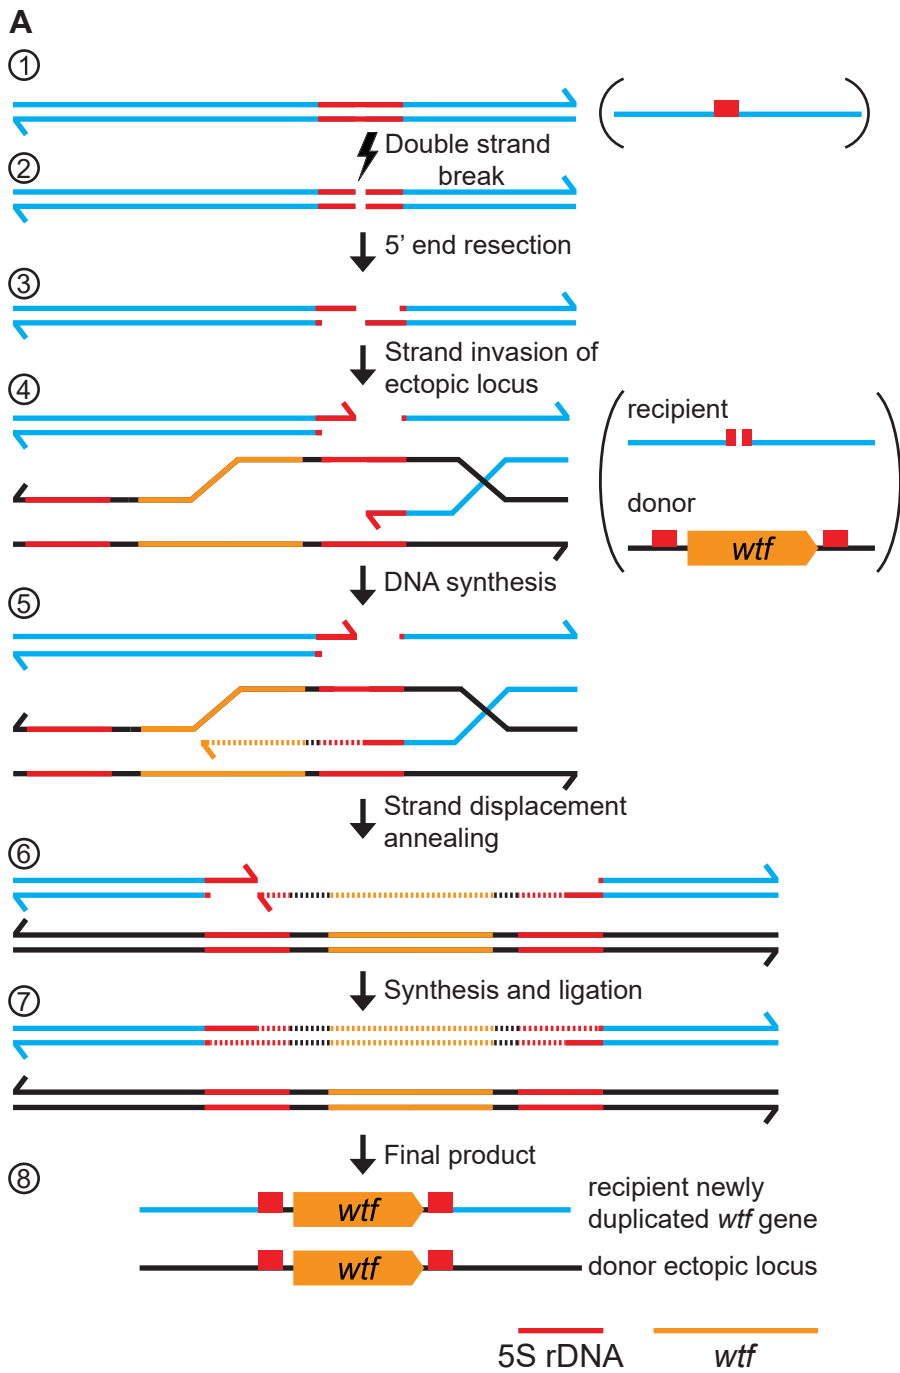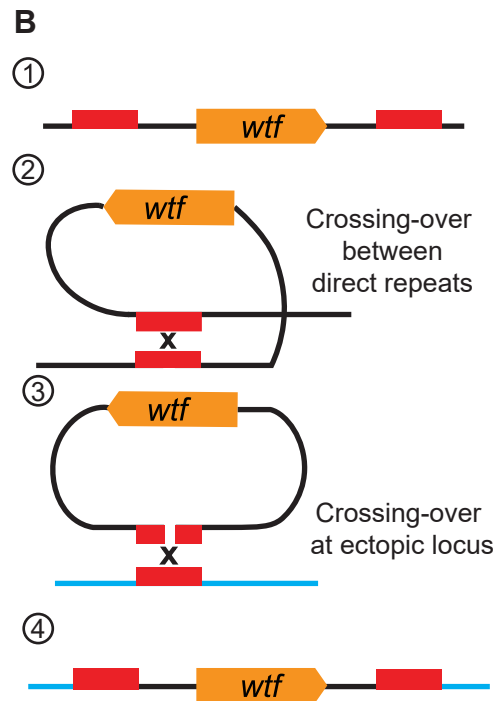

**Figure 7:** *wtf* genes can encode for poison and antidote proteins.

**A** *S. octosporus wtf25*

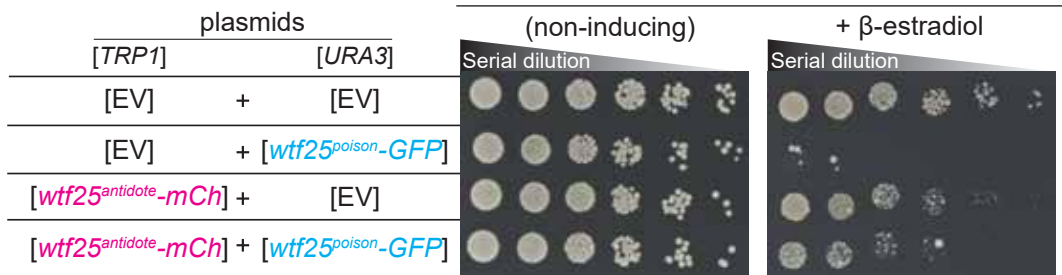

**B** *S. osmophilus wtf41*

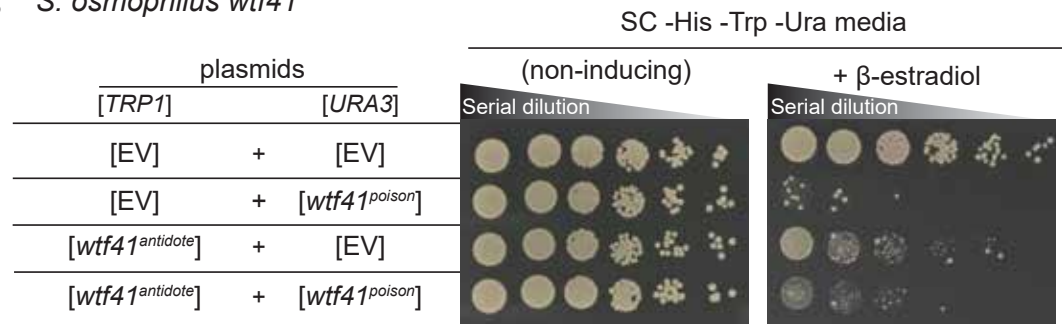

**C** *S. cryophilus wtf1*

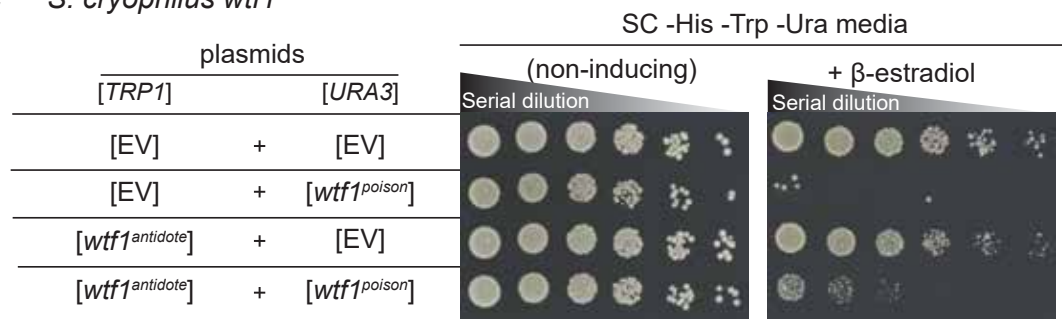

**D** [*wtf25<sup>poison</sup>-GFP*]+[EV] cell

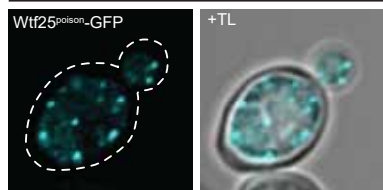

**E** [*wtf25<sup>antidote</sup>-mCh*]+[EV] cell

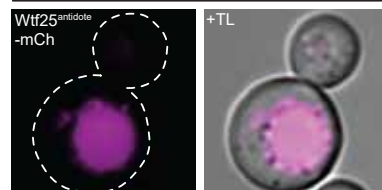

**F** [*wtf25<sup>poison</sup>-GFP*]+[*wtf25<sup>antidote</sup>-mCh*] cell

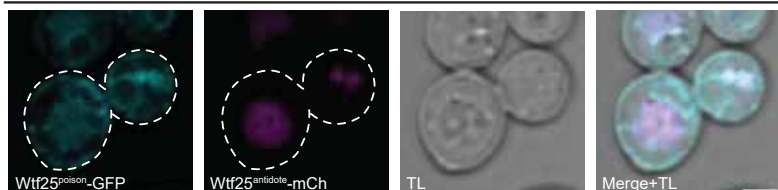

**Figure 7-figure supplement 1: Some *wtf* genes outside of *S. pombe* encode for poison and antidote proteins**

**A. *S. osmophilus wtf19***

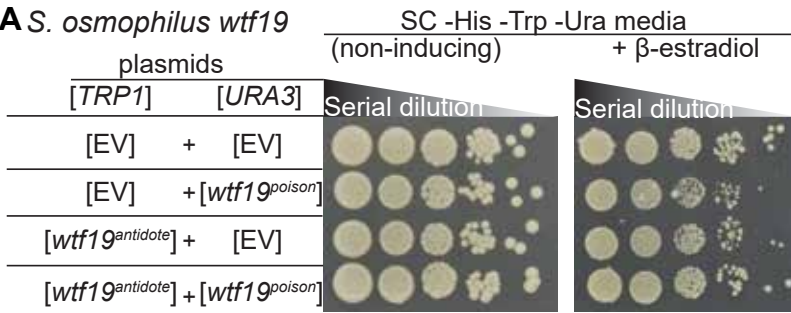

**B. *S. octosporus wtf61***

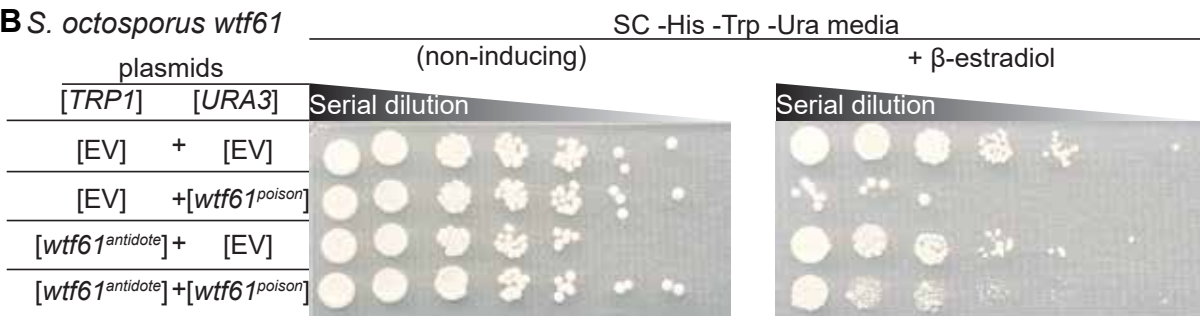

# Figure 7-figure supplement 2: Non-cognate Wtf<sup>antidotes</sup> fail to rescue cells from Wtf<sup>poisons</sup>.

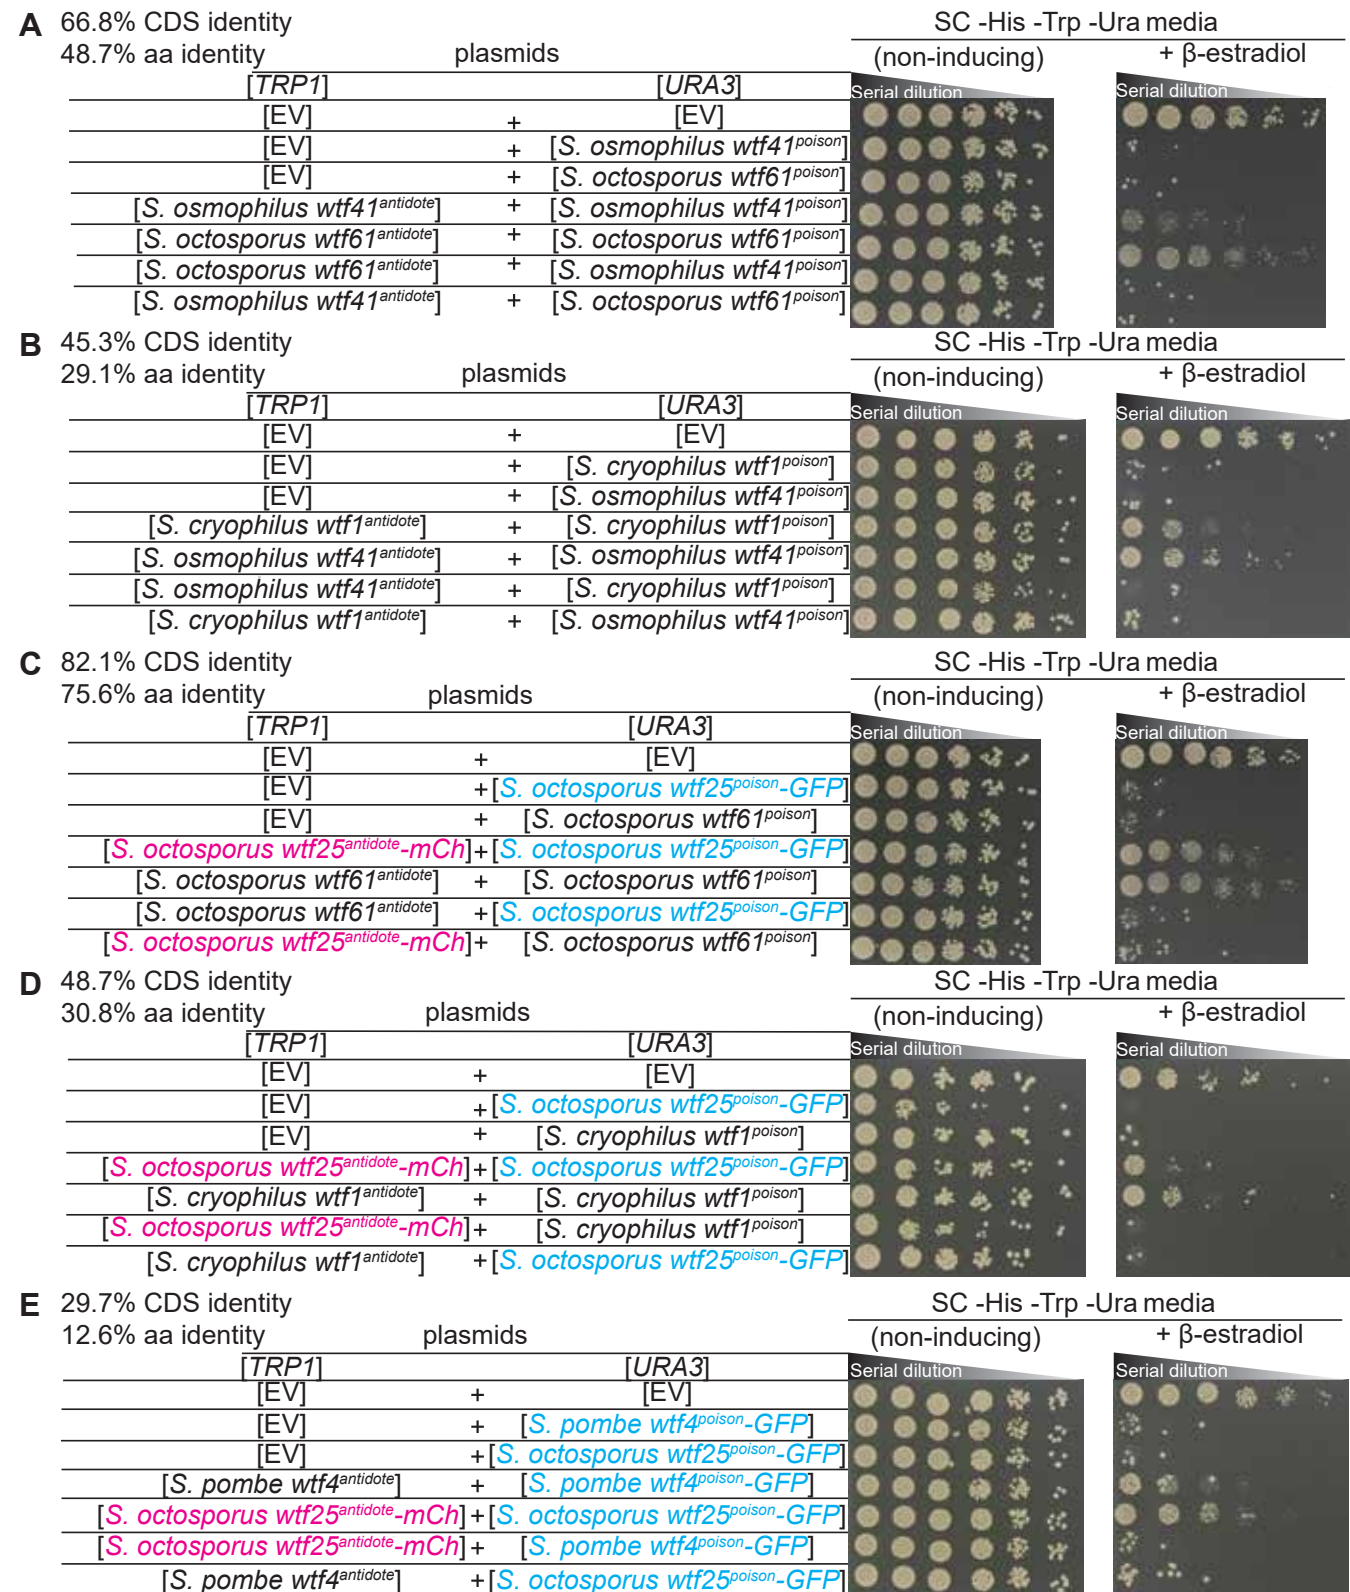



**Figure 7-figure supplement 3:** The distribution of *S. octosporus* Wtf25 proteins is similar to *S. pombe* Wtf4 proteins.

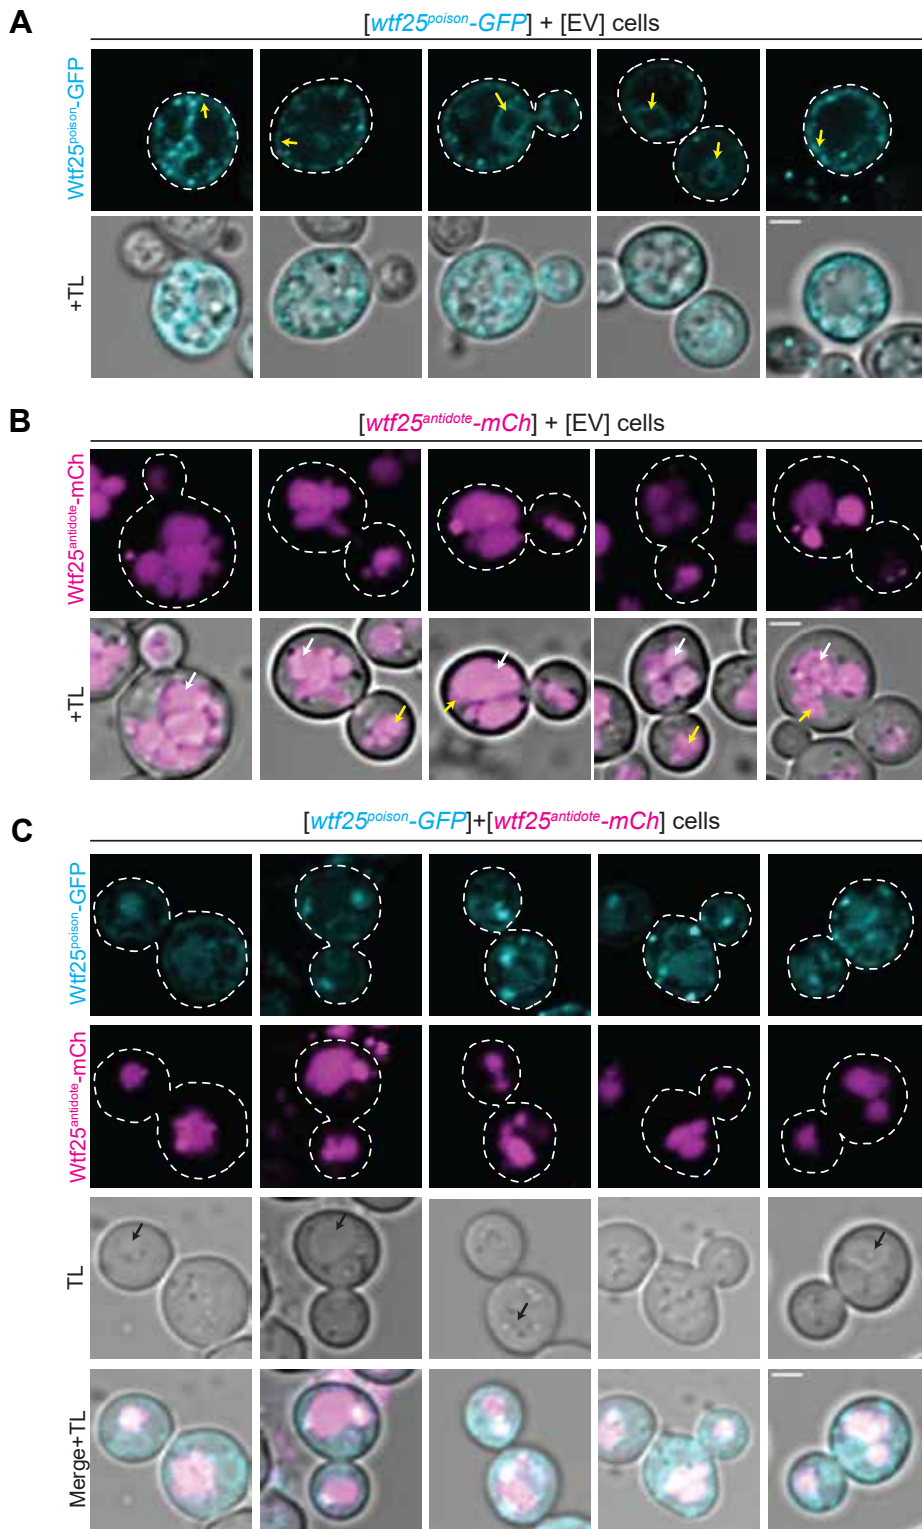

**Figure 8:** Three *S. octosporus wtf* genes, when individually deleted, caused spore viability loss in heterozygous crosses but not in homozygous crosses.

**A**

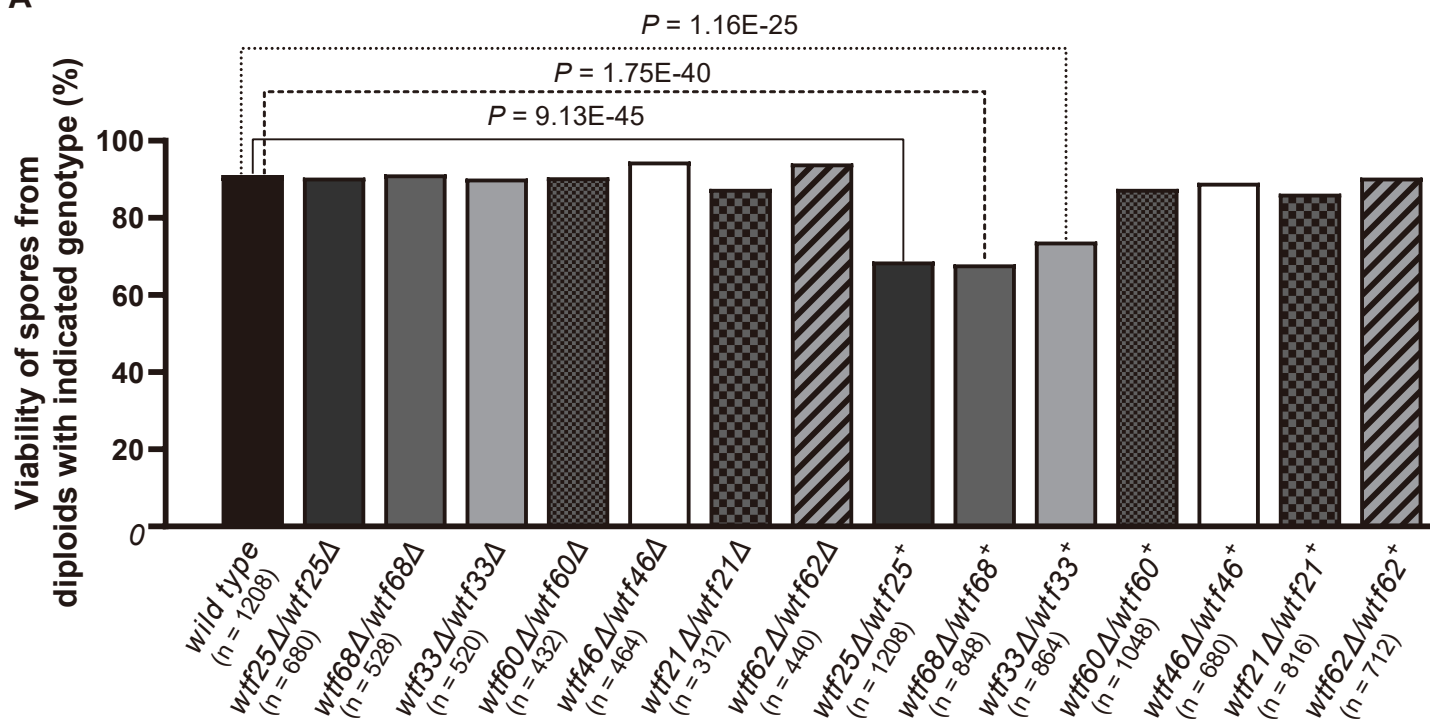

**Figure 9:** Some *S. octosporus* *wtf* genes cause meiotic drive.

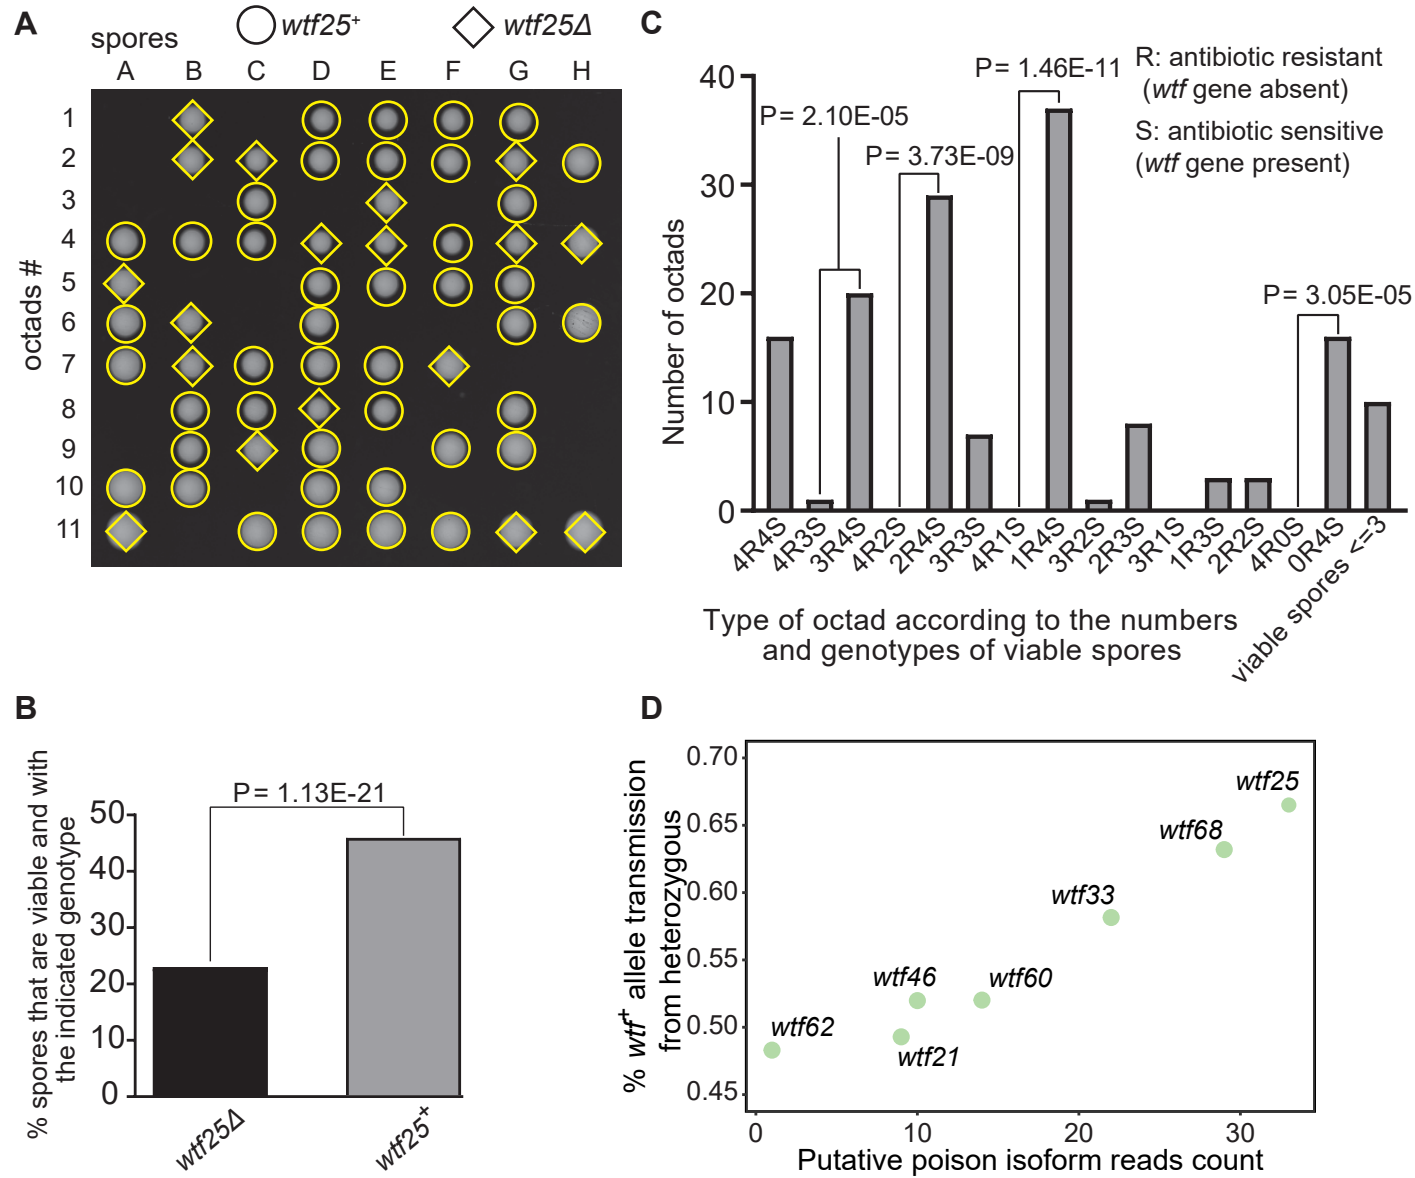

**Figure 9-figure supplement 1: Octad dissection analysis of *wtf68* heterozygous deletion cross.**

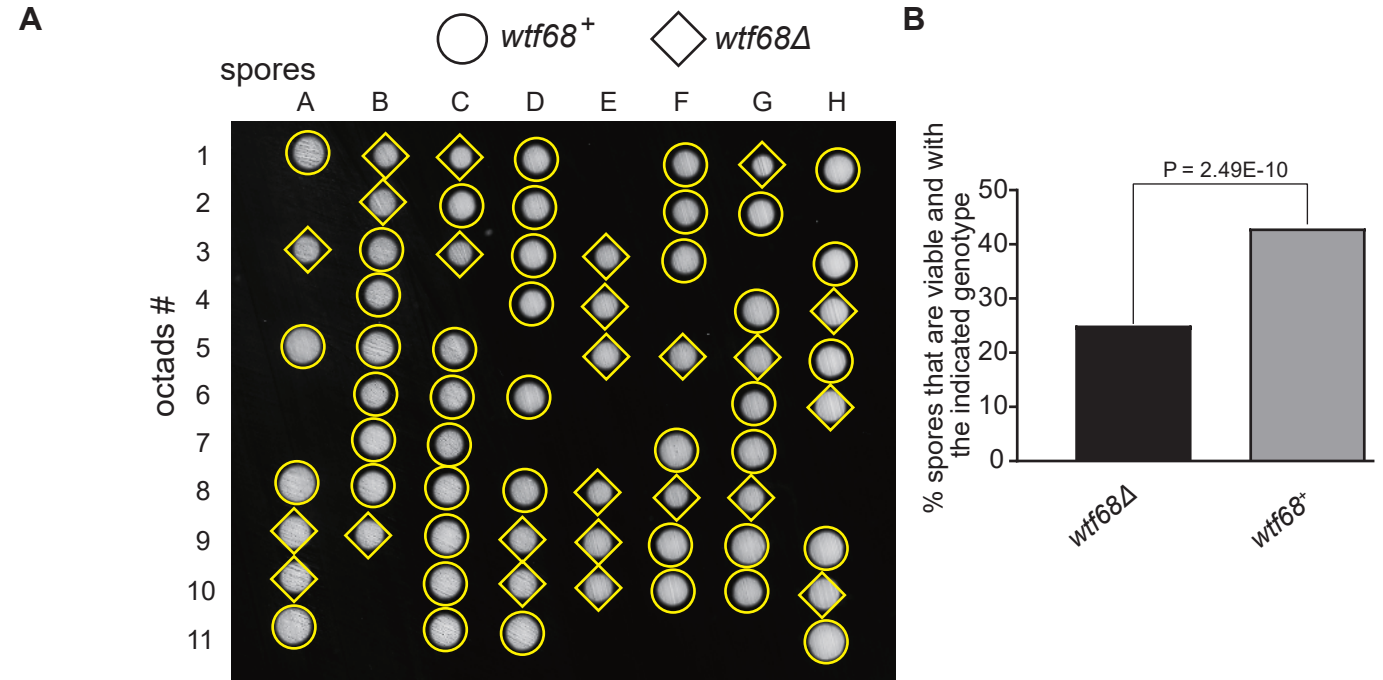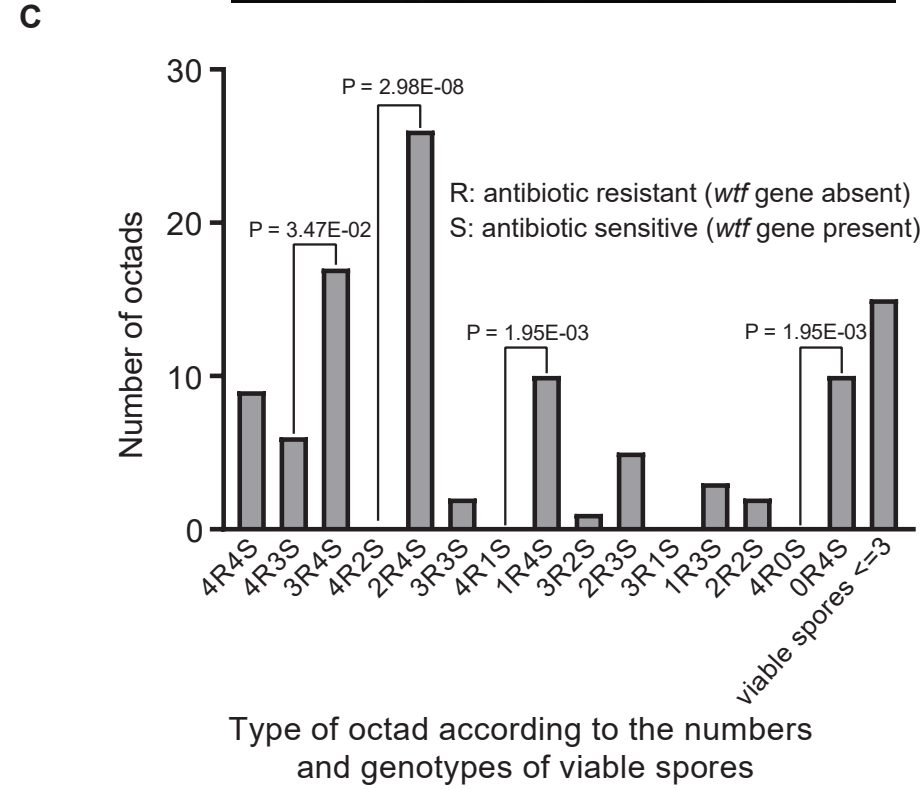

**Figure 9-figure supplement 2: Octad dissection analysis of *wtf33* heterozygous deletion cross.**

**A**

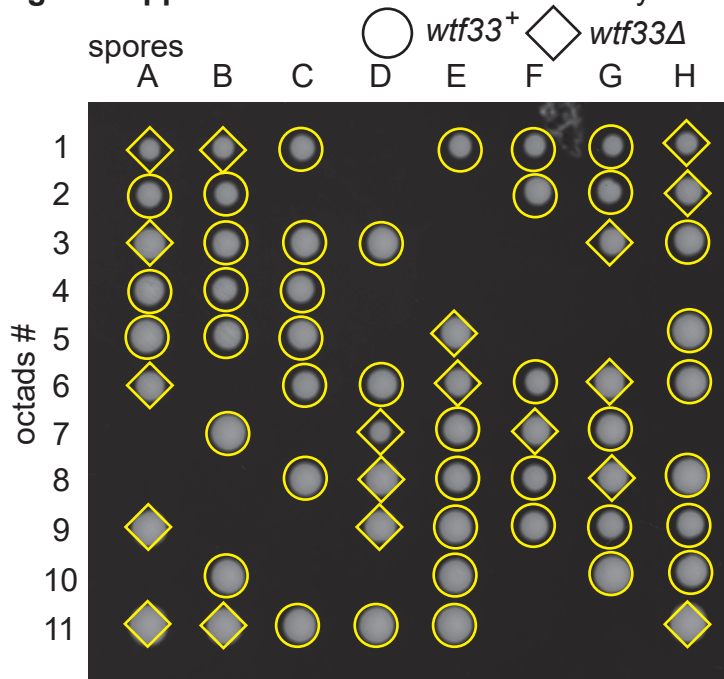

**B**

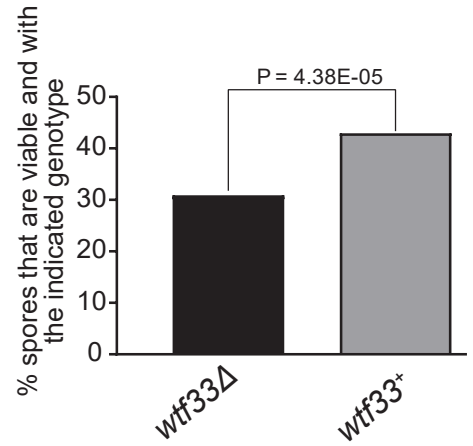

**C**

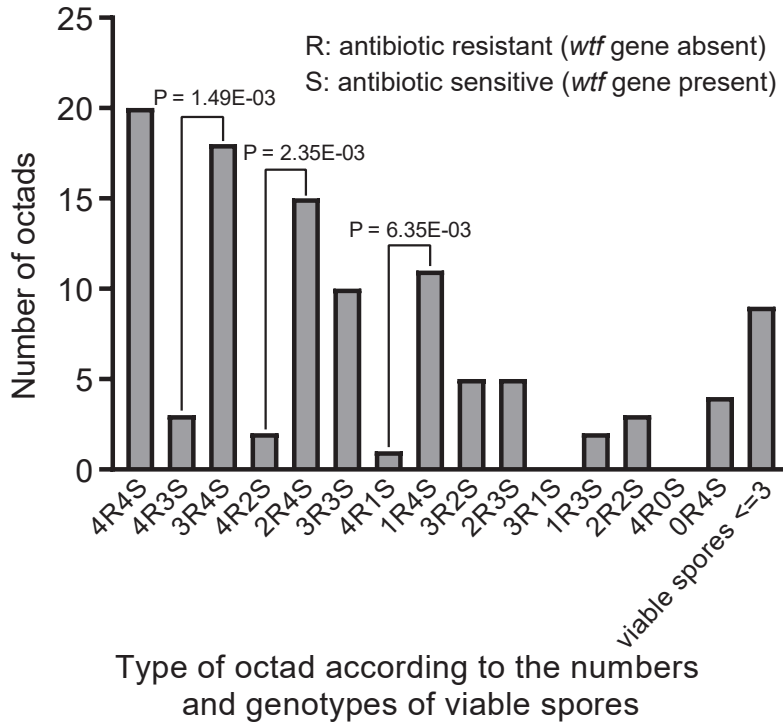

**Figure 9-figure supplement 3: Octad dissection analysis of *wtf60* heterozygous deletion cross.**

**A**

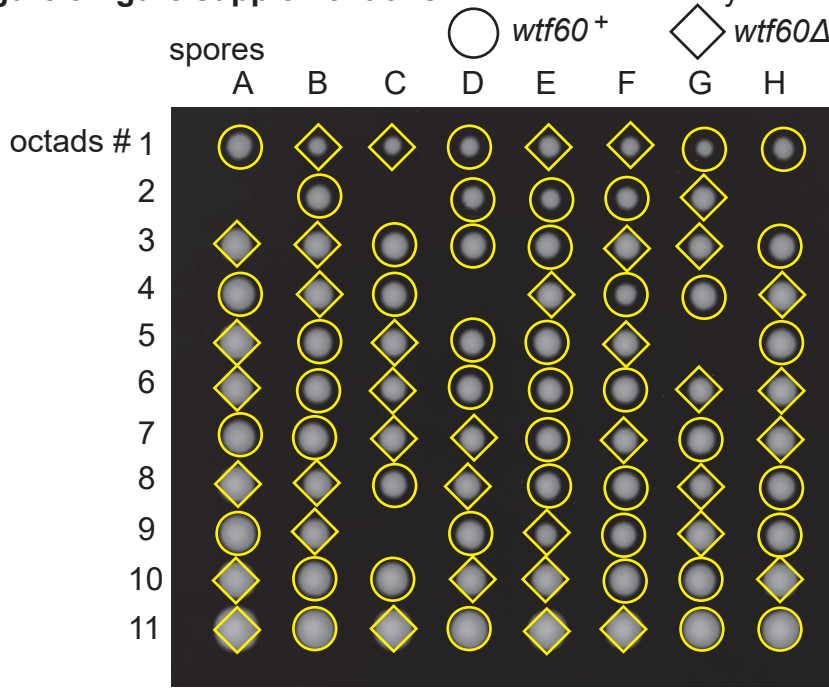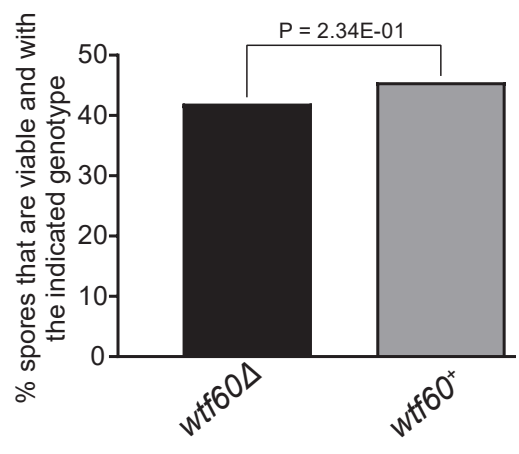

**C**

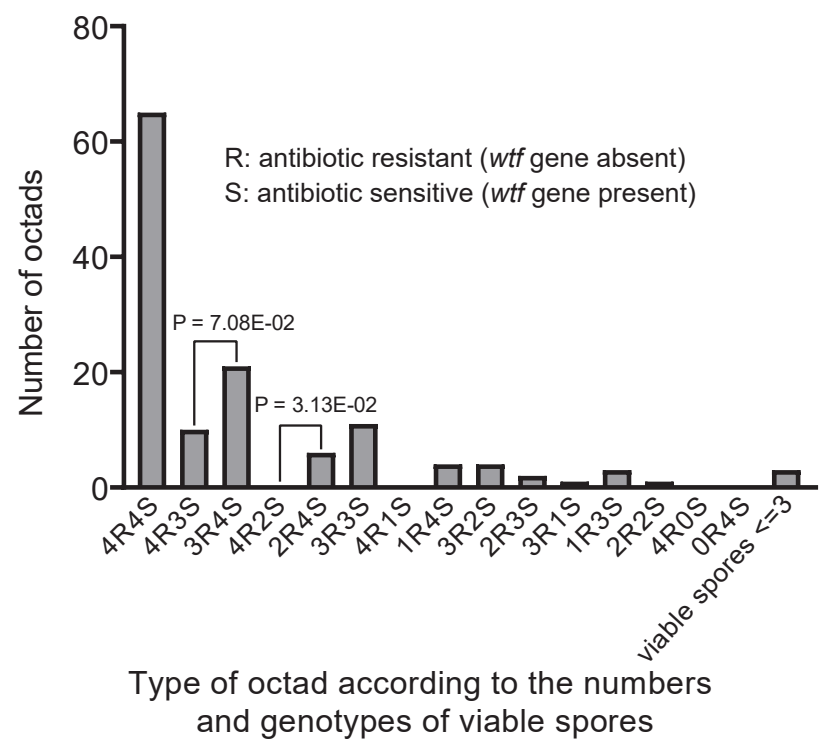

**Figure 9-figure supplement 4: Octad dissection analysis of *wtf46* heterozygous deletion cross.**

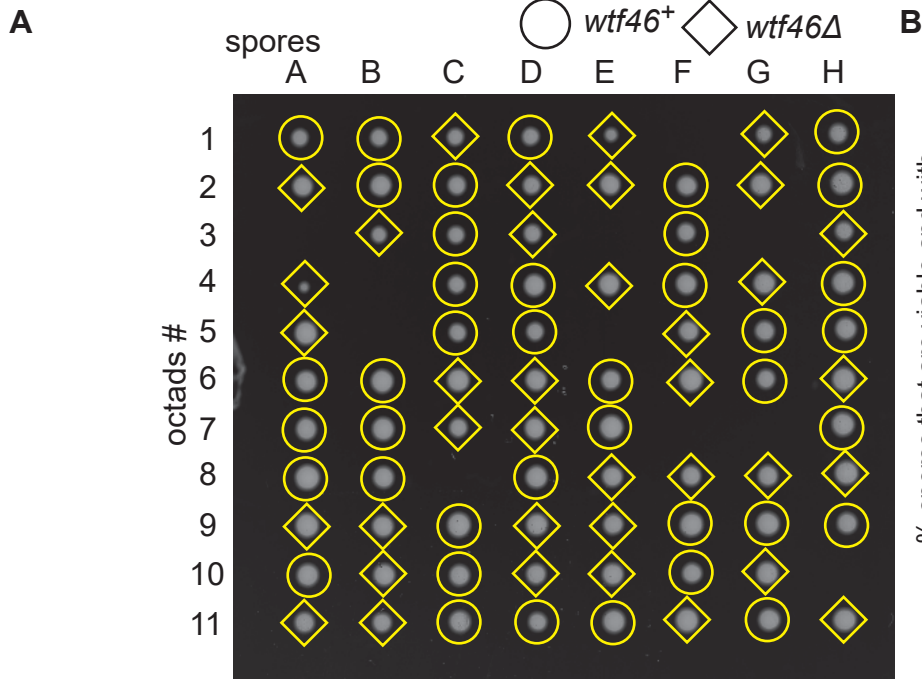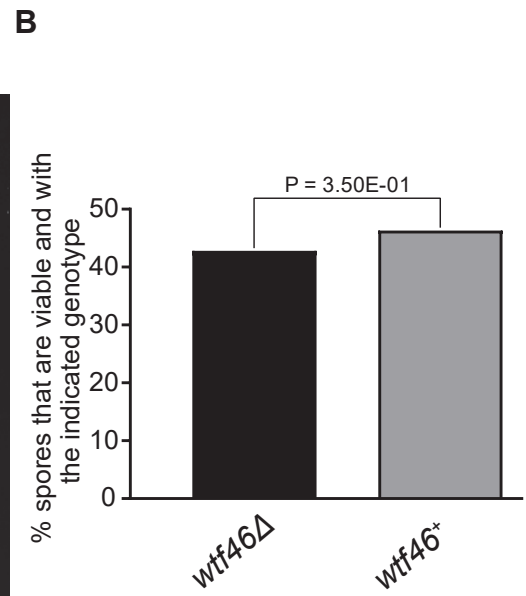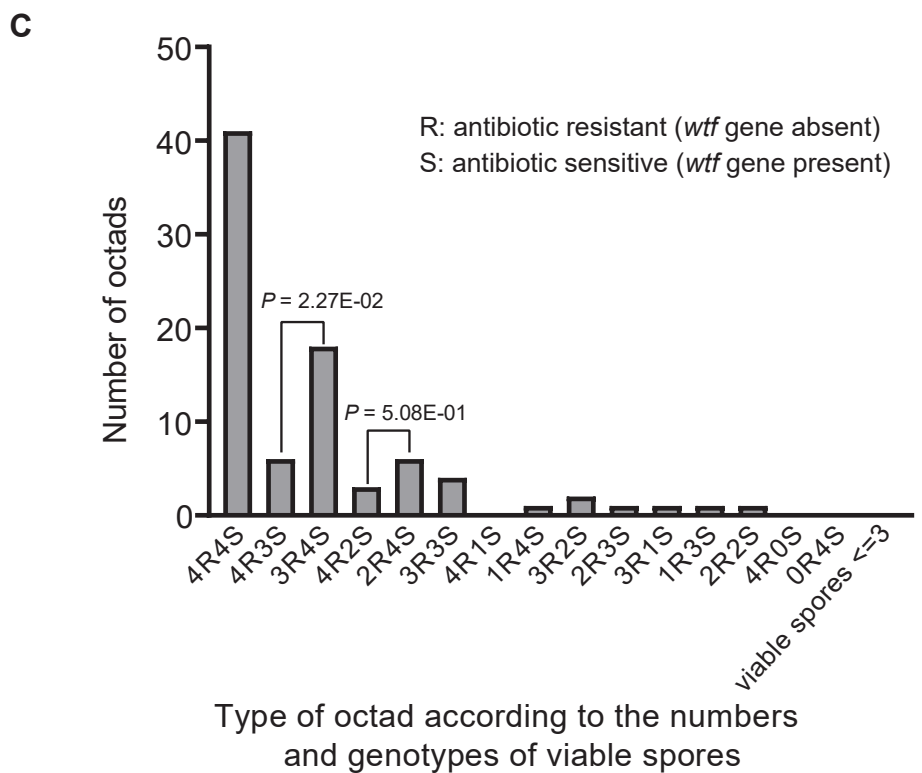

**Figure 9-figure supplement 5: Octad dissection analysis of *wtf21* heterozygous deletion cross.**

**A**

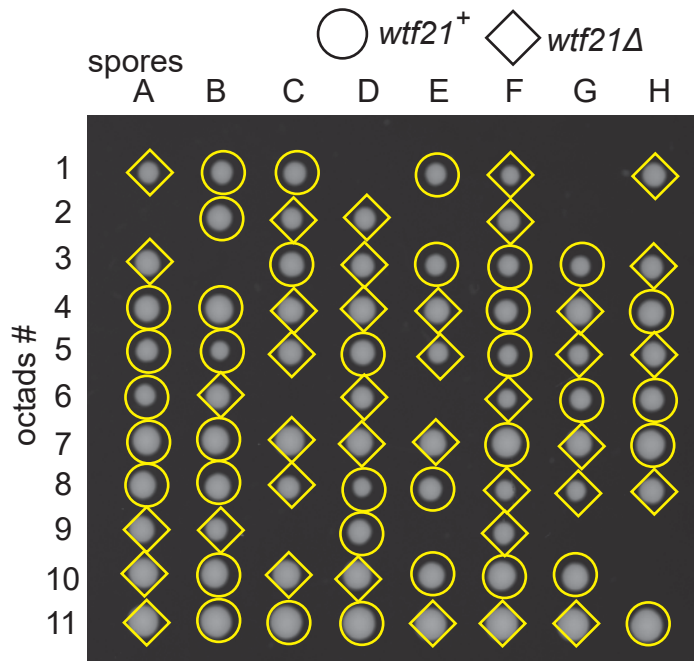

**B**

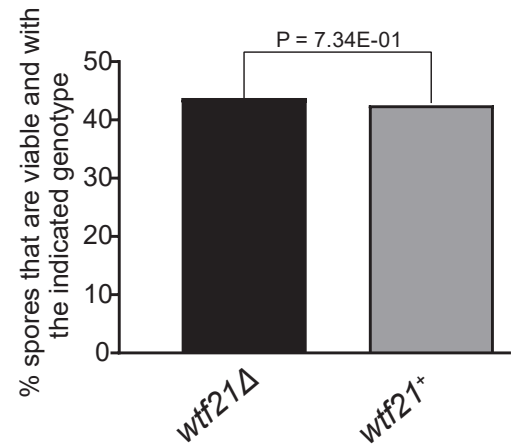

**C**

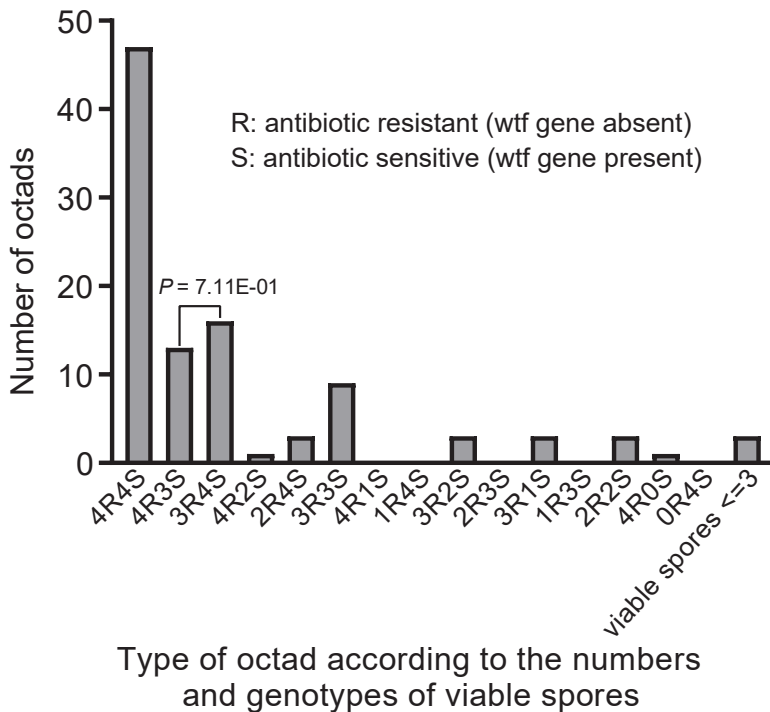



**Figure 9-figure supplement 6: Octad dissection analysis of *wtf62* heterozygous deletion cross.**

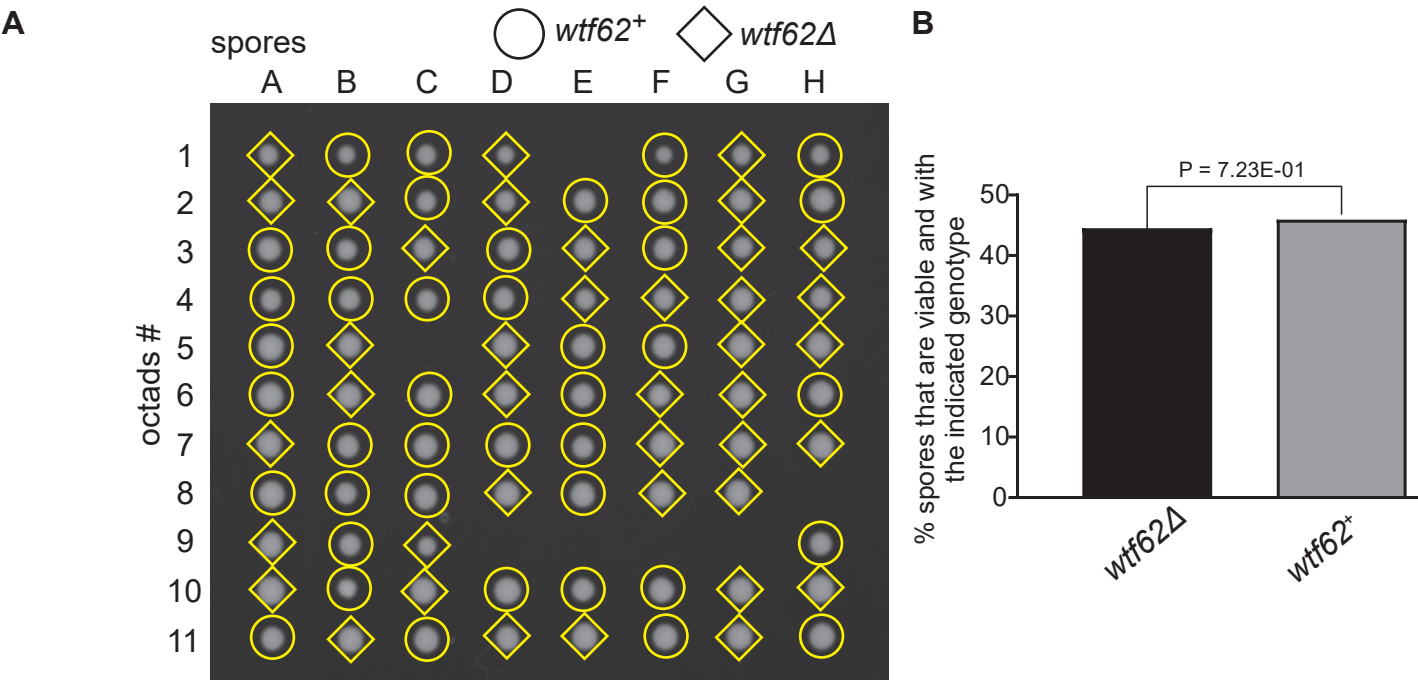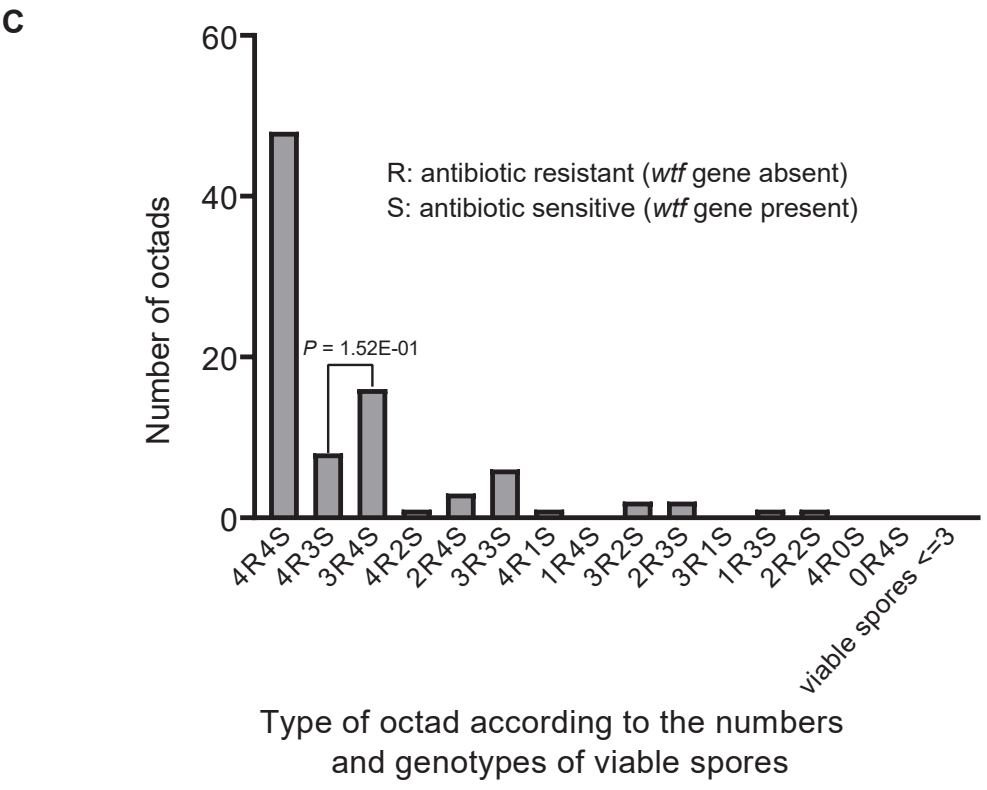

**Figure 10:** *S. octosporus* *wtf25* is a poison-and-antidote killer meiotic driver

**A**

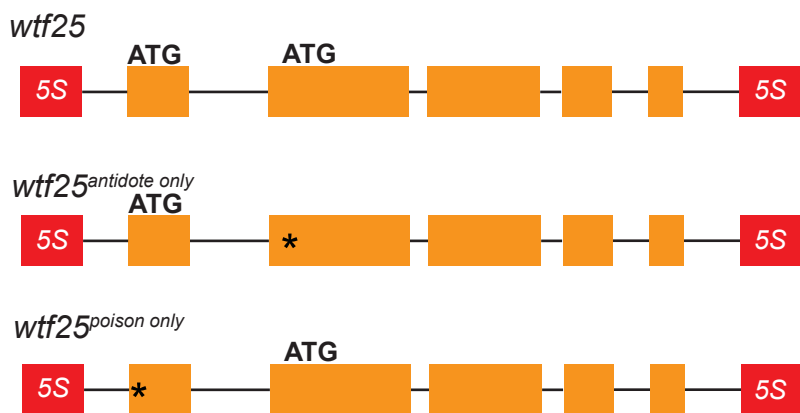

**B**

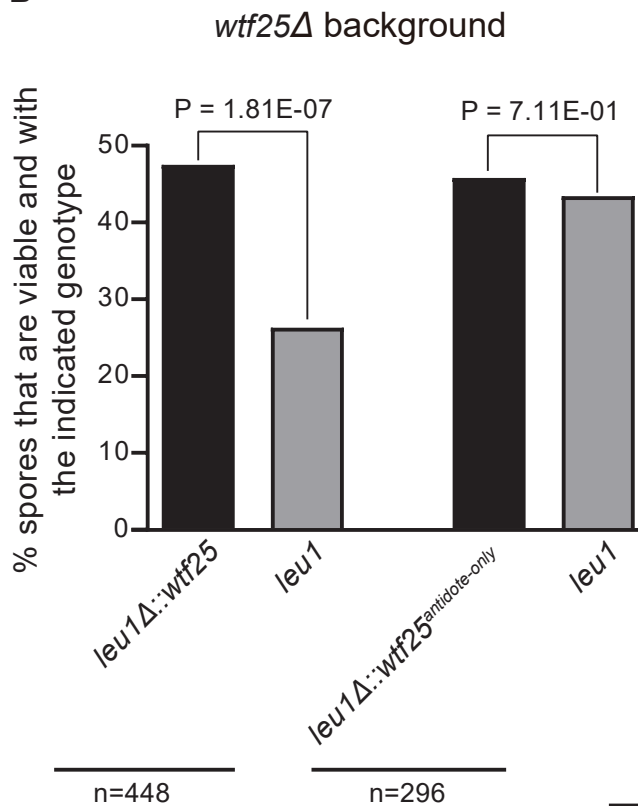

**C**

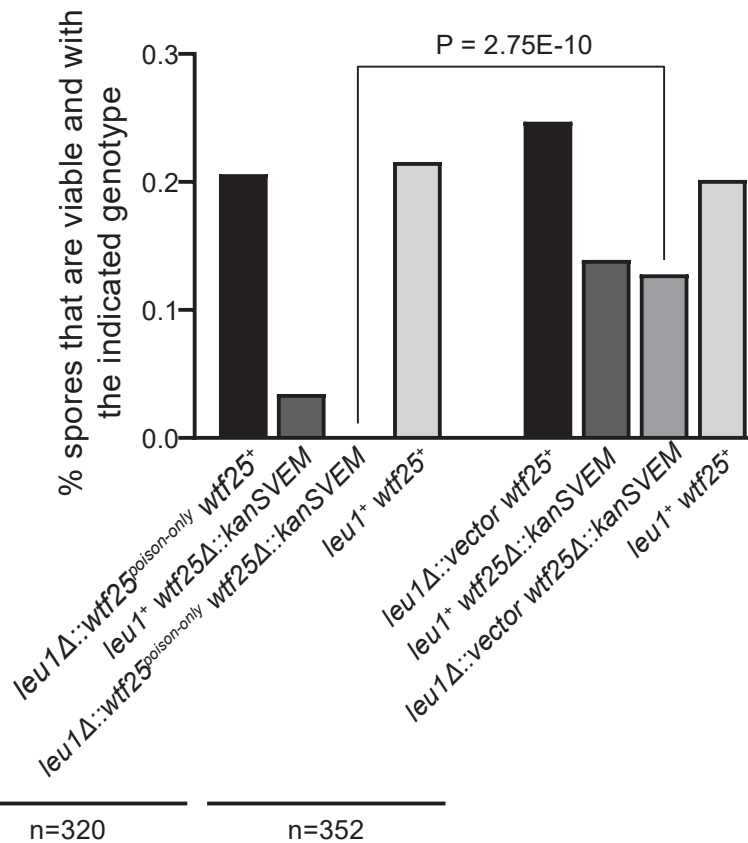

**Figure 11:** Model for long-term persistence of *wtf* meiotic drivers

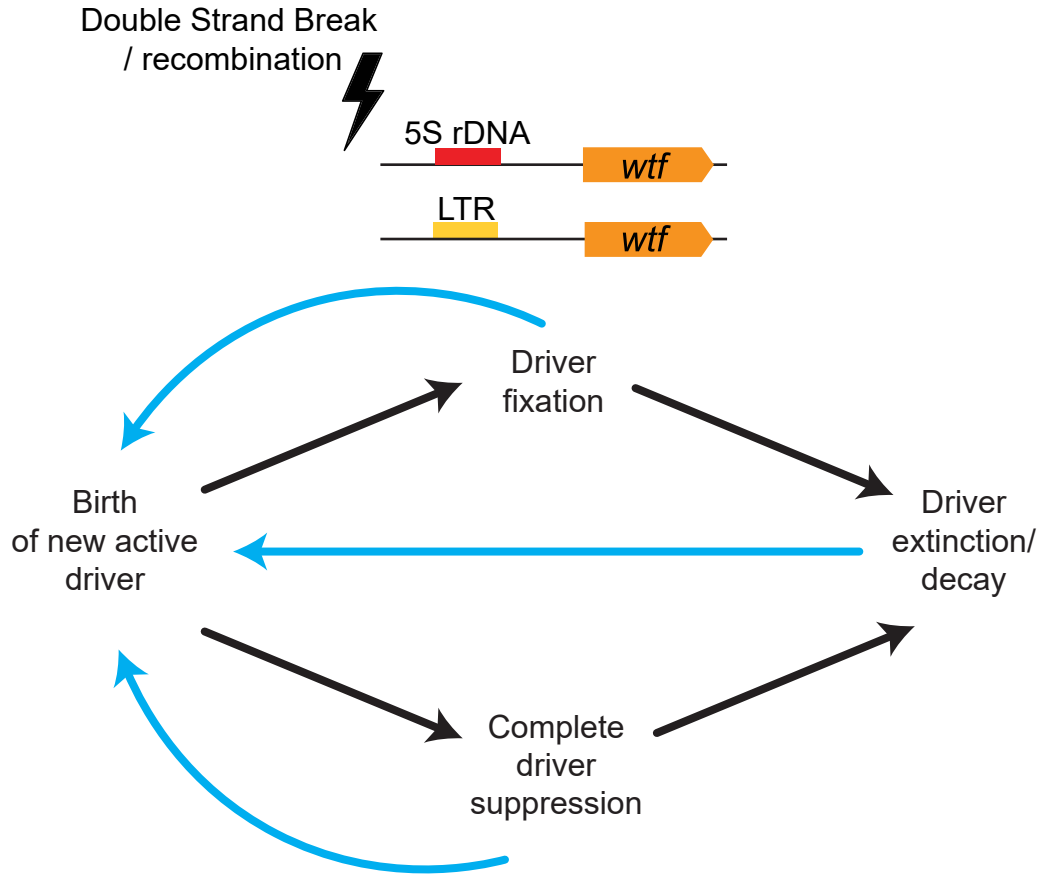

Source: https://www.biorxiv.org/content/10.1101/2022.06.24.497463v1.full.pdf
